# Supplementary material for: Fragmentation of Small-Cell Lung Cancer Regulatory States in Heterotypic Microenvironments
Source: Oxford University Press journal article supplement (doi:10.1158/0008-5472.can-20-1036), 2021-02-02
Supplement: 00085472can201036-sup-240356_2_supp_6873417_qnkm55.xlsx [file 00085472can201036-sup-240356_2_supp_6873417_qnkm55.xlsx]

## Sheet: KP1-GFP cells 
Gene Set Name	# Genes in Gene Set (K)	Description	# Genes in Overlap (k)	k/K	p-value	FDR q-value
HALLMARK_MYC_TARGETS_V1	200	A subgroup of genes regulated by MYC - version 1 (v1).	21	0.105	1.69e-15	8.43e-14
HALLMARK_E2F_TARGETS	200	Genes encoding cell cycle related targets of E2F transcription factors.	19	0.095	2.35e-13	5.87e-12
HALLMARK_OXIDATIVE_PHOSPHORYLATION	200	Genes encoding proteins involved in oxidative phosphorylation.	16	0.08	2.46e-10	4.1e-09
HALLMARK_ADIPOGENESIS	200	Genes up-regulated during adipocyte differentiation (adipogenesis).	15	0.075	2.19e-09	2.19e-08
HALLMARK_G2M_CHECKPOINT	200	Genes involved in the G2/M checkpoint, as in progression through the cell division cycle.	15	0.075	2.19e-09	2.19e-08
HALLMARK_MITOTIC_SPINDLE	199	Genes important for mitotic spindle assembly.	11	0.0553	6.16e-06	4.62e-05
HALLMARK_MTORC1_SIGNALING	200	Genes up-regulated through activation of mTORC1 complex.	11	0.055	6.46e-06	4.62e-05
HALLMARK_UNFOLDED_PROTEIN_RESPONSE	113	Genes up-regulated during unfolded protein response, a cellular stress response related to the endoplasmic reticulum.	8	0.0708	1.96e-05	0.000122
HALLMARK_HEME_METABOLISM	200	Genes involved in metabolism of heme (a cofactor consisting of iron and porphyrin) and erythroblast differentiation.	8	0.04	0.000995	0.00497
HALLMARK_P53_PATHWAY	200	Genes involved in p53 pathways and networks.	8	0.04	0.000995	0.00497
HALLMARK_FATTY_ACID_METABOLISM	158	Genes encoding proteins involved in metabolism of fatty acids.	7	0.0443	0.00113	0.00516
Gene/Gene Set Overlap Matrix
Entrez Gene Id	Gene Symbol	Gene Description	HALLMARK_MYC_TARGETS_V1	HALLMARK_E2F_TARGETS	HALLMARK_OXIDATIVE_PHOSPHORYLATION	HALLMARK_ADIPOGENESIS	HALLMARK_G2M_CHECKPOINT	HALLMARK_MITOTIC_SPINDLE	HALLMARK_MTORC1_SIGNALING	HALLMARK_UNFOLDED_PROTEIN_RESPONSE	HALLMARK_HEME_METABOLISM	HALLMARK_P53_PATHWAY	HALLMARK_FATTY_ACID_METABOLISM
4171	MCM2	minichromosome maintenance complex component 2 [Source:HGNC Symbol;Acc:HGNC:6944]	HALLMARK_MYC_TARGETS_V1	HALLMARK_E2F_TARGETS			HALLMARK_G2M_CHECKPOINT		HALLMARK_MTORC1_SIGNALING
3838	KPNA2	karyopherin subunit alpha 2 [Source:HGNC Symbol;Acc:HGNC:6395]	HALLMARK_MYC_TARGETS_V1	HALLMARK_E2F_TARGETS			HALLMARK_G2M_CHECKPOINT
1503	CTPS1	CTP synthase 1 [Source:HGNC Symbol;Acc:HGNC:2519]	HALLMARK_MYC_TARGETS_V1	HALLMARK_E2F_TARGETS
7913	DEK	DEK proto-oncogene [Source:HGNC Symbol;Acc:HGNC:2768]	HALLMARK_MYC_TARGETS_V1	HALLMARK_E2F_TARGETS
5230	PGK1	phosphoglycerate kinase 1 [Source:HGNC Symbol;Acc:HGNC:8896]	HALLMARK_MYC_TARGETS_V1						HALLMARK_MTORC1_SIGNALING
11260	XPOT	exportin for tRNA [Source:HGNC Symbol;Acc:HGNC:12826]	HALLMARK_MYC_TARGETS_V1							HALLMARK_UNFOLDED_PROTEIN_RESPONSE
3615	IMPDH2	inosine monophosphate dehydrogenase 2 [Source:HGNC Symbol;Acc:HGNC:6053]	HALLMARK_MYC_TARGETS_V1
1176	AP3S1	adaptor related protein complex 3 subunit sigma 1 [Source:HGNC Symbol;Acc:HGNC:2013]	HALLMARK_MYC_TARGETS_V1
7555	CNBP	CCHC-type zinc finger nucleic acid binding protein [Source:HGNC Symbol;Acc:HGNC:13164]	HALLMARK_MYC_TARGETS_V1
8664	EIF3D	eukaryotic translation initiation factor 3 subunit D [Source:HGNC Symbol;Acc:HGNC:3278]	HALLMARK_MYC_TARGETS_V1
26354	GNL3	G protein nucleolar 3 [Source:HGNC Symbol;Acc:HGNC:29931]	HALLMARK_MYC_TARGETS_V1
3066	HDAC2	histone deacetylase 2 [Source:HGNC Symbol;Acc:HGNC:4853]	HALLMARK_MYC_TARGETS_V1
10155	TRIM28	tripartite motif containing 28 [Source:HGNC Symbol;Acc:HGNC:16384]	HALLMARK_MYC_TARGETS_V1
10291	SF3A1	splicing factor 3a subunit 1 [Source:HGNC Symbol;Acc:HGNC:10765]	HALLMARK_MYC_TARGETS_V1
10576	CCT2	chaperonin containing TCP1 subunit 2 [Source:HGNC Symbol;Acc:HGNC:1615]	HALLMARK_MYC_TARGETS_V1
23450	SF3B3	splicing factor 3b subunit 3 [Source:HGNC Symbol;Acc:HGNC:10770]	HALLMARK_MYC_TARGETS_V1
3326	HSP90AB1	heat shock protein 90 alpha family class B member 1 [Source:HGNC Symbol;Acc:HGNC:5258]	HALLMARK_MYC_TARGETS_V1
51020	HDDC2	HD domain containing 2 [Source:HGNC Symbol;Acc:HGNC:21078]	HALLMARK_MYC_TARGETS_V1
6240	RRM1	ribonucleotide reductase catalytic subunit M1 [Source:HGNC Symbol;Acc:HGNC:10451]	HALLMARK_MYC_TARGETS_V1
6428	SRSF3	serine and arginine rich splicing factor 3 [Source:HGNC Symbol;Acc:HGNC:10785]	HALLMARK_MYC_TARGETS_V1
7284	TUFM	Tu translation elongation factor, mitochondrial [Source:HGNC Symbol;Acc:HGNC:12420]	HALLMARK_MYC_TARGETS_V1
983	CDK1	cyclin dependent kinase 1 [Source:HGNC Symbol;Acc:HGNC:1722]		HALLMARK_E2F_TARGETS			HALLMARK_G2M_CHECKPOINT	HALLMARK_MITOTIC_SPINDLE
11004	KIF2C	kinesin family member 2C [Source:HGNC Symbol;Acc:HGNC:6393]		HALLMARK_E2F_TARGETS			HALLMARK_G2M_CHECKPOINT	HALLMARK_MITOTIC_SPINDLE
3835	KIF22	kinesin family member 22 [Source:HGNC Symbol;Acc:HGNC:6391]		HALLMARK_E2F_TARGETS			HALLMARK_G2M_CHECKPOINT	HALLMARK_MITOTIC_SPINDLE
3925	STMN1	stathmin 1 [Source:HGNC Symbol;Acc:HGNC:6510]		HALLMARK_E2F_TARGETS			HALLMARK_G2M_CHECKPOINT
4678	NASP	nuclear autoantigenic sperm protein [Source:HGNC Symbol;Acc:HGNC:7644]		HALLMARK_E2F_TARGETS			HALLMARK_G2M_CHECKPOINT
1164	CKS2	CDC28 protein kinase regulatory subunit 2 [Source:HGNC Symbol;Acc:HGNC:2000]		HALLMARK_E2F_TARGETS			HALLMARK_G2M_CHECKPOINT
4288	MKI67	marker of proliferation Ki-67 [Source:HGNC Symbol;Acc:HGNC:7107]		HALLMARK_E2F_TARGETS			HALLMARK_G2M_CHECKPOINT
9126	SMC3	structural maintenance of chromosomes 3 [Source:HGNC Symbol;Acc:HGNC:2468]		HALLMARK_E2F_TARGETS				HALLMARK_MITOTIC_SPINDLE
5631	PRPS1	phosphoribosyl pyrophosphate synthetase 1 [Source:HGNC Symbol;Acc:HGNC:9462]		HALLMARK_E2F_TARGETS
11168	PSIP1	PC4 and SFRS1 interacting protein 1 [Source:HGNC Symbol;Acc:HGNC:9527]		HALLMARK_E2F_TARGETS
1434	CSE1L	chromosome segregation 1 like [Source:HGNC Symbol;Acc:HGNC:2431]		HALLMARK_E2F_TARGETS
1786	DNMT1	DNA methyltransferase 1 [Source:HGNC Symbol;Acc:HGNC:2976]		HALLMARK_E2F_TARGETS
23468	CBX5	chromobox 5 [Source:HGNC Symbol;Acc:HGNC:1555]		HALLMARK_E2F_TARGETS
701	BUB1B	BUB1 mitotic checkpoint serine/threonine kinase B [Source:HGNC Symbol;Acc:HGNC:1149]		HALLMARK_E2F_TARGETS
9837	GINS1	GINS complex subunit 1 [Source:HGNC Symbol;Acc:HGNC:28980]		HALLMARK_E2F_TARGETS
1891	ECH1	enoyl-CoA hydratase 1 [Source:HGNC Symbol;Acc:HGNC:3149]			HALLMARK_OXIDATIVE_PHOSPHORYLATION	HALLMARK_ADIPOGENESIS							HALLMARK_FATTY_ACID_METABOLISM
3421	IDH3G	isocitrate dehydrogenase 3 (NAD(+)) gamma [Source:HGNC Symbol;Acc:HGNC:5386]			HALLMARK_OXIDATIVE_PHOSPHORYLATION	HALLMARK_ADIPOGENESIS							HALLMARK_FATTY_ACID_METABOLISM
5264	PHYH	phytanoyl-CoA 2-hydroxylase [Source:HGNC Symbol;Acc:HGNC:8940]			HALLMARK_OXIDATIVE_PHOSPHORYLATION	HALLMARK_ADIPOGENESIS
10975	UQCR11	ubiquinol-cytochrome c reductase, complex III subunit XI [Source:HGNC Symbol;Acc:HGNC:30862]			HALLMARK_OXIDATIVE_PHOSPHORYLATION	HALLMARK_ADIPOGENESIS
1431	CS	citrate synthase [Source:HGNC Symbol;Acc:HGNC:2422]			HALLMARK_OXIDATIVE_PHOSPHORYLATION	HALLMARK_ADIPOGENESIS
3945	LDHB	lactate dehydrogenase B [Source:HGNC Symbol;Acc:HGNC:6541]			HALLMARK_OXIDATIVE_PHOSPHORYLATION							HALLMARK_P53_PATHWAY
3032	HADHB	hydroxyacyl-CoA dehydrogenase trifunctional multienzyme complex subunit beta [Source:HGNC Symbol;Acc:HGNC:4803]			HALLMARK_OXIDATIVE_PHOSPHORYLATION								HALLMARK_FATTY_ACID_METABOLISM
37	ACADVL	acyl-CoA dehydrogenase very long chain [Source:HGNC Symbol;Acc:HGNC:92]			HALLMARK_OXIDATIVE_PHOSPHORYLATION								HALLMARK_FATTY_ACID_METABOLISM
4720	NDUFS2	NADH:ubiquinone oxidoreductase core subunit S2 [Source:HGNC Symbol;Acc:HGNC:7708]			HALLMARK_OXIDATIVE_PHOSPHORYLATION
26519	TIMM10	translocase of inner mitochondrial membrane 10 [Source:HGNC Symbol;Acc:HGNC:11814]			HALLMARK_OXIDATIVE_PHOSPHORYLATION
4723	NDUFV1	NADH:ubiquinone oxidoreductase core subunit V1 [Source:HGNC Symbol;Acc:HGNC:7716]			HALLMARK_OXIDATIVE_PHOSPHORYLATION
4729	NDUFV2	NADH:ubiquinone oxidoreductase core subunit V2 [Source:HGNC Symbol;Acc:HGNC:7717]			HALLMARK_OXIDATIVE_PHOSPHORYLATION
513	ATP5F1D	ATP synthase F1 subunit delta [Source:HGNC Symbol;Acc:HGNC:837]			HALLMARK_OXIDATIVE_PHOSPHORYLATION
527	ATP6V0C	ATPase H+ transporting V0 subunit c [Source:HGNC Symbol;Acc:HGNC:855]			HALLMARK_OXIDATIVE_PHOSPHORYLATION
8992	ATP6V0E1	ATPase H+ transporting V0 subunit e1 [Source:HGNC Symbol;Acc:HGNC:863]			HALLMARK_OXIDATIVE_PHOSPHORYLATION
92609	TIMM50	translocase of inner mitochondrial membrane 50 [Source:HGNC Symbol;Acc:HGNC:23656]			HALLMARK_OXIDATIVE_PHOSPHORYLATION
10113	PREB	prolactin regulatory element binding [Source:HGNC Symbol;Acc:HGNC:9356]				HALLMARK_ADIPOGENESIS				HALLMARK_UNFOLDED_PROTEIN_RESPONSE
8780	RIOK3	RIO kinase 3 [Source:HGNC Symbol;Acc:HGNC:11451]				HALLMARK_ADIPOGENESIS					HALLMARK_HEME_METABOLISM
10124	ARL4A	ADP ribosylation factor like GTPase 4A [Source:HGNC Symbol;Acc:HGNC:695]				HALLMARK_ADIPOGENESIS
123	PLIN2	perilipin 2 [Source:HGNC Symbol;Acc:HGNC:248]				HALLMARK_ADIPOGENESIS
11194	ABCB8	ATP binding cassette subfamily B member 8 [Source:HGNC Symbol;Acc:HGNC:49]				HALLMARK_ADIPOGENESIS
23344	ESYT1	extended synaptotagmin 1 [Source:HGNC Symbol;Acc:HGNC:29534]				HALLMARK_ADIPOGENESIS
334	APLP2	amyloid beta precursor like protein 2 [Source:HGNC Symbol;Acc:HGNC:598]				HALLMARK_ADIPOGENESIS
54996	MARC2	mitochondrial amidoxime reducing component 2 [Source:HGNC Symbol;Acc:HGNC:26064]				HALLMARK_ADIPOGENESIS
56894	AGPAT3	1-acylglycerol-3-phosphate O-acyltransferase 3 [Source:HGNC Symbol;Acc:HGNC:326]				HALLMARK_ADIPOGENESIS
977	CD151	CD151 molecule (Raph blood group) [Source:HGNC Symbol;Acc:HGNC:1630]				HALLMARK_ADIPOGENESIS
7272	TTK	TTK protein kinase [Source:HGNC Symbol;Acc:HGNC:12401]					HALLMARK_G2M_CHECKPOINT	HALLMARK_MITOTIC_SPINDLE
6713	SQLE	squalene epoxidase [Source:HGNC Symbol;Acc:HGNC:11279]					HALLMARK_G2M_CHECKPOINT		HALLMARK_MTORC1_SIGNALING
899	CCNF	cyclin F [Source:HGNC Symbol;Acc:HGNC:1591]					HALLMARK_G2M_CHECKPOINT		HALLMARK_MTORC1_SIGNALING
1736	DKC1	dyskerin pseudouridine synthase 1 [Source:HGNC Symbol;Acc:HGNC:2890]					HALLMARK_G2M_CHECKPOINT			HALLMARK_UNFOLDED_PROTEIN_RESPONSE
10036	CHAF1A	chromatin assembly factor 1 subunit A [Source:HGNC Symbol;Acc:HGNC:1910]					HALLMARK_G2M_CHECKPOINT
55872	PBK	PDZ binding kinase [Source:HGNC Symbol;Acc:HGNC:18282]					HALLMARK_G2M_CHECKPOINT
6709	SPTAN1	spectrin alpha, non-erythrocytic 1 [Source:HGNC Symbol;Acc:HGNC:11273]						HALLMARK_MITOTIC_SPINDLE
11064	CNTRL	centriolin [Source:HGNC Symbol;Acc:HGNC:1858]						HALLMARK_MITOTIC_SPINDLE
22920	KIFAP3	kinesin associated protein 3 [Source:HGNC Symbol;Acc:HGNC:17060]						HALLMARK_MITOTIC_SPINDLE
22930	RAB3GAP1	RAB3 GTPase activating protein catalytic subunit 1 [Source:HGNC Symbol;Acc:HGNC:17063]						HALLMARK_MITOTIC_SPINDLE
51174	TUBD1	tubulin delta 1 [Source:HGNC Symbol;Acc:HGNC:16811]						HALLMARK_MITOTIC_SPINDLE
55201	MAP1S	microtubule associated protein 1S [Source:HGNC Symbol;Acc:HGNC:15715]						HALLMARK_MITOTIC_SPINDLE
23478	SEC11A	SEC11 homolog A, signal peptidase complex subunit [Source:HGNC Symbol;Acc:HGNC:17718]							HALLMARK_MTORC1_SIGNALING	HALLMARK_UNFOLDED_PROTEIN_RESPONSE
23657	SLC7A11	solute carrier family 7 member 11 [Source:HGNC Symbol;Acc:HGNC:11059]							HALLMARK_MTORC1_SIGNALING		HALLMARK_HEME_METABOLISM	HALLMARK_P53_PATHWAY
6513	SLC2A1	solute carrier family 2 member 1 [Source:HGNC Symbol;Acc:HGNC:11005]							HALLMARK_MTORC1_SIGNALING		HALLMARK_HEME_METABOLISM
26471	NUPR1	nuclear protein 1, transcriptional regulator [Source:HGNC Symbol;Acc:HGNC:29990]							HALLMARK_MTORC1_SIGNALING			HALLMARK_P53_PATHWAY
7167	TPI1	triosephosphate isomerase 1 [Source:HGNC Symbol;Acc:HGNC:12009]							HALLMARK_MTORC1_SIGNALING
3949	LDLR	low density lipoprotein receptor [Source:HGNC Symbol;Acc:HGNC:6547]							HALLMARK_MTORC1_SIGNALING
10963	STIP1	stress induced phosphoprotein 1 [Source:HGNC Symbol;Acc:HGNC:11387]							HALLMARK_MTORC1_SIGNALING
10897	YIF1A	Yip1 interacting factor homolog A, membrane trafficking protein [Source:HGNC Symbol;Acc:HGNC:16688]								HALLMARK_UNFOLDED_PROTEIN_RESPONSE
25804	LSM4	LSM4 homolog, U6 small nuclear RNA and mRNA degradation associated [Source:NCBI gene;Acc:25804]								HALLMARK_UNFOLDED_PROTEIN_RESPONSE
8602	NOP14	NOP14 nucleolar protein [Source:HGNC Symbol;Acc:HGNC:16821]								HALLMARK_UNFOLDED_PROTEIN_RESPONSE
9114	ATP6V0D1	ATPase H+ transporting V0 subunit d1 [Source:HGNC Symbol;Acc:HGNC:13724]								HALLMARK_UNFOLDED_PROTEIN_RESPONSE
896	CCND3	cyclin D3 [Source:HGNC Symbol;Acc:HGNC:1585]									HALLMARK_HEME_METABOLISM	HALLMARK_P53_PATHWAY
645	BLVRB	biliverdin reductase B [Source:HGNC Symbol;Acc:HGNC:1063]									HALLMARK_HEME_METABOLISM
8031	NCOA4	nuclear receptor coactivator 4 [Source:HGNC Symbol;Acc:HGNC:7671]									HALLMARK_HEME_METABOLISM
3029	HAGH	hydroxyacylglutathione hydrolase [Source:HGNC Symbol;Acc:HGNC:4805]									HALLMARK_HEME_METABOLISM
9091	PIGQ	phosphatidylinositol glycan anchor biosynthesis class Q [Source:HGNC Symbol;Acc:HGNC:14135]									HALLMARK_HEME_METABOLISM
29927	SEC61A1	Sec61 translocon alpha 1 subunit [Source:HGNC Symbol;Acc:HGNC:18276]										HALLMARK_P53_PATHWAY
6890	TAP1	transporter 1, ATP binding cassette subfamily B member [Source:HGNC Symbol;Acc:HGNC:43]										HALLMARK_P53_PATHWAY
23654	PLXNB2	plexin B2 [Source:HGNC Symbol;Acc:HGNC:9104]										HALLMARK_P53_PATHWAY
25898	RCHY1	ring finger and CHY zinc finger domain containing 1 [Source:HGNC Symbol;Acc:HGNC:17479]										HALLMARK_P53_PATHWAY
5720	PSME1	proteasome activator subunit 1 [Source:HGNC Symbol;Acc:HGNC:9568]											HALLMARK_FATTY_ACID_METABOLISM
158	ADSL	adenylosuccinate lyase [Source:HGNC Symbol;Acc:HGNC:291]											HALLMARK_FATTY_ACID_METABOLISM
2954	GSTZ1	glutathione S-transferase zeta 1 [Source:HGNC Symbol;Acc:HGNC:4643]											HALLMARK_FATTY_ACID_METABOLISM
5576	PRKAR2A	protein kinase cAMP-dependent type II regulatory subunit alpha [Source:HGNC Symbol;Acc:HGNC:9391]
54760	PCSK4	proprotein convertase subtilisin/kexin type 4 [Source:HGNC Symbol;Acc:HGNC:8746]
4350	MPG	N-methylpurine DNA glycosylase [Source:HGNC Symbol;Acc:HGNC:7211]
4833	NME4	NME/NM23 nucleoside diphosphate kinase 4 [Source:HGNC Symbol;Acc:HGNC:7852]
5430	POLR2A	RNA polymerase II subunit A [Source:HGNC Symbol;Acc:HGNC:9187]
9013	TAF1C	TATA-box binding protein associated factor, RNA polymerase I subunit C [Source:HGNC Symbol;Acc:HGNC:11534]
4351	MPI	mannose phosphate isomerase [Source:HGNC Symbol;Acc:HGNC:7216]
9215	LARGE1	LARGE xylosyl- and glucuronyltransferase 1 [Source:HGNC Symbol;Acc:HGNC:6511]
25819	NOCT	nocturnin [Source:HGNC Symbol;Acc:HGNC:14254]
3219	HOXB9	homeobox B9 [Source:HGNC Symbol;Acc:HGNC:5120]
71	ACTG1	actin gamma 1 [Source:HGNC Symbol;Acc:HGNC:144]
10075	HUWE1	HECT, UBA and WWE domain containing E3 ubiquitin protein ligase 1 [Source:HGNC Symbol;Acc:HGNC:30892]
11230	PRAF2	PRA1 domain family member 2 [Source:HGNC Symbol;Acc:HGNC:28911]
55509	BATF3	basic leucine zipper ATF-like transcription factor 3 [Source:HGNC Symbol;Acc:HGNC:28915]
28959	TMEM176B	transmembrane protein 176B [Source:HGNC Symbol;Acc:HGNC:29596]
5950	RBP4	retinol binding protein 4 [Source:HGNC Symbol;Acc:HGNC:9922]
5696	PSMB8	proteasome subunit beta 8 [Source:HGNC Symbol;Acc:HGNC:9545]
11179	ZNF277	zinc finger protein 277 [Source:HGNC Symbol;Acc:HGNC:13070]
163590	TOR1AIP2	torsin 1A interacting protein 2 [Source:HGNC Symbol;Acc:HGNC:24055]
84869	CBR4	carbonyl reductase 4 [Source:HGNC Symbol;Acc:HGNC:25891]
10857	PGRMC1	progesterone receptor membrane component 1 [Source:HGNC Symbol;Acc:HGNC:16090]
5730	PTGDS	prostaglandin D2 synthase [Source:HGNC Symbol;Acc:HGNC:9592]
8729	GBF1	golgi brefeldin A resistant guanine nucleotide exchange factor 1 [Source:HGNC Symbol;Acc:HGNC:4181]
8775	NAPA	NSF attachment protein alpha [Source:HGNC Symbol;Acc:HGNC:7641]
9554	SEC22B	SEC22 homolog B, vesicle trafficking protein (gene/pseudogene) [Source:HGNC Symbol;Acc:HGNC:10700]
60386	SLC25A19	solute carrier family 25 member 19 [Source:HGNC Symbol;Acc:HGNC:14409]
5789	PTPRD	protein tyrosine phosphatase receptor type D [Source:HGNC Symbol;Acc:HGNC:9668]
988	CDC5L	cell division cycle 5 like [Source:HGNC Symbol;Acc:HGNC:1743]
7077	TIMP2	TIMP metallopeptidase inhibitor 2 [Source:HGNC Symbol;Acc:HGNC:11821]
2944	GSTM1	glutathione S-transferase mu 1 [Source:HGNC Symbol;Acc:HGNC:4632]
6728	SRP19	signal recognition particle 19 [Source:HGNC Symbol;Acc:HGNC:11300]
2281	FKBP1B	FKBP prolyl isomerase 1B [Source:HGNC Symbol;Acc:HGNC:3712]
7054	TH	tyrosine hydroxylase [Source:HGNC Symbol;Acc:HGNC:11782]
273	AMPH	amphiphysin [Source:HGNC Symbol;Acc:HGNC:471]
2764	GMFB	glia maturation factor beta [Source:HGNC Symbol;Acc:HGNC:4373]
1314	COPA	coatomer protein complex subunit alpha [Source:HGNC Symbol;Acc:HGNC:2230]
55315	SLC29A3	solute carrier family 29 member 3 [Source:HGNC Symbol;Acc:HGNC:23096]
5494	PPM1A	protein phosphatase, Mg2+/Mn2+ dependent 1A [Source:HGNC Symbol;Acc:HGNC:9275]
10402	ST3GAL6	ST3 beta-galactoside alpha-2,3-sialyltransferase 6 [Source:HGNC Symbol;Acc:HGNC:18080]
10011	SRA1	steroid receptor RNA activator 1 [Source:HGNC Symbol;Acc:HGNC:11281]
100505876	CEBPZOS	CEBPZ opposite strand [Source:HGNC Symbol;Acc:HGNC:49288]
10166	SLC25A15	solute carrier family 25 member 15 [Source:HGNC Symbol;Acc:HGNC:10985]
10211	FLOT1	flotillin 1 [Source:HGNC Symbol;Acc:HGNC:3757]
10263	CDK2AP2	cyclin dependent kinase 2 associated protein 2 [Source:HGNC Symbol;Acc:HGNC:30833]
10284	SAP18	Sin3A associated protein 18 [Source:HGNC Symbol;Acc:HGNC:10530]
10311	VPS26C	VPS26 endosomal protein sorting factor C [Source:HGNC Symbol;Acc:HGNC:3044]
10519	CIB1	calcium and integrin binding 1 [Source:HGNC Symbol;Acc:HGNC:16920]
10523	CHERP	calcium homeostasis endoplasmic reticulum protein [Source:HGNC Symbol;Acc:HGNC:16930]
10540	DCTN2	dynactin subunit 2 [Source:HGNC Symbol;Acc:HGNC:2712]
10556	RPP30	ribonuclease P/MRP subunit p30 [Source:HGNC Symbol;Acc:HGNC:17688]
10618	TGOLN2	trans-golgi network protein 2 [Source:HGNC Symbol;Acc:HGNC:15450]
10671	DCTN6	dynactin subunit 6 [Source:HGNC Symbol;Acc:HGNC:16964]
10694	CCT8	chaperonin containing TCP1 subunit 8 [Source:HGNC Symbol;Acc:HGNC:1623]
10814	CPLX2	complexin 2 [Source:HGNC Symbol;Acc:HGNC:2310]
10899	JTB	jumping translocation breakpoint [Source:HGNC Symbol;Acc:HGNC:6201]
10944	C11orf58	chromosome 11 open reading frame 58 [Source:HGNC Symbol;Acc:HGNC:16990]
11021	RAB35	RAB35, member RAS oncogene family [Source:HGNC Symbol;Acc:HGNC:9774]
11236	RNF139	ring finger protein 139 [Source:HGNC Symbol;Acc:HGNC:17023]
11276	SYNRG	synergin gamma [Source:HGNC Symbol;Acc:HGNC:557]
112812	FDX2	ferredoxin 2 [Source:HGNC Symbol;Acc:HGNC:30546]
11329	STK38	serine/threonine kinase 38 [Source:HGNC Symbol;Acc:HGNC:17847]
113444	SMIM12	small integral membrane protein 12 [Source:HGNC Symbol;Acc:HGNC:25154]
113791	PIK3IP1	phosphoinositide-3-kinase interacting protein 1 [Source:HGNC Symbol;Acc:HGNC:24942]
123169	LEO1	LEO1 homolog, Paf1/RNA polymerase II complex component [Source:HGNC Symbol;Acc:HGNC:30401]
124446	TMEM219	transmembrane protein 219 [Source:HGNC Symbol;Acc:HGNC:25201]
125150	ZSWIM7	zinc finger SWIM-type containing 7 [Source:HGNC Symbol;Acc:HGNC:26993]
129401	NUP35	nucleoporin 35 [Source:HGNC Symbol;Acc:HGNC:29797]
134553	C5orf24	chromosome 5 open reading frame 24 [Source:HGNC Symbol;Acc:HGNC:26746]
134637	ADAT2	adenosine deaminase tRNA specific 2 [Source:HGNC Symbol;Acc:HGNC:21172]
138639	PTPDC1	protein tyrosine phosphatase domain containing 1 [Source:HGNC Symbol;Acc:HGNC:30184]
145389	SLC38A6	solute carrier family 38 member 6 [Source:HGNC Symbol;Acc:HGNC:19863]
152519	NIPAL1	NIPA like domain containing 1 [Source:HGNC Symbol;Acc:HGNC:27194]
155066	ATP6V0E2	ATPase H+ transporting V0 subunit e2 [Source:HGNC Symbol;Acc:HGNC:21723]
1653	DDX1	DEAD-box helicase 1 [Source:HGNC Symbol;Acc:HGNC:2734]
1802	DPH2	diphthamide biosynthesis 2 [Source:HGNC Symbol;Acc:HGNC:3004]
1850	DUSP8	dual specificity phosphatase 8 [Source:HGNC Symbol;Acc:HGNC:3074]
200014	CC2D1B	coiled-coil and C2 domain containing 1B [Source:HGNC Symbol;Acc:HGNC:29386]
201931	TMEM192	transmembrane protein 192 [Source:HGNC Symbol;Acc:HGNC:26775]
2036	EPB41L1	erythrocyte membrane protein band 4.1 like 1 [Source:HGNC Symbol;Acc:HGNC:3378]
2098	ESD	esterase D [Source:HGNC Symbol;Acc:HGNC:3465]
2166	FAAH	fatty acid amide hydrolase [Source:HGNC Symbol;Acc:HGNC:3553]
2178	FANCE	FA complementation group E [Source:HGNC Symbol;Acc:HGNC:3586]
221421	RSPH9	radial spoke head 9 homolog [Source:HGNC Symbol;Acc:HGNC:21057]
221443	OARD1	O-acyl-ADP-ribose deacylase 1 [Source:HGNC Symbol;Acc:HGNC:21257]
22794	CASC3	CASC3 exon junction complex subunit [Source:HGNC Symbol;Acc:HGNC:17040]
22881	ANKRD6	ankyrin repeat domain 6 [Source:HGNC Symbol;Acc:HGNC:17280]
22938	SNW1	SNW domain containing 1 [Source:HGNC Symbol;Acc:HGNC:16696]
22954	TRIM32	tripartite motif containing 32 [Source:HGNC Symbol;Acc:HGNC:16380]
23	ABCF1	ATP binding cassette subfamily F member 1 [Source:HGNC Symbol;Acc:HGNC:70]
23020	SNRNP200	small nuclear ribonucleoprotein U5 subunit 200 [Source:HGNC Symbol;Acc:HGNC:30859]
23023	TMCC1	transmembrane and coiled-coil domain family 1 [Source:HGNC Symbol;Acc:HGNC:29116]
23074	UHRF1BP1L	UHRF1 binding protein 1 like [Source:HGNC Symbol;Acc:HGNC:29102]
23309	SIN3B	SIN3 transcription regulator family member B [Source:HGNC Symbol;Acc:HGNC:19354]
23354	HAUS5	HAUS augmin like complex subunit 5 [Source:HGNC Symbol;Acc:HGNC:29130]
23410	SIRT3	sirtuin 3 [Source:HGNC Symbol;Acc:HGNC:14931]
23451	SF3B1	splicing factor 3b subunit 1 [Source:HGNC Symbol;Acc:HGNC:10768]
23509	POFUT1	protein O-fucosyltransferase 1 [Source:HGNC Symbol;Acc:HGNC:14988]
23560	GTPBP4	GTP binding protein 4 [Source:HGNC Symbol;Acc:HGNC:21535]
23587	ELP5	elongator acetyltransferase complex subunit 5 [Source:HGNC Symbol;Acc:HGNC:30617]
23588	KLHDC2	kelch domain containing 2 [Source:HGNC Symbol;Acc:HGNC:20231]
23595	ORC3	origin recognition complex subunit 3 [Source:HGNC Symbol;Acc:HGNC:8489]
23620	NTSR2	neurotensin receptor 2 [Source:HGNC Symbol;Acc:HGNC:8040]
23635	SSBP2	single stranded DNA binding protein 2 [Source:HGNC Symbol;Acc:HGNC:15831]
256281	NUDT14	nudix hydrolase 14 [Source:HGNC Symbol;Acc:HGNC:20141]
25814	ATXN10	ataxin 10 [Source:HGNC Symbol;Acc:HGNC:10549]
25917	THUMPD3	THUMP domain containing 3 [Source:HGNC Symbol;Acc:HGNC:24493]
25941	TPGS2	tubulin polyglutamylase complex subunit 2 [Source:HGNC Symbol;Acc:HGNC:24561]
25942	SIN3A	SIN3 transcription regulator family member A [Source:HGNC Symbol;Acc:HGNC:19353]
25973	PARS2	prolyl-tRNA synthetase 2, mitochondrial [Source:HGNC Symbol;Acc:HGNC:30563]
26024	PTCD1	pentatricopeptide repeat domain 1 [Source:HGNC Symbol;Acc:HGNC:22198]
26173	INTS1	integrator complex subunit 1 [Source:HGNC Symbol;Acc:HGNC:24555]
2642	GCGR	glucagon receptor [Source:HGNC Symbol;Acc:HGNC:4192]
27034	ACAD8	acyl-CoA dehydrogenase family member 8 [Source:HGNC Symbol;Acc:HGNC:87]
27241	BBS9	Bardet-Biedl syndrome 9 [Source:HGNC Symbol;Acc:HGNC:30000]
27249	MMADHC	metabolism of cobalamin associated D [Source:HGNC Symbol;Acc:HGNC:25221]
2733	GLE1	GLE1 RNA export mediator [Source:HGNC Symbol;Acc:HGNC:4315]
27352	SGSM3	small G protein signaling modulator 3 [Source:HGNC Symbol;Acc:HGNC:25228]
284716	RIMKLA	ribosomal modification protein rimK like family member A [Source:HGNC Symbol;Acc:HGNC:28725]
28969	BZW2	basic leucine zipper and W2 domains 2 [Source:HGNC Symbol;Acc:HGNC:18808]
28971	AAMDC	adipogenesis associated Mth938 domain containing [Source:HGNC Symbol;Acc:HGNC:30205]
28974	C19orf53	chromosome 19 open reading frame 53 [Source:HGNC Symbol;Acc:HGNC:24991]
28988	DBNL	drebrin like [Source:HGNC Symbol;Acc:HGNC:2696]
29093	MRPL22	mitochondrial ribosomal protein L22 [Source:HGNC Symbol;Acc:HGNC:14480]
29101	SSU72	SSU72 homolog, RNA polymerase II CTD phosphatase [Source:HGNC Symbol;Acc:HGNC:25016]
29115	SAP30BP	SAP30 binding protein [Source:HGNC Symbol;Acc:HGNC:30785]
2923	PDIA3	protein disulfide isomerase family A member 3 [Source:HGNC Symbol;Acc:HGNC:4606]
2976	GTF3C2	general transcription factor IIIC subunit 2 [Source:HGNC Symbol;Acc:HGNC:4665]
29902	FAM216A	family with sequence similarity 216 member A [Source:HGNC Symbol;Acc:HGNC:30180]
29923	HILPDA	hypoxia inducible lipid droplet associated [Source:HGNC Symbol;Acc:HGNC:28859]
3185	HNRNPF	heterogeneous nuclear ribonucleoprotein F [Source:HGNC Symbol;Acc:HGNC:5039]
348262	MCRIP1	MAPK regulated corepressor interacting protein 1 [Source:HGNC Symbol;Acc:HGNC:28007]
3622	ING2	inhibitor of growth family member 2 [Source:HGNC Symbol;Acc:HGNC:6063]
3692	EIF6	eukaryotic translation initiation factor 6 [Source:HGNC Symbol;Acc:HGNC:6159]
375444	C5orf34	chromosome 5 open reading frame 34 [Source:HGNC Symbol;Acc:HGNC:24738]
389203	SMIM20	small integral membrane protein 20 [Source:HGNC Symbol;Acc:HGNC:37260]
392	ARHGAP1	Rho GTPase activating protein 1 [Source:HGNC Symbol;Acc:HGNC:673]
400745	SH2D5	SH2 domain containing 5 [Source:HGNC Symbol;Acc:HGNC:28819]
402055	SRRD	SRR1 domain containing [Source:HGNC Symbol;Acc:HGNC:33910]
4152	MBD1	methyl-CpG binding domain protein 1 [Source:HGNC Symbol;Acc:HGNC:6916]
4298	MLLT1	MLLT1 super elongation complex subunit [Source:HGNC Symbol;Acc:HGNC:7134]
4670	HNRNPM	heterogeneous nuclear ribonucleoprotein M [Source:HGNC Symbol;Acc:HGNC:5046]
4725	NDUFS5	NADH:ubiquinone oxidoreductase subunit S5 [Source:HGNC Symbol;Acc:HGNC:7712]
473	RERE	arginine-glutamic acid dipeptide repeats [Source:HGNC Symbol;Acc:HGNC:9965]
4733	DRG1	developmentally regulated GTP binding protein 1 [Source:HGNC Symbol;Acc:HGNC:3029]
4796	TONSL	tonsoku like, DNA repair protein [Source:HGNC Symbol;Acc:HGNC:7801]
4856	CCN3	cellular communication network factor 3 [Source:HGNC Symbol;Acc:HGNC:7885]
4884	NPTX1	neuronal pentraxin 1 [Source:NCBI gene;Acc:4884]
50511	SYCP3	synaptonemal complex protein 3 [Source:HGNC Symbol;Acc:HGNC:18130]
51074	APIP	APAF1 interacting protein [Source:HGNC Symbol;Acc:HGNC:17581]
51077	FCF1	FCF1 rRNA-processing protein [Source:HGNC Symbol;Acc:HGNC:20220]
51175	TUBE1	tubulin epsilon 1 [Source:HGNC Symbol;Acc:HGNC:20775]
51329	ARL6IP4	ADP ribosylation factor like GTPase 6 interacting protein 4 [Source:HGNC Symbol;Acc:HGNC:18076]
51428	DDX41	DEAD-box helicase 41 [Source:HGNC Symbol;Acc:HGNC:18674]
51439	FAM8A1	family with sequence similarity 8 member A1 [Source:HGNC Symbol;Acc:HGNC:16372]
51506	UFC1	ubiquitin-fold modifier conjugating enzyme 1 [Source:HGNC Symbol;Acc:HGNC:26941]
51645	PPIL1	peptidylprolyl isomerase like 1 [Source:HGNC Symbol;Acc:HGNC:9260]
51692	CPSF3	cleavage and polyadenylation specific factor 3 [Source:HGNC Symbol;Acc:HGNC:2326]
5201	PFDN1	prefoldin subunit 1 [Source:HGNC Symbol;Acc:HGNC:8866]
5203	PFDN4	prefoldin subunit 4 [Source:HGNC Symbol;Acc:HGNC:8868]
5336	PLCG2	phospholipase C gamma 2 [Source:NCBI gene;Acc:5336]
53981	CPSF2	cleavage and polyadenylation specific factor 2 [Source:HGNC Symbol;Acc:HGNC:2325]
54442	KCTD5	potassium channel tetramerization domain containing 5 [Source:HGNC Symbol;Acc:HGNC:21423]
54478	PIMREG	PICALM interacting mitotic regulator [Source:HGNC Symbol;Acc:HGNC:25483]
54758	KLHDC4	kelch domain containing 4 [Source:HGNC Symbol;Acc:HGNC:25272]
54765	TRIM44	tripartite motif containing 44 [Source:HGNC Symbol;Acc:HGNC:19016]
54867	TMEM214	transmembrane protein 214 [Source:HGNC Symbol;Acc:HGNC:25983]
54878	DPP8	dipeptidyl peptidase 8 [Source:HGNC Symbol;Acc:HGNC:16490]
54879	ST7L	suppression of tumorigenicity 7 like [Source:HGNC Symbol;Acc:HGNC:18441]
5501	PPP1CC	protein phosphatase 1 catalytic subunit gamma [Source:HGNC Symbol;Acc:HGNC:9283]
55164	SHQ1	SHQ1, H/ACA ribonucleoprotein assembly factor [Source:HGNC Symbol;Acc:HGNC:25543]
5518	PPP2R1A	protein phosphatase 2 scaffold subunit Aalpha [Source:HGNC Symbol;Acc:HGNC:9302]
55193	PBRM1	polybromo 1 [Source:HGNC Symbol;Acc:HGNC:30064]
55268	ECHDC2	enoyl-CoA hydratase domain containing 2 [Source:HGNC Symbol;Acc:HGNC:23408]
5537	PPP6C	protein phosphatase 6 catalytic subunit [Source:HGNC Symbol;Acc:HGNC:9323]
55565	ZNF821	zinc finger protein 821 [Source:HGNC Symbol;Acc:HGNC:28043]
55718	POLR3E	RNA polymerase III subunit E [Source:HGNC Symbol;Acc:HGNC:30347]
55898	UNC45A	unc-45 myosin chaperone A [Source:HGNC Symbol;Acc:HGNC:30594]
55954	ZMAT5	zinc finger matrin-type 5 [Source:HGNC Symbol;Acc:HGNC:28046]
55973	BCAP29	B cell receptor associated protein 29 [Source:HGNC Symbol;Acc:HGNC:24131]
56672	AKIP1	A-kinase interacting protein 1 [Source:HGNC Symbol;Acc:HGNC:1170]
56912	IFT46	intraflagellar transport 46 [Source:HGNC Symbol;Acc:HGNC:26146]
5692	PSMB4	proteasome subunit beta 4 [Source:HGNC Symbol;Acc:HGNC:9541]
56927	GPR108	G protein-coupled receptor 108 [Source:HGNC Symbol;Acc:HGNC:17829]
56953	NT5M	5',3'-nucleotidase, mitochondrial [Source:HGNC Symbol;Acc:HGNC:15769]
57019	CIAPIN1	cytokine induced apoptosis inhibitor 1 [Source:HGNC Symbol;Acc:HGNC:28050]
57129	MRPL47	mitochondrial ribosomal protein L47 [Source:HGNC Symbol;Acc:HGNC:16652]
57168	ASPHD2	aspartate beta-hydroxylase domain containing 2 [Source:HGNC Symbol;Acc:HGNC:30437]
57215	THAP11	THAP domain containing 11 [Source:HGNC Symbol;Acc:HGNC:23194]
57469	PNMA8B	PNMA family member 8B [Source:HGNC Symbol;Acc:HGNC:29206]
57498	KIDINS220	kinase D interacting substrate 220 [Source:HGNC Symbol;Acc:HGNC:29508]
57506	MAVS	mitochondrial antiviral signaling protein [Source:HGNC Symbol;Acc:HGNC:29233]
57526	PCDH19	protocadherin 19 [Source:HGNC Symbol;Acc:HGNC:14270]
57577	CCDC191	coiled-coil domain containing 191 [Source:HGNC Symbol;Acc:HGNC:29272]
57613	FAM234B	family with sequence similarity 234 member B [Source:HGNC Symbol;Acc:HGNC:29288]
57722	IGDCC4	immunoglobulin superfamily DCC subclass member 4 [Source:HGNC Symbol;Acc:HGNC:13770]
5930	RBBP6	RB binding protein 6, ubiquitin ligase [Source:HGNC Symbol;Acc:HGNC:9889]
60488	MRPS35	mitochondrial ribosomal protein S35 [Source:HGNC Symbol;Acc:HGNC:16635]
60682	SMAP1	small ArfGAP 1 [Source:HGNC Symbol;Acc:HGNC:19651]
617	BCS1L	BCS1 homolog, ubiquinol-cytochrome c reductase complex chaperone [Source:HGNC Symbol;Acc:HGNC:1020]
6181	RPLP2	ribosomal protein lateral stalk subunit P2 [Source:HGNC Symbol;Acc:HGNC:10377]
6231	RPS26	ribosomal protein S26 [Source:HGNC Symbol;Acc:HGNC:10414]
6400	SEL1L	SEL1L adaptor subunit of ERAD E3 ubiquitin ligase [Source:HGNC Symbol;Acc:HGNC:10717]
64410	KLHL25	kelch like family member 25 [Source:HGNC Symbol;Acc:HGNC:25732]
64777	RMND5B	required for meiotic nuclear division 5 homolog B [Source:HGNC Symbol;Acc:HGNC:26181]
64789	EXO5	exonuclease 5 [Source:HGNC Symbol;Acc:HGNC:26115]
64834	ELOVL1	ELOVL fatty acid elongase 1 [Source:HGNC Symbol;Acc:HGNC:14418]
64901	RANBP17	RAN binding protein 17 [Source:HGNC Symbol;Acc:HGNC:14428]
64975	MRPL41	mitochondrial ribosomal protein L41 [Source:HGNC Symbol;Acc:HGNC:14492]
6729	SRP54	signal recognition particle 54 [Source:HGNC Symbol;Acc:HGNC:11301]
6794	STK11	serine/threonine kinase 11 [Source:HGNC Symbol;Acc:HGNC:11389]
6835	SURF2	surfeit 2 [Source:HGNC Symbol;Acc:HGNC:11475]
6854	SYN2	synapsin II [Source:HGNC Symbol;Acc:HGNC:11495]
6993	DYNLT1	dynein light chain Tctex-type 1 [Source:HGNC Symbol;Acc:HGNC:11697]
7019	TFAM	transcription factor A, mitochondrial [Source:HGNC Symbol;Acc:HGNC:11741]
7165	TPD52L2	TPD52 like 2 [Source:HGNC Symbol;Acc:HGNC:12007]
7265	TTC1	tetratricopeptide repeat domain 1 [Source:HGNC Symbol;Acc:HGNC:12391]
7286	TUFT1	tuftelin 1 [Source:HGNC Symbol;Acc:HGNC:12422]
729515	TMEM242	transmembrane protein 242 [Source:HGNC Symbol;Acc:HGNC:17206]
740	MRPL49	mitochondrial ribosomal protein L49 [Source:HGNC Symbol;Acc:HGNC:1176]
7580	ZNF32	zinc finger protein 32 [Source:HGNC Symbol;Acc:HGNC:13095]
7763	ZFAND5	zinc finger AN1-type containing 5 [Source:HGNC Symbol;Acc:HGNC:13008]
7786	MAP3K12	mitogen-activated protein kinase kinase kinase 12 [Source:HGNC Symbol;Acc:HGNC:6851]
7837	PXDN	peroxidasin [Source:HGNC Symbol;Acc:HGNC:14966]
78997	GDAP1L1	ganglioside induced differentiation associated protein 1 like 1 [Source:HGNC Symbol;Acc:HGNC:4213]
79005	SCNM1	sodium channel modifier 1 [Source:HGNC Symbol;Acc:HGNC:23136]
79017	GGCT	gamma-glutamylcyclotransferase [Source:HGNC Symbol;Acc:HGNC:21705]
79078	C1orf50	chromosome 1 open reading frame 50 [Source:HGNC Symbol;Acc:HGNC:28795]
79140	CCDC28B	coiled-coil domain containing 28B [Source:HGNC Symbol;Acc:HGNC:28163]
79144	PPDPF	pancreatic progenitor cell differentiation and proliferation factor [Source:HGNC Symbol;Acc:HGNC:16142]
79184	BRCC3	BRCA1/BRCA2-containing complex subunit 3 [Source:HGNC Symbol;Acc:HGNC:24185]
79364	ZXDC	ZXD family zinc finger C [Source:HGNC Symbol;Acc:HGNC:28160]
79587	CARS2	cysteinyl-tRNA synthetase 2, mitochondrial [Source:HGNC Symbol;Acc:HGNC:25695]
79801	SHCBP1	SHC binding and spindle associated 1 [Source:HGNC Symbol;Acc:HGNC:29547]
80169	CTC1	CST telomere replication complex component 1 [Source:HGNC Symbol;Acc:HGNC:26169]
8019	BRD3	bromodomain containing 3 [Source:HGNC Symbol;Acc:HGNC:1104]
80210	ARMC9	armadillo repeat containing 9 [Source:HGNC Symbol;Acc:HGNC:20730]
80820	EEPD1	endonuclease/exonuclease/phosphatase family domain containing 1 [Source:HGNC Symbol;Acc:HGNC:22223]
81631	MAP1LC3B	microtubule associated protein 1 light chain 3 beta [Source:HGNC Symbol;Acc:HGNC:13352]
81839	VANGL1	VANGL planar cell polarity protein 1 [Source:HGNC Symbol;Acc:HGNC:15512]
81844	TRIM56	tripartite motif containing 56 [Source:HGNC Symbol;Acc:HGNC:19028]
8190	MIA	MIA SH3 domain containing [Source:HGNC Symbol;Acc:HGNC:7076]
8233	ZRSR2	zinc finger CCCH-type, RNA binding motif and serine/arginine rich 2 [Source:HGNC Symbol;Acc:HGNC:23019]
83541	FAM110A	family with sequence similarity 110 member A [Source:HGNC Symbol;Acc:HGNC:16188]
83693	HSDL1	hydroxysteroid dehydrogenase like 1 [Source:HGNC Symbol;Acc:HGNC:16475]
83854	ANGPTL6	angiopoietin like 6 [Source:HGNC Symbol;Acc:HGNC:23140]
84058	WDR54	WD repeat domain 54 [Source:HGNC Symbol;Acc:HGNC:25770]
84134	TOMM40L	translocase of outer mitochondrial membrane 40 like [Source:HGNC Symbol;Acc:HGNC:25756]
84186	ZCCHC7	zinc finger CCHC-type containing 7 [Source:HGNC Symbol;Acc:HGNC:26209]
84231	TRAF7	TNF receptor associated factor 7 [Source:HGNC Symbol;Acc:HGNC:20456]
84262	PSMG3	proteasome assembly chaperone 3 [Source:HGNC Symbol;Acc:HGNC:22420]
84324	SARNP	SAP domain containing ribonucleoprotein [Source:HGNC Symbol;Acc:HGNC:24432]
84461	NEURL4	neuralized E3 ubiquitin protein ligase 4 [Source:HGNC Symbol;Acc:HGNC:34410]
84498	FAM120B	family with sequence similarity 120B [Source:HGNC Symbol;Acc:HGNC:21109]
84790	TUBA1C	tubulin alpha 1c [Source:HGNC Symbol;Acc:HGNC:20768]
84838	ZNF496	zinc finger protein 496 [Source:HGNC Symbol;Acc:HGNC:23713]
84861	KLHL22	kelch like family member 22 [Source:HGNC Symbol;Acc:HGNC:25888]
84879	MFSD2A	major facilitator superfamily domain containing 2A [Source:HGNC Symbol;Acc:HGNC:25897]
84902	CEP89	centrosomal protein 89 [Source:HGNC Symbol;Acc:HGNC:25907]
84905	ZNF341	zinc finger protein 341 [Source:HGNC Symbol;Acc:HGNC:15992]
84909	AOPEP	aminopeptidase O (putative) [Source:HGNC Symbol;Acc:HGNC:1361]
84922	FIZ1	FLT3 interacting zinc finger 1 [Source:HGNC Symbol;Acc:HGNC:25917]
8520	HAT1	histone acetyltransferase 1 [Source:HGNC Symbol;Acc:HGNC:4821]
85395	FAM207A	family with sequence similarity 207 member A [Source:HGNC Symbol;Acc:HGNC:15811]
8724	SNX3	sorting nexin 3 [Source:HGNC Symbol;Acc:HGNC:11174]
8887	TAX1BP1	Tax1 binding protein 1 [Source:HGNC Symbol;Acc:HGNC:11575]
8888	MCM3AP	minichromosome maintenance complex component 3 associated protein [Source:HGNC Symbol;Acc:HGNC:6946]
90353	CTU1	cytosolic thiouridylase subunit 1 [Source:HGNC Symbol;Acc:HGNC:29590]
9049	AIP	aryl hydrocarbon receptor interacting protein [Source:HGNC Symbol;Acc:HGNC:358]
90678	LRSAM1	leucine rich repeat and sterile alpha motif containing 1 [Source:HGNC Symbol;Acc:HGNC:25135]
9128	PRPF4	pre-mRNA processing factor 4 [Source:HGNC Symbol;Acc:HGNC:17349]
9132	KCNQ4	potassium voltage-gated channel subfamily Q member 4 [Source:HGNC Symbol;Acc:HGNC:6298]
91369	ANKRD40	ankyrin repeat domain 40 [Source:HGNC Symbol;Acc:HGNC:28233]
9320	TRIP12	thyroid hormone receptor interactor 12 [Source:HGNC Symbol;Acc:HGNC:12306]
93487	MAPK1IP1L	mitogen-activated protein kinase 1 interacting protein 1 like [Source:HGNC Symbol;Acc:HGNC:19840]
94039	ZNF101	zinc finger protein 101 [Source:HGNC Symbol;Acc:HGNC:12881]
9410	SNRNP40	small nuclear ribonucleoprotein U5 subunit 40 [Source:HGNC Symbol;Acc:HGNC:30857]
94101	ORMDL1	ORMDL sphingolipid biosynthesis regulator 1 [Source:HGNC Symbol;Acc:HGNC:16036]
9611	NCOR1	nuclear receptor corepressor 1 [Source:HGNC Symbol;Acc:HGNC:7672]
9790	BMS1	BMS1 ribosome biogenesis factor [Source:HGNC Symbol;Acc:HGNC:23505]
9802	DAZAP2	DAZ associated protein 2 [Source:HGNC Symbol;Acc:HGNC:2684]
9824	ARHGAP11A	Rho GTPase activating protein 11A [Source:HGNC Symbol;Acc:HGNC:15783]
9920	KBTBD11	kelch repeat and BTB domain containing 11 [Source:HGNC Symbol;Acc:HGNC:29104]
9941	EXOG	exo/endonuclease G [Source:HGNC Symbol;Acc:HGNC:3347]
9984	THOC1	THO complex 1 [Source:HGNC Symbol;Acc:HGNC:19070]
9997	SCO2	SCO cytochrome c oxidase assembly protein 2 [Source:HGNC Symbol;Acc:HGNC:10604]

## Sheet: Chga-GFP;Rb∆∆;p53∆∆;p130∆+;Creb
Gene Set Name	# Genes in Gene Set (K)	Description	# Genes in Overlap (k)	k/K	p-value	FDR q-value
HALLMARK_OXIDATIVE_PHOSPHORYLATION	200	Genes encoding proteins involved in oxidative phosphorylation.	34	0.17	2.1e-22	1.05e-20
HALLMARK_HYPOXIA	200	Genes up-regulated in response to low oxygen levels (hypoxia).	28	0.14	2.1e-16	5.25e-15
HALLMARK_G2M_CHECKPOINT	200	Genes involved in the G2/M checkpoint, as in progression through the cell division cycle.	26	0.13	1.52e-14	1.9e-13
HALLMARK_MYC_TARGETS_V1	200	A subgroup of genes regulated by MYC - version 1 (v1).	26	0.13	1.52e-14	1.9e-13
HALLMARK_MTORC1_SIGNALING	200	Genes up-regulated through activation of mTORC1 complex.	24	0.12	9.19e-13	9.19e-12
HALLMARK_E2F_TARGETS	200	Genes encoding cell cycle related targets of E2F transcription factors.	23	0.115	6.66e-12	5.55e-11
HALLMARK_ADIPOGENESIS	200	Genes up-regulated during adipocyte differentiation (adipogenesis).	20	0.1	1.88e-09	1.34e-08
HALLMARK_FATTY_ACID_METABOLISM	158	Genes encoding proteins involved in metabolism of fatty acids.	17	0.1076	1.02e-08	6.17e-08
HALLMARK_GLYCOLYSIS	200	Genes encoding proteins involved in glycolysis and gluconeogenesis.	19	0.095	1.11e-08	6.17e-08
HALLMARK_XENOBIOTIC_METABOLISM	200	Genes encoding proteins involved in processing of drugs and other xenobiotics.	17	0.085	3.25e-07	1.62e-06
HALLMARK_UV_RESPONSE_UP	158	Genes up-regulated in response to ultraviolet (UV) radiation.	14	0.0886	2.15e-06	9.77e-06
HALLMARK_UNFOLDED_PROTEIN_RESPONSE	113	Genes up-regulated during unfolded protein response, a cellular stress response related to the endoplasmic reticulum.	11	0.0973	1.07e-05	4.46e-05
HALLMARK_MITOTIC_SPINDLE	199	Genes important for mitotic spindle assembly.	12	0.0603	0.000456	0.00149
HALLMARK_ESTROGEN_RESPONSE_EARLY	200	Genes defining early response to estrogen.	12	0.06	0.000476	0.00149
HALLMARK_ESTROGEN_RESPONSE_LATE	200	Genes defining late response to estrogen.	12	0.06	0.000476	0.00149
HALLMARK_HEME_METABOLISM	200	Genes involved in metabolism of heme (a cofactor consisting of iron and porphyrin) and erythroblast differentiation.	12	0.06	0.000476	0.00149
HALLMARK_DNA_REPAIR	150	Genes involved in DNA repair.	10	0.0667	0.000615	0.00181
HALLMARK_SPERMATOGENESIS	135	Genes up-regulated during production of male gametes (sperm), as in spermatogenesis.	9	0.0667	0.00114	0.00316
HALLMARK_ANDROGEN_RESPONSE	100	Genes defining response to androgens.	7	0.07	0.003	0.00789
HALLMARK_MYC_TARGETS_V2	58	A subgroup of genes regulated by MYC - version 2 (v2).	5	0.0862	0.00485	0.0121
HALLMARK_UV_RESPONSE_DN	144	Genes down-regulated in response to ultraviolet (UV) radiation.	8	0.0556	0.00638	0.0152
HALLMARK_CHOLESTEROL_HOMEOSTASIS	74	Genes involved in cholesterol homeostasis.	5	0.0676	0.0133	0.0291
HALLMARK_IL2_STAT5_SIGNALING	199	Genes up-regulated by STAT5 in response to IL2 stimulation.	9	0.0452	0.0142	0.0291
HALLMARK_INTERFERON_GAMMA_RESPONSE	200	Genes up-regulated in response to IFNG [GeneID=3458].	9	0.045	0.0146	0.0291
HALLMARK_KRAS_SIGNALING_UP	200	Genes up-regulated by KRAS activation.	9	0.045	0.0146	0.0291
HALLMARK_PI3K_AKT_MTOR_SIGNALING	105	Genes up-regulated by activation of the PI3K/AKT/mTOR pathway.	6	0.0571	0.0151	0.0291
HALLMARK_BILE_ACID_METABOLISM	112	Genes involve in metabolism of bile acids and salts.	6	0.0536	0.0201	0.0373
Gene/Gene Set Overlap Matrix
Entrez Gene Id	Gene Symbol	Gene Description	HALLMARK_OXIDATIVE_PHOSPHORYLATION	HALLMARK_HYPOXIA	HALLMARK_G2M_CHECKPOINT	HALLMARK_MYC_TARGETS_V1	HALLMARK_MTORC1_SIGNALING	HALLMARK_E2F_TARGETS	HALLMARK_ADIPOGENESIS	HALLMARK_FATTY_ACID_METABOLISM	HALLMARK_GLYCOLYSIS	HALLMARK_XENOBIOTIC_METABOLISM	HALLMARK_UV_RESPONSE_UP	HALLMARK_UNFOLDED_PROTEIN_RESPONSE	HALLMARK_MITOTIC_SPINDLE	HALLMARK_ESTROGEN_RESPONSE_EARLY	HALLMARK_ESTROGEN_RESPONSE_LATE	HALLMARK_HEME_METABOLISM	HALLMARK_DNA_REPAIR	HALLMARK_SPERMATOGENESIS	HALLMARK_ANDROGEN_RESPONSE	HALLMARK_MYC_TARGETS_V2	HALLMARK_UV_RESPONSE_DN	HALLMARK_CHOLESTEROL_HOMEOSTASIS	HALLMARK_IL2_STAT5_SIGNALING	HALLMARK_INTERFERON_GAMMA_RESPONSE	HALLMARK_KRAS_SIGNALING_UP	HALLMARK_PI3K_AKT_MTOR_SIGNALING	HALLMARK_BILE_ACID_METABOLISM
3939	LDHA	lactate dehydrogenase A [Source:HGNC Symbol;Acc:HGNC:6535]	HALLMARK_OXIDATIVE_PHOSPHORYLATION	HALLMARK_HYPOXIA		HALLMARK_MYC_TARGETS_V1	HALLMARK_MTORC1_SIGNALING			HALLMARK_FATTY_ACID_METABOLISM	HALLMARK_GLYCOLYSIS
2821	GPI	glucose-6-phosphate isomerase [Source:HGNC Symbol;Acc:HGNC:4458]	HALLMARK_OXIDATIVE_PHOSPHORYLATION	HALLMARK_HYPOXIA			HALLMARK_MTORC1_SIGNALING
5250	SLC25A3	solute carrier family 25 member 3 [Source:HGNC Symbol;Acc:HGNC:10989]	HALLMARK_OXIDATIVE_PHOSPHORYLATION			HALLMARK_MYC_TARGETS_V1
9377	COX5A	cytochrome c oxidase subunit 5A [Source:HGNC Symbol;Acc:HGNC:2267]	HALLMARK_OXIDATIVE_PHOSPHORYLATION			HALLMARK_MYC_TARGETS_V1
3313	HSPA9	heat shock protein family A (Hsp70) member 9 [Source:HGNC Symbol;Acc:HGNC:5244]	HALLMARK_OXIDATIVE_PHOSPHORYLATION				HALLMARK_MTORC1_SIGNALING							HALLMARK_UNFOLDED_PROTEIN_RESPONSE
50	ACO2	aconitase 2 [Source:HGNC Symbol;Acc:HGNC:118]	HALLMARK_OXIDATIVE_PHOSPHORYLATION						HALLMARK_ADIPOGENESIS	HALLMARK_FATTY_ACID_METABOLISM		HALLMARK_XENOBIOTIC_METABOLISM
3421	IDH3G	isocitrate dehydrogenase (NAD(+)) 3 non-catalytic subunit gamma [Source:HGNC Symbol;Acc:HGNC:5386]	HALLMARK_OXIDATIVE_PHOSPHORYLATION						HALLMARK_ADIPOGENESIS	HALLMARK_FATTY_ACID_METABOLISM
8802	SUCLG1	succinate-CoA ligase GDP/ADP-forming subunit alpha [Source:HGNC Symbol;Acc:HGNC:11449]	HALLMARK_OXIDATIVE_PHOSPHORYLATION						HALLMARK_ADIPOGENESIS	HALLMARK_FATTY_ACID_METABOLISM
5264	PHYH	phytanoyl-CoA 2-hydroxylase [Source:HGNC Symbol;Acc:HGNC:8940]	HALLMARK_OXIDATIVE_PHOSPHORYLATION						HALLMARK_ADIPOGENESIS																				HALLMARK_BILE_ACID_METABOLISM
1349	COX7B	cytochrome c oxidase subunit 7B [Source:HGNC Symbol;Acc:HGNC:2291]	HALLMARK_OXIDATIVE_PHOSPHORYLATION						HALLMARK_ADIPOGENESIS
1351	COX8A	cytochrome c oxidase subunit 8A [Source:HGNC Symbol;Acc:HGNC:2294]	HALLMARK_OXIDATIVE_PHOSPHORYLATION						HALLMARK_ADIPOGENESIS
1431	CS	citrate synthase [Source:HGNC Symbol;Acc:HGNC:2422]	HALLMARK_OXIDATIVE_PHOSPHORYLATION						HALLMARK_ADIPOGENESIS
27089	UQCRQ	ubiquinol-cytochrome c reductase complex III subunit VII [Source:HGNC Symbol;Acc:HGNC:29594]	HALLMARK_OXIDATIVE_PHOSPHORYLATION						HALLMARK_ADIPOGENESIS
29796	UQCR10	ubiquinol-cytochrome c reductase, complex III subunit X [Source:HGNC Symbol;Acc:HGNC:30863]	HALLMARK_OXIDATIVE_PHOSPHORYLATION						HALLMARK_ADIPOGENESIS
4698	NDUFA5	NADH:ubiquinone oxidoreductase subunit A5 [Source:HGNC Symbol;Acc:HGNC:7688]	HALLMARK_OXIDATIVE_PHOSPHORYLATION						HALLMARK_ADIPOGENESIS
3028	HSD17B10	hydroxysteroid 17-beta dehydrogenase 10 [Source:HGNC Symbol;Acc:HGNC:4800]	HALLMARK_OXIDATIVE_PHOSPHORYLATION							HALLMARK_FATTY_ACID_METABOLISM
8803	SUCLA2	succinate-CoA ligase ADP-forming subunit beta [Source:HGNC Symbol;Acc:HGNC:11448]	HALLMARK_OXIDATIVE_PHOSPHORYLATION							HALLMARK_FATTY_ACID_METABOLISM
1528	CYB5A	cytochrome b5 type A [Source:HGNC Symbol;Acc:HGNC:2570]	HALLMARK_OXIDATIVE_PHOSPHORYLATION								HALLMARK_GLYCOLYSIS	HALLMARK_XENOBIOTIC_METABOLISM
1345	COX6C	cytochrome c oxidase subunit 6C [Source:HGNC Symbol;Acc:HGNC:2285]	HALLMARK_OXIDATIVE_PHOSPHORYLATION														HALLMARK_ESTROGEN_RESPONSE_LATE
10440	TIMM17A	translocase of inner mitochondrial membrane 17A [Source:HGNC Symbol;Acc:HGNC:17315]	HALLMARK_OXIDATIVE_PHOSPHORYLATION
1329	COX5B	cytochrome c oxidase subunit 5B [Source:HGNC Symbol;Acc:HGNC:2269]	HALLMARK_OXIDATIVE_PHOSPHORYLATION
1347	COX7A2	cytochrome c oxidase subunit 7A2 [Source:HGNC Symbol;Acc:HGNC:2288]	HALLMARK_OXIDATIVE_PHOSPHORYLATION
1353	COX11	cytochrome c oxidase copper chaperone COX11 [Source:HGNC Symbol;Acc:HGNC:2261]	HALLMARK_OXIDATIVE_PHOSPHORYLATION
4695	NDUFA2	NADH:ubiquinone oxidoreductase subunit A2 [Source:HGNC Symbol;Acc:HGNC:7685]	HALLMARK_OXIDATIVE_PHOSPHORYLATION
4709	NDUFB3	NADH:ubiquinone oxidoreductase subunit B3 [Source:HGNC Symbol;Acc:HGNC:7698]	HALLMARK_OXIDATIVE_PHOSPHORYLATION
4729	NDUFV2	NADH:ubiquinone oxidoreductase core subunit V2 [Source:HGNC Symbol;Acc:HGNC:7717]	HALLMARK_OXIDATIVE_PHOSPHORYLATION
514	ATP5F1E	ATP synthase F1 subunit epsilon [Source:HGNC Symbol;Acc:HGNC:838]	HALLMARK_OXIDATIVE_PHOSPHORYLATION
51660	MPC1	mitochondrial pyruvate carrier 1 [Source:HGNC Symbol;Acc:HGNC:21606]	HALLMARK_OXIDATIVE_PHOSPHORYLATION
522	ATP5PF	ATP synthase peripheral stalk subunit F6 [Source:HGNC Symbol;Acc:HGNC:847]	HALLMARK_OXIDATIVE_PHOSPHORYLATION
529	ATP6V1E1	ATPase H+ transporting V1 subunit E1 [Source:HGNC Symbol;Acc:HGNC:857]	HALLMARK_OXIDATIVE_PHOSPHORYLATION
54205	CYCS	cytochrome c, somatic [Source:HGNC Symbol;Acc:HGNC:19986]	HALLMARK_OXIDATIVE_PHOSPHORYLATION
7381	UQCRB	ubiquinol-cytochrome c reductase binding protein [Source:HGNC Symbol;Acc:HGNC:12582]	HALLMARK_OXIDATIVE_PHOSPHORYLATION
7388	UQCRH	ubiquinol-cytochrome c reductase hinge protein [Source:HGNC Symbol;Acc:HGNC:12590]	HALLMARK_OXIDATIVE_PHOSPHORYLATION
9551	ATP5MF	ATP synthase membrane subunit f [Source:HGNC Symbol;Acc:HGNC:848]	HALLMARK_OXIDATIVE_PHOSPHORYLATION
226	ALDOA	aldolase, fructose-bisphosphate A [Source:HGNC Symbol;Acc:HGNC:414]		HALLMARK_HYPOXIA			HALLMARK_MTORC1_SIGNALING		HALLMARK_ADIPOGENESIS	HALLMARK_FATTY_ACID_METABOLISM	HALLMARK_GLYCOLYSIS		HALLMARK_UV_RESPONSE_UP
5211	PFKL	phosphofructokinase, liver type [Source:HGNC Symbol;Acc:HGNC:8876]		HALLMARK_HYPOXIA			HALLMARK_MTORC1_SIGNALING		HALLMARK_ADIPOGENESIS
2023	ENO1	enolase 1 [Source:HGNC Symbol;Acc:HGNC:3350]		HALLMARK_HYPOXIA			HALLMARK_MTORC1_SIGNALING				HALLMARK_GLYCOLYSIS
205	AK4	adenylate kinase 4 [Source:HGNC Symbol;Acc:HGNC:363]		HALLMARK_HYPOXIA			HALLMARK_MTORC1_SIGNALING				HALLMARK_GLYCOLYSIS
2542	SLC37A4	solute carrier family 37 member 4 [Source:HGNC Symbol;Acc:HGNC:4061]		HALLMARK_HYPOXIA			HALLMARK_MTORC1_SIGNALING				HALLMARK_GLYCOLYSIS
7167	TPI1	triosephosphate isomerase 1 [Source:HGNC Symbol;Acc:HGNC:12009]		HALLMARK_HYPOXIA			HALLMARK_MTORC1_SIGNALING				HALLMARK_GLYCOLYSIS
6513	SLC2A1	solute carrier family 2 member 1 [Source:HGNC Symbol;Acc:HGNC:11005]		HALLMARK_HYPOXIA			HALLMARK_MTORC1_SIGNALING									HALLMARK_ESTROGEN_RESPONSE_EARLY		HALLMARK_HEME_METABOLISM										HALLMARK_PI3K_AKT_MTOR_SIGNALING
2597	GAPDH	glyceraldehyde-3-phosphate dehydrogenase [Source:HGNC Symbol;Acc:HGNC:4141]		HALLMARK_HYPOXIA			HALLMARK_MTORC1_SIGNALING
4282	MIF	macrophage migration inhibitory factor [Source:HGNC Symbol;Acc:HGNC:7097]		HALLMARK_HYPOXIA						HALLMARK_FATTY_ACID_METABOLISM	HALLMARK_GLYCOLYSIS
5165	PDK3	pyruvate dehydrogenase kinase 3 [Source:HGNC Symbol;Acc:HGNC:8811]		HALLMARK_HYPOXIA							HALLMARK_GLYCOLYSIS													HALLMARK_CHOLESTEROL_HOMEOSTASIS
26355	FAM162A	family with sequence similarity 162 member A [Source:HGNC Symbol;Acc:HGNC:17865]		HALLMARK_HYPOXIA							HALLMARK_GLYCOLYSIS
2997	GYS1	glycogen synthase 1 [Source:HGNC Symbol;Acc:HGNC:4706]		HALLMARK_HYPOXIA							HALLMARK_GLYCOLYSIS
55276	PGM2	phosphoglucomutase 2 [Source:HGNC Symbol;Acc:HGNC:8906]		HALLMARK_HYPOXIA							HALLMARK_GLYCOLYSIS
6478	SIAH2	siah E3 ubiquitin protein ligase 2 [Source:HGNC Symbol;Acc:HGNC:10858]		HALLMARK_HYPOXIA												HALLMARK_ESTROGEN_RESPONSE_EARLY	HALLMARK_ESTROGEN_RESPONSE_LATE
8991	SELENBP1	selenium binding protein 1 [Source:HGNC Symbol;Acc:HGNC:10719]		HALLMARK_HYPOXIA														HALLMARK_HEME_METABOLISM
10397	NDRG1	N-myc downstream regulated 1 [Source:HGNC Symbol;Acc:HGNC:7679]		HALLMARK_HYPOXIA																	HALLMARK_ANDROGEN_RESPONSE				HALLMARK_IL2_STAT5_SIGNALING
7163	TPD52	tumor protein D52 [Source:HGNC Symbol;Acc:HGNC:12005]		HALLMARK_HYPOXIA																	HALLMARK_ANDROGEN_RESPONSE
302	ANXA2	annexin A2 [Source:HGNC Symbol;Acc:HGNC:537]		HALLMARK_HYPOXIA																			HALLMARK_UV_RESPONSE_DN
230	ALDOC	aldolase, fructose-bisphosphate C [Source:HGNC Symbol;Acc:HGNC:418]		HALLMARK_HYPOXIA																				HALLMARK_CHOLESTEROL_HOMEOSTASIS
7128	TNFAIP3	TNF alpha induced protein 3 [Source:HGNC Symbol;Acc:HGNC:11896]		HALLMARK_HYPOXIA																						HALLMARK_INTERFERON_GAMMA_RESPONSE	HALLMARK_KRAS_SIGNALING_UP
1942	EFNA1	ephrin A1 [Source:HGNC Symbol;Acc:HGNC:3221]		HALLMARK_HYPOXIA
10994	ILVBL	ilvB acetolactate synthase like [Source:HGNC Symbol;Acc:HGNC:6041]		HALLMARK_HYPOXIA
1466	CSRP2	cysteine and glycine rich protein 2 [Source:HGNC Symbol;Acc:HGNC:2470]		HALLMARK_HYPOXIA
25819	NOCT	nocturnin [Source:HGNC Symbol;Acc:HGNC:14254]		HALLMARK_HYPOXIA
3073	HEXA	hexosaminidase subunit alpha [Source:HGNC Symbol;Acc:HGNC:4878]		HALLMARK_HYPOXIA
55818	KDM3A	lysine demethylase 3A [Source:HGNC Symbol;Acc:HGNC:20815]		HALLMARK_HYPOXIA
991	CDC20	cell division cycle 20 [Source:HGNC Symbol;Acc:HGNC:1723]			HALLMARK_G2M_CHECKPOINT	HALLMARK_MYC_TARGETS_V1		HALLMARK_E2F_TARGETS									HALLMARK_ESTROGEN_RESPONSE_LATE
3838	KPNA2	karyopherin subunit alpha 2 [Source:HGNC Symbol;Acc:HGNC:6395]			HALLMARK_G2M_CHECKPOINT	HALLMARK_MYC_TARGETS_V1		HALLMARK_E2F_TARGETS
4953	ODC1	ornithine decarboxylase 1 [Source:HGNC Symbol;Acc:HGNC:8109]			HALLMARK_G2M_CHECKPOINT	HALLMARK_MYC_TARGETS_V1				HALLMARK_FATTY_ACID_METABOLISM															HALLMARK_IL2_STAT5_SIGNALING
8318	CDC45	cell division cycle 45 [Source:HGNC Symbol;Acc:HGNC:1739]			HALLMARK_G2M_CHECKPOINT	HALLMARK_MYC_TARGETS_V1
9184	BUB3	BUB3 mitotic checkpoint protein [Source:HGNC Symbol;Acc:HGNC:1151]			HALLMARK_G2M_CHECKPOINT	HALLMARK_MYC_TARGETS_V1
6790	AURKA	aurora kinase A [Source:HGNC Symbol;Acc:HGNC:11393]			HALLMARK_G2M_CHECKPOINT		HALLMARK_MTORC1_SIGNALING	HALLMARK_E2F_TARGETS			HALLMARK_GLYCOLYSIS				HALLMARK_MITOTIC_SPINDLE					HALLMARK_SPERMATOGENESIS
10212	DDX39A	DExD-box helicase 39A [Source:HGNC Symbol;Acc:HGNC:17821]			HALLMARK_G2M_CHECKPOINT		HALLMARK_MTORC1_SIGNALING	HALLMARK_E2F_TARGETS
6713	SQLE	squalene epoxidase [Source:HGNC Symbol;Acc:HGNC:11279]			HALLMARK_G2M_CHECKPOINT		HALLMARK_MTORC1_SIGNALING																	HALLMARK_CHOLESTEROL_HOMEOSTASIS
3161	HMMR	hyaluronan mediated motility receptor [Source:HGNC Symbol;Acc:HGNC:5012]			HALLMARK_G2M_CHECKPOINT			HALLMARK_E2F_TARGETS			HALLMARK_GLYCOLYSIS
1163	CKS1B	CDC28 protein kinase regulatory subunit 1B [Source:HGNC Symbol;Acc:HGNC:19083]			HALLMARK_G2M_CHECKPOINT			HALLMARK_E2F_TARGETS						HALLMARK_UNFOLDED_PROTEIN_RESPONSE
10051	SMC4	structural maintenance of chromosomes 4 [Source:HGNC Symbol;Acc:HGNC:14013]			HALLMARK_G2M_CHECKPOINT			HALLMARK_E2F_TARGETS							HALLMARK_MITOTIC_SPINDLE
29127	RACGAP1	Rac GTPase activating protein 1 [Source:HGNC Symbol;Acc:HGNC:9804]			HALLMARK_G2M_CHECKPOINT			HALLMARK_E2F_TARGETS							HALLMARK_MITOTIC_SPINDLE
23649	POLA2	DNA polymerase alpha 2, accessory subunit [Source:HGNC Symbol;Acc:HGNC:30073]			HALLMARK_G2M_CHECKPOINT			HALLMARK_E2F_TARGETS											HALLMARK_DNA_REPAIR
10664	CTCF	CCCTC-binding factor [Source:HGNC Symbol;Acc:HGNC:13723]			HALLMARK_G2M_CHECKPOINT			HALLMARK_E2F_TARGETS
23594	ORC6	origin recognition complex subunit 6 [Source:HGNC Symbol;Acc:HGNC:17151]			HALLMARK_G2M_CHECKPOINT			HALLMARK_E2F_TARGETS
27338	UBE2S	ubiquitin conjugating enzyme E2 S [Source:HGNC Symbol;Acc:HGNC:17895]			HALLMARK_G2M_CHECKPOINT			HALLMARK_E2F_TARGETS
4088	SMAD3	SMAD family member 3 [Source:HGNC Symbol;Acc:HGNC:6769]			HALLMARK_G2M_CHECKPOINT																		HALLMARK_UV_RESPONSE_DN
11044	TENT4A	terminal nucleotidyltransferase 4A [Source:HGNC Symbol;Acc:HGNC:16705]			HALLMARK_G2M_CHECKPOINT																		HALLMARK_UV_RESPONSE_DN
51776	MAP3K20	mitogen-activated protein kinase kinase kinase 20 [Source:HGNC Symbol;Acc:HGNC:17797]			HALLMARK_G2M_CHECKPOINT
10036	CHAF1A	chromatin assembly factor 1 subunit A [Source:HGNC Symbol;Acc:HGNC:1910]			HALLMARK_G2M_CHECKPOINT
10951	CBX1	chromobox 1 [Source:HGNC Symbol;Acc:HGNC:1551]			HALLMARK_G2M_CHECKPOINT
3980	LIG3	DNA ligase 3 [Source:HGNC Symbol;Acc:HGNC:6600]			HALLMARK_G2M_CHECKPOINT
4331	MNAT1	MNAT1 component of CDK activating kinase [Source:HGNC Symbol;Acc:HGNC:7181]			HALLMARK_G2M_CHECKPOINT
55872	PBK	PDZ binding kinase [Source:HGNC Symbol;Acc:HGNC:18282]			HALLMARK_G2M_CHECKPOINT
6421	SFPQ	splicing factor proline and glutamine rich [Source:HGNC Symbol;Acc:HGNC:10774]			HALLMARK_G2M_CHECKPOINT
94239	H2AZ2	H2A.Z variant histone 2 [Source:HGNC Symbol;Acc:HGNC:20664]			HALLMARK_G2M_CHECKPOINT
3251	HPRT1	hypoxanthine phosphoribosyltransferase 1 [Source:HGNC Symbol;Acc:HGNC:5157]				HALLMARK_MYC_TARGETS_V1	HALLMARK_MTORC1_SIGNALING					HALLMARK_XENOBIOTIC_METABOLISM					HALLMARK_ESTROGEN_RESPONSE_LATE		HALLMARK_DNA_REPAIR
2058	EPRS1	glutamyl-prolyl-tRNA synthetase 1 [Source:HGNC Symbol;Acc:HGNC:3418]				HALLMARK_MYC_TARGETS_V1	HALLMARK_MTORC1_SIGNALING
2547	XRCC6	X-ray repair cross complementing 6 [Source:HGNC Symbol;Acc:HGNC:4055]				HALLMARK_MYC_TARGETS_V1		HALLMARK_E2F_TARGETS													HALLMARK_ANDROGEN_RESPONSE
10549	PRDX4	peroxiredoxin 4 [Source:HGNC Symbol;Acc:HGNC:17169]				HALLMARK_MYC_TARGETS_V1		HALLMARK_E2F_TARGETS
4869	NPM1	nucleophosmin 1 [Source:HGNC Symbol;Acc:HGNC:7910]				HALLMARK_MYC_TARGETS_V1								HALLMARK_UNFOLDED_PROTEIN_RESPONSE								HALLMARK_MYC_TARGETS_V2
22916	NCBP2	nuclear cap binding protein subunit 2 [Source:HGNC Symbol;Acc:HGNC:7659]				HALLMARK_MYC_TARGETS_V1													HALLMARK_DNA_REPAIR
5245	PHB	prohibitin [Source:HGNC Symbol;Acc:HGNC:8912]				HALLMARK_MYC_TARGETS_V1																HALLMARK_MYC_TARGETS_V2
5683	PSMA2	proteasome 20S subunit alpha 2 [Source:HGNC Symbol;Acc:HGNC:9531]				HALLMARK_MYC_TARGETS_V1																				HALLMARK_INTERFERON_GAMMA_RESPONSE
5690	PSMB2	proteasome 20S subunit beta 2 [Source:HGNC Symbol;Acc:HGNC:9539]				HALLMARK_MYC_TARGETS_V1																				HALLMARK_INTERFERON_GAMMA_RESPONSE
3066	HDAC2	histone deacetylase 2 [Source:HGNC Symbol;Acc:HGNC:4853]				HALLMARK_MYC_TARGETS_V1
10054	UBA2	ubiquitin like modifier activating enzyme 2 [Source:HGNC Symbol;Acc:HGNC:30661]				HALLMARK_MYC_TARGETS_V1
2091	FBL	fibrillarin [Source:HGNC Symbol;Acc:HGNC:3599]				HALLMARK_MYC_TARGETS_V1
26121	PRPF31	pre-mRNA processing factor 31 [Source:HGNC Symbol;Acc:HGNC:15446]				HALLMARK_MYC_TARGETS_V1
28973	MRPS18B	mitochondrial ribosomal protein S18B [Source:HGNC Symbol;Acc:HGNC:14516]				HALLMARK_MYC_TARGETS_V1
51020	HDDC2	HD domain containing 2 [Source:HGNC Symbol;Acc:HGNC:21078]				HALLMARK_MYC_TARGETS_V1
51690	LSM7.00	LSM7 homolog, U6 small nuclear RNA and mRNA degradation associated [Source:HGNC Symbol;Acc:HGNC:20470]				HALLMARK_MYC_TARGETS_V1
6164	RPL34	ribosomal protein L34 [Source:HGNC Symbol;Acc:HGNC:10340]				HALLMARK_MYC_TARGETS_V1
6634	SNRPD3	small nuclear ribonucleoprotein D3 polypeptide [Source:HGNC Symbol;Acc:HGNC:11160]				HALLMARK_MYC_TARGETS_V1
7374	UNG	uracil DNA glycosylase [Source:HGNC Symbol;Acc:HGNC:12572]					HALLMARK_MTORC1_SIGNALING	HALLMARK_E2F_TARGETS														HALLMARK_MYC_TARGETS_V2
7277	TUBA4A	tubulin alpha 4a [Source:HGNC Symbol;Acc:HGNC:12407]					HALLMARK_MTORC1_SIGNALING						HALLMARK_UV_RESPONSE_UP		HALLMARK_MITOTIC_SPINDLE
10963	STIP1	stress induced phosphoprotein 1 [Source:HGNC Symbol;Acc:HGNC:11387]					HALLMARK_MTORC1_SIGNALING						HALLMARK_UV_RESPONSE_UP
3145	HMBS	hydroxymethylbilane synthase [Source:HGNC Symbol;Acc:HGNC:4982]					HALLMARK_MTORC1_SIGNALING											HALLMARK_HEME_METABOLISM
8833	GMPS	guanine monophosphate synthase [Source:HGNC Symbol;Acc:HGNC:4378]					HALLMARK_MTORC1_SIGNALING											HALLMARK_HEME_METABOLISM
7323	UBE2D3	ubiquitin conjugating enzyme E2 D3 [Source:HGNC Symbol;Acc:HGNC:12476]					HALLMARK_MTORC1_SIGNALING																					HALLMARK_PI3K_AKT_MTOR_SIGNALING
3308	HSPA4	heat shock protein family A (Hsp70) member 4 [Source:HGNC Symbol;Acc:HGNC:5237]					HALLMARK_MTORC1_SIGNALING
51377	UCHL5	ubiquitin C-terminal hydrolase L5 [Source:HGNC Symbol;Acc:HGNC:19678]					HALLMARK_MTORC1_SIGNALING
5631	PRPS1	phosphoribosyl pyrophosphate synthetase 1 [Source:HGNC Symbol;Acc:HGNC:9462]						HALLMARK_E2F_TARGETS			HALLMARK_GLYCOLYSIS
898	CCNE1	cyclin E1 [Source:HGNC Symbol;Acc:HGNC:1589]						HALLMARK_E2F_TARGETS					HALLMARK_UV_RESPONSE_UP												HALLMARK_IL2_STAT5_SIGNALING
5981	RFC1	replication factor C subunit 1 [Source:HGNC Symbol;Acc:HGNC:9969]						HALLMARK_E2F_TARGETS							HALLMARK_MITOTIC_SPINDLE
5982	RFC2	replication factor C subunit 2 [Source:HGNC Symbol;Acc:HGNC:9970]						HALLMARK_E2F_TARGETS											HALLMARK_DNA_REPAIR
1434	CSE1L	chromosome segregation 1 like [Source:HGNC Symbol;Acc:HGNC:2431]						HALLMARK_E2F_TARGETS
5591	PRKDC	protein kinase, DNA-activated, catalytic subunit [Source:HGNC Symbol;Acc:HGNC:9413]						HALLMARK_E2F_TARGETS
84296	GINS4	GINS complex subunit 4 [Source:HGNC Symbol;Acc:HGNC:28226]						HALLMARK_E2F_TARGETS
9918	NCAPD2	non-SMC condensin I complex subunit D2 [Source:HGNC Symbol;Acc:HGNC:24305]						HALLMARK_E2F_TARGETS
2184	FAH	fumarylacetoacetate hydrolase [Source:HGNC Symbol;Acc:HGNC:3579]							HALLMARK_ADIPOGENESIS			HALLMARK_XENOBIOTIC_METABOLISM													HALLMARK_IL2_STAT5_SIGNALING
8694	DGAT1	diacylglycerol O-acyltransferase 1 [Source:HGNC Symbol;Acc:HGNC:2843]							HALLMARK_ADIPOGENESIS				HALLMARK_UV_RESPONSE_UP
11194	ABCB8	ATP binding cassette subfamily B member 8 [Source:HGNC Symbol;Acc:HGNC:49]							HALLMARK_ADIPOGENESIS
23788	MTCH2	mitochondrial carrier 2 [Source:HGNC Symbol;Acc:HGNC:17587]							HALLMARK_ADIPOGENESIS
29103	DNAJC15	DnaJ heat shock protein family (Hsp40) member C15 [Source:HGNC Symbol;Acc:HGNC:20325]							HALLMARK_ADIPOGENESIS
56922	MCCC1	methylcrotonoyl-CoA carboxylase 1 [Source:HGNC Symbol;Acc:HGNC:6936]							HALLMARK_ADIPOGENESIS
58472	SQOR	sulfide quinone oxidoreductase [Source:HGNC Symbol;Acc:HGNC:20390]							HALLMARK_ADIPOGENESIS
7316	UBC	ubiquitin C [Source:HGNC Symbol;Acc:HGNC:12468]							HALLMARK_ADIPOGENESIS
4128	MAOA	monoamine oxidase A [Source:HGNC Symbol;Acc:HGNC:6833]								HALLMARK_FATTY_ACID_METABOLISM		HALLMARK_XENOBIOTIC_METABOLISM	HALLMARK_UV_RESPONSE_UP
7389	UROD	uroporphyrinogen decarboxylase [Source:HGNC Symbol;Acc:HGNC:12591]								HALLMARK_FATTY_ACID_METABOLISM			HALLMARK_UV_RESPONSE_UP					HALLMARK_HEME_METABOLISM
5720	PSME1	proteasome activator subunit 1 [Source:HGNC Symbol;Acc:HGNC:9568]								HALLMARK_FATTY_ACID_METABOLISM																HALLMARK_INTERFERON_GAMMA_RESPONSE
216	ALDH1A1	aldehyde dehydrogenase 1 family member A1 [Source:HGNC Symbol;Acc:HGNC:402]								HALLMARK_FATTY_ACID_METABOLISM																			HALLMARK_BILE_ACID_METABOLISM
7533	YWHAH	tyrosine 3-monooxygenase/tryptophan 5-monooxygenase activation protein eta [Source:HGNC Symbol;Acc:HGNC:12853]								HALLMARK_FATTY_ACID_METABOLISM
10808	HSPH1	heat shock protein family H (Hsp110) member 1 [Source:HGNC Symbol;Acc:HGNC:16969]								HALLMARK_FATTY_ACID_METABOLISM
3320	HSP90AA1	heat shock protein 90 alpha family class A member 1 [Source:HGNC Symbol;Acc:HGNC:5253]								HALLMARK_FATTY_ACID_METABOLISM
57515	SERINC1	serine incorporator 1 [Source:HGNC Symbol;Acc:HGNC:13464]								HALLMARK_FATTY_ACID_METABOLISM
5917	RARS1	arginyl-tRNA synthetase 1 [Source:HGNC Symbol;Acc:HGNC:9870]									HALLMARK_GLYCOLYSIS
5315	PKM	pyruvate kinase M1/2 [Source:HGNC Symbol;Acc:HGNC:9021]									HALLMARK_GLYCOLYSIS
79644	SRD5A3	steroid 5 alpha-reductase 3 [Source:HGNC Symbol;Acc:HGNC:25812]									HALLMARK_GLYCOLYSIS
8702	B4GALT4	beta-1,4-galactosyltransferase 4 [Source:HGNC Symbol;Acc:HGNC:927]									HALLMARK_GLYCOLYSIS
2643	GCH1	GTP cyclohydrolase 1 [Source:HGNC Symbol;Acc:HGNC:4193]										HALLMARK_XENOBIOTIC_METABOLISM	HALLMARK_UV_RESPONSE_UP													HALLMARK_INTERFERON_GAMMA_RESPONSE
9663	LPIN2	lipin 2 [Source:HGNC Symbol;Acc:HGNC:14450]										HALLMARK_XENOBIOTIC_METABOLISM						HALLMARK_HEME_METABOLISM
191	AHCY	adenosylhomocysteinase [Source:HGNC Symbol;Acc:HGNC:343]										HALLMARK_XENOBIOTIC_METABOLISM													HALLMARK_IL2_STAT5_SIGNALING
7378	UPP1	uridine phosphorylase 1 [Source:HGNC Symbol;Acc:HGNC:12576]										HALLMARK_XENOBIOTIC_METABOLISM														HALLMARK_INTERFERON_GAMMA_RESPONSE
1573	CYP2J2	cytochrome P450 family 2 subfamily J member 2 [Source:HGNC Symbol;Acc:HGNC:2634]										HALLMARK_XENOBIOTIC_METABOLISM
1644	DDC	dopa decarboxylase [Source:HGNC Symbol;Acc:HGNC:2719]										HALLMARK_XENOBIOTIC_METABOLISM
22949	PTGR1	prostaglandin reductase 1 [Source:HGNC Symbol;Acc:HGNC:18429]										HALLMARK_XENOBIOTIC_METABOLISM
26998	FETUB	fetuin B [Source:HGNC Symbol;Acc:HGNC:3658]										HALLMARK_XENOBIOTIC_METABOLISM
384	ARG2	arginase 2 [Source:HGNC Symbol;Acc:HGNC:664]										HALLMARK_XENOBIOTIC_METABOLISM
57447	NDRG2	NDRG family member 2 [Source:HGNC Symbol;Acc:HGNC:14460]										HALLMARK_XENOBIOTIC_METABOLISM
5831	PYCR1	pyrroline-5-carboxylate reductase 1 [Source:HGNC Symbol;Acc:HGNC:9721]										HALLMARK_XENOBIOTIC_METABOLISM
9361	LONP1	lon peptidase 1, mitochondrial [Source:HGNC Symbol;Acc:HGNC:9479]										HALLMARK_XENOBIOTIC_METABOLISM
10950	BTG3	BTG anti-proliferation factor 3 [Source:HGNC Symbol;Acc:HGNC:1132]											HALLMARK_UV_RESPONSE_UP				HALLMARK_ESTROGEN_RESPONSE_LATE
682	BSG	basigin (Ok blood group) [Source:HGNC Symbol;Acc:HGNC:1116]											HALLMARK_UV_RESPONSE_UP					HALLMARK_HEME_METABOLISM
3485	IGFBP2	insulin like growth factor binding protein 2 [Source:HGNC Symbol;Acc:HGNC:5471]											HALLMARK_UV_RESPONSE_UP
3301	DNAJA1	DnaJ heat shock protein family (Hsp40) member A1 [Source:HGNC Symbol;Acc:HGNC:5229]											HALLMARK_UV_RESPONSE_UP
5702	PSMC3	proteasome 26S subunit, ATPase 3 [Source:HGNC Symbol;Acc:HGNC:9549]											HALLMARK_UV_RESPONSE_UP
988	CDC5L	cell division cycle 5 like [Source:HGNC Symbol;Acc:HGNC:1743]											HALLMARK_UV_RESPONSE_UP
10897	YIF1A	Yip1 interacting factor homolog A, membrane trafficking protein [Source:HGNC Symbol;Acc:HGNC:16688]												HALLMARK_UNFOLDED_PROTEIN_RESPONSE
1639	DCTN1	dynactin subunit 1 [Source:HGNC Symbol;Acc:HGNC:2711]												HALLMARK_UNFOLDED_PROTEIN_RESPONSE
167227	DCP2	decapping mRNA 2 [Source:HGNC Symbol;Acc:HGNC:24452]												HALLMARK_UNFOLDED_PROTEIN_RESPONSE
1938	EEF2	eukaryotic translation elongation factor 2 [Source:HGNC Symbol;Acc:HGNC:3214]												HALLMARK_UNFOLDED_PROTEIN_RESPONSE
22926	ATF6	activating transcription factor 6 [Source:HGNC Symbol;Acc:HGNC:791]												HALLMARK_UNFOLDED_PROTEIN_RESPONSE
23517	MTREX	Mtr4 exosome RNA helicase [Source:HGNC Symbol;Acc:HGNC:18734]												HALLMARK_UNFOLDED_PROTEIN_RESPONSE
5393	EXOSC9	exosome component 9 [Source:HGNC Symbol;Acc:HGNC:9137]												HALLMARK_UNFOLDED_PROTEIN_RESPONSE
55466	DNAJA4	DnaJ heat shock protein family (Hsp40) member A4 [Source:HGNC Symbol;Acc:HGNC:14885]												HALLMARK_UNFOLDED_PROTEIN_RESPONSE
10844	TUBGCP2	tubulin gamma complex associated protein 2 [Source:HGNC Symbol;Acc:HGNC:18599]													HALLMARK_MITOTIC_SPINDLE
22930	RAB3GAP1	RAB3 GTPase activating protein catalytic subunit 1 [Source:HGNC Symbol;Acc:HGNC:17063]													HALLMARK_MITOTIC_SPINDLE
23012	STK38L	serine/threonine kinase 38 like [Source:HGNC Symbol;Acc:HGNC:17848]													HALLMARK_MITOTIC_SPINDLE
6904	TBCD	tubulin folding cofactor D [Source:HGNC Symbol;Acc:HGNC:11581]													HALLMARK_MITOTIC_SPINDLE
8874	ARHGEF7	Rho guanine nucleotide exchange factor 7 [Source:HGNC Symbol;Acc:HGNC:15607]													HALLMARK_MITOTIC_SPINDLE
9735	KNTC1	kinetochore associated 1 [Source:HGNC Symbol;Acc:HGNC:17255]													HALLMARK_MITOTIC_SPINDLE
9771	RAPGEF5	Rap guanine nucleotide exchange factor 5 [Source:HGNC Symbol;Acc:HGNC:16862]													HALLMARK_MITOTIC_SPINDLE
11057	ABHD2	abhydrolase domain containing 2, acylglycerol lipase [Source:HGNC Symbol;Acc:HGNC:18717]														HALLMARK_ESTROGEN_RESPONSE_EARLY	HALLMARK_ESTROGEN_RESPONSE_LATE				HALLMARK_ANDROGEN_RESPONSE
4137	MAPT	microtubule associated protein tau [Source:HGNC Symbol;Acc:HGNC:6893]														HALLMARK_ESTROGEN_RESPONSE_EARLY	HALLMARK_ESTROGEN_RESPONSE_LATE
6196	RPS6KA2	ribosomal protein S6 kinase A2 [Source:HGNC Symbol;Acc:HGNC:10431]														HALLMARK_ESTROGEN_RESPONSE_EARLY	HALLMARK_ESTROGEN_RESPONSE_LATE
9620	CELSR1	cadherin EGF LAG seven-pass G-type receptor 1 [Source:HGNC Symbol;Acc:HGNC:1850]														HALLMARK_ESTROGEN_RESPONSE_EARLY
65055	REEP1	receptor accessory protein 1 [Source:HGNC Symbol;Acc:HGNC:25786]														HALLMARK_ESTROGEN_RESPONSE_EARLY
107	ADCY1	adenylate cyclase 1 [Source:HGNC Symbol;Acc:HGNC:232]														HALLMARK_ESTROGEN_RESPONSE_EARLY
2674	GFRA1	GDNF family receptor alpha 1 [Source:HGNC Symbol;Acc:HGNC:4243]														HALLMARK_ESTROGEN_RESPONSE_EARLY
744	MPPED2	metallophosphoesterase domain containing 2 [Source:HGNC Symbol;Acc:HGNC:1180]														HALLMARK_ESTROGEN_RESPONSE_EARLY
7739	ZNF185	zinc finger protein 185 with LIM domain [Source:HGNC Symbol;Acc:HGNC:12976]														HALLMARK_ESTROGEN_RESPONSE_EARLY
9687	GREB1	growth regulating estrogen receptor binding 1 [Source:HGNC Symbol;Acc:HGNC:24885]														HALLMARK_ESTROGEN_RESPONSE_EARLY
2171	FABP5	fatty acid binding protein 5 [Source:HGNC Symbol;Acc:HGNC:3560]															HALLMARK_ESTROGEN_RESPONSE_LATE							HALLMARK_CHOLESTEROL_HOMEOSTASIS
5121	PCP4	Purkinje cell protein 4 [Source:HGNC Symbol;Acc:HGNC:8742]															HALLMARK_ESTROGEN_RESPONSE_LATE										HALLMARK_KRAS_SIGNALING_UP
429	ASCL1	achaete-scute family bHLH transcription factor 1 [Source:HGNC Symbol;Acc:HGNC:738]															HALLMARK_ESTROGEN_RESPONSE_LATE
9135	RABEP1	rabaptin, RAB GTPase binding effector protein 1 [Source:HGNC Symbol;Acc:HGNC:17677]															HALLMARK_ESTROGEN_RESPONSE_LATE
8031	NCOA4	nuclear receptor coactivator 4 [Source:HGNC Symbol;Acc:HGNC:7671]																HALLMARK_HEME_METABOLISM			HALLMARK_ANDROGEN_RESPONSE
119	ADD2	adducin 2 [Source:HGNC Symbol;Acc:HGNC:244]																HALLMARK_HEME_METABOLISM
26020	LRP10	LDL receptor related protein 10 [Source:HGNC Symbol;Acc:HGNC:14553]																HALLMARK_HEME_METABOLISM
26130	GAPVD1	GTPase activating protein and VPS9 domains 1 [Source:HGNC Symbol;Acc:HGNC:23375]																HALLMARK_HEME_METABOLISM
55532	SLC30A10	solute carrier family 30 member 10 [Source:HGNC Symbol;Acc:HGNC:25355]																HALLMARK_HEME_METABOLISM
27343	POLL	DNA polymerase lambda [Source:HGNC Symbol;Acc:HGNC:9184]																	HALLMARK_DNA_REPAIR
2958	GTF2A2	general transcription factor IIA subunit 2 [Source:HGNC Symbol;Acc:HGNC:4647]																	HALLMARK_DNA_REPAIR
5432	POLR2C	RNA polymerase II subunit C [Source:HGNC Symbol;Acc:HGNC:9189]																	HALLMARK_DNA_REPAIR
5433	POLR2D	RNA polymerase II subunit D [Source:HGNC Symbol;Acc:HGNC:9191]																	HALLMARK_DNA_REPAIR
6809	STX3	syntaxin 3 [Source:HGNC Symbol;Acc:HGNC:11438]																	HALLMARK_DNA_REPAIR
9013	TAF1C	TATA-box binding protein associated factor, RNA polymerase I subunit C [Source:HGNC Symbol;Acc:HGNC:11534]																	HALLMARK_DNA_REPAIR
6447	SCG5	secretogranin V [Source:HGNC Symbol;Acc:HGNC:10816]																		HALLMARK_SPERMATOGENESIS							HALLMARK_KRAS_SIGNALING_UP
5576	PRKAR2A	protein kinase cAMP-dependent type II regulatory subunit alpha [Source:HGNC Symbol;Acc:HGNC:9391]																		HALLMARK_SPERMATOGENESIS								HALLMARK_PI3K_AKT_MTOR_SIGNALING
2947	GSTM3	glutathione S-transferase mu 3 [Source:HGNC Symbol;Acc:HGNC:4635]																		HALLMARK_SPERMATOGENESIS
29118	DDX25	DEAD-box helicase 25 [Source:HGNC Symbol;Acc:HGNC:18698]																		HALLMARK_SPERMATOGENESIS
5414	SEPTIN4	septin 4 [Source:HGNC Symbol;Acc:HGNC:9165]																		HALLMARK_SPERMATOGENESIS
5884	RAD17	RAD17 checkpoint clamp loader component [Source:HGNC Symbol;Acc:HGNC:9807]																		HALLMARK_SPERMATOGENESIS
81570	CLPB	caseinolytic mitochondrial matrix peptidase chaperone subunit B [Source:HGNC Symbol;Acc:HGNC:30664]																		HALLMARK_SPERMATOGENESIS
84519	ACRBP	acrosin binding protein [Source:HGNC Symbol;Acc:HGNC:17195]																		HALLMARK_SPERMATOGENESIS
6197	RPS6KA3	ribosomal protein S6 kinase A3 [Source:HGNC Symbol;Acc:HGNC:10432]																			HALLMARK_ANDROGEN_RESPONSE							HALLMARK_PI3K_AKT_MTOR_SIGNALING
1622	DBI	diazepam binding inhibitor, acyl-CoA binding protein [Source:HGNC Symbol;Acc:HGNC:2690]																			HALLMARK_ANDROGEN_RESPONSE
2193	FARSA	phenylalanyl-tRNA synthetase subunit alpha [Source:HGNC Symbol;Acc:HGNC:3592]																				HALLMARK_MYC_TARGETS_V2
23481	PES1.00	pescadillo ribosomal biogenesis factor 1 [Source:HGNC Symbol;Acc:HGNC:8848]																				HALLMARK_MYC_TARGETS_V2
3382	ICA1	islet cell autoantigen 1 [Source:HGNC Symbol;Acc:HGNC:5343]																					HALLMARK_UV_RESPONSE_DN
490	ATP2B1	ATPase plasma membrane Ca2+ transporting 1 [Source:HGNC Symbol;Acc:HGNC:814]																					HALLMARK_UV_RESPONSE_DN
10659	CELF2	CUGBP Elav-like family member 2 [Source:HGNC Symbol;Acc:HGNC:2550]																					HALLMARK_UV_RESPONSE_DN
23576	DDAH1	dimethylarginine dimethylaminohydrolase 1 [Source:HGNC Symbol;Acc:HGNC:2715]																					HALLMARK_UV_RESPONSE_DN
273	AMPH	amphiphysin [Source:HGNC Symbol;Acc:HGNC:471]																					HALLMARK_UV_RESPONSE_DN
214	ALCAM	activated leukocyte cell adhesion molecule [Source:HGNC Symbol;Acc:HGNC:400]																						HALLMARK_CHOLESTEROL_HOMEOSTASIS	HALLMARK_IL2_STAT5_SIGNALING
1522	CTSZ	cathepsin Z [Source:HGNC Symbol;Acc:HGNC:2547]																							HALLMARK_IL2_STAT5_SIGNALING
51651	PTRH2	peptidyl-tRNA hydrolase 2 [Source:HGNC Symbol;Acc:HGNC:24265]																							HALLMARK_IL2_STAT5_SIGNALING
64332	NFKBIZ	NFKB inhibitor zeta [Source:HGNC Symbol;Acc:HGNC:29805]																							HALLMARK_IL2_STAT5_SIGNALING
3105	HLA-A	major histocompatibility complex, class I, A [Source:HGNC Symbol;Acc:HGNC:4931]																								HALLMARK_INTERFERON_GAMMA_RESPONSE
91543	RSAD2	radical S-adenosyl methionine domain containing 2 [Source:HGNC Symbol;Acc:HGNC:30908]																								HALLMARK_INTERFERON_GAMMA_RESPONSE
26053	AUTS2	activator of transcription and developmental regulator AUTS2 [Source:HGNC Symbol;Acc:HGNC:14262]																								HALLMARK_INTERFERON_GAMMA_RESPONSE
11184	MAP4K1	mitogen-activated protein kinase kinase kinase kinase 1 [Source:HGNC Symbol;Acc:HGNC:6863]																									HALLMARK_KRAS_SIGNALING_UP
10912	GADD45G	growth arrest and DNA damage inducible gamma [Source:HGNC Symbol;Acc:HGNC:4097]																									HALLMARK_KRAS_SIGNALING_UP
11179	ZNF277	zinc finger protein 277 [Source:HGNC Symbol;Acc:HGNC:13070]																									HALLMARK_KRAS_SIGNALING_UP
26499	PLEK2	pleckstrin 2 [Source:HGNC Symbol;Acc:HGNC:19238]																									HALLMARK_KRAS_SIGNALING_UP
54462	CCSER2	coiled-coil serine rich protein 2 [Source:HGNC Symbol;Acc:HGNC:29197]																									HALLMARK_KRAS_SIGNALING_UP
55365	TMEM176A	transmembrane protein 176A [Source:HGNC Symbol;Acc:HGNC:24930]																									HALLMARK_KRAS_SIGNALING_UP
51295	ECSIT	ECSIT signaling integrator [Source:HGNC Symbol;Acc:HGNC:29548]																										HALLMARK_PI3K_AKT_MTOR_SIGNALING
5571	PRKAG1	protein kinase AMP-activated non-catalytic subunit gamma 1 [Source:HGNC Symbol;Acc:HGNC:9385]																										HALLMARK_PI3K_AKT_MTOR_SIGNALING
5825	ABCD3	ATP binding cassette subfamily D member 3 [Source:HGNC Symbol;Acc:HGNC:67]																											HALLMARK_BILE_ACID_METABOLISM
8443	GNPAT	glyceronephosphate O-acyltransferase [Source:HGNC Symbol;Acc:HGNC:4416]																											HALLMARK_BILE_ACID_METABOLISM
5213	PFKM	phosphofructokinase, muscle [Source:HGNC Symbol;Acc:HGNC:8877]																											HALLMARK_BILE_ACID_METABOLISM
5947	RBP1	retinol binding protein 1 [Source:HGNC Symbol;Acc:HGNC:9919]																											HALLMARK_BILE_ACID_METABOLISM
7857	SCG2	secretogranin II [Source:HGNC Symbol;Acc:HGNC:10575]
4897	NRCAM	neuronal cell adhesion molecule [Source:HGNC Symbol;Acc:HGNC:7994]
5862	RAB2A	RAB2A, member RAS oncogene family [Source:HGNC Symbol;Acc:HGNC:9763]
6456	SH3GL2	SH3 domain containing GRB2 like 2, endophilin A1 [Source:HGNC Symbol;Acc:HGNC:10831]
390916	NUDT19	nudix hydrolase 19 [Source:HGNC Symbol;Acc:HGNC:32036]
23054	NCOA6	nuclear receptor coactivator 6 [Source:HGNC Symbol;Acc:HGNC:15936]
2319	FLOT2	flotillin 2 [Source:HGNC Symbol;Acc:HGNC:3758]
55829	SELENOS	selenoprotein S [Source:HGNC Symbol;Acc:HGNC:30396]
2512	FTL	ferritin light chain [Source:HGNC Symbol;Acc:HGNC:3999]
2533	FYB1	FYN binding protein 1 [Source:HGNC Symbol;Acc:HGNC:4036]
6170	RPL39	ribosomal protein L39 [Source:HGNC Symbol;Acc:HGNC:10350]
70	ACTC1	actin alpha cardiac muscle 1 [Source:HGNC Symbol;Acc:HGNC:143]
10109	ARPC2	actin related protein 2/3 complex subunit 2 [Source:HGNC Symbol;Acc:HGNC:705]
6237	RRAS	RAS related [Source:HGNC Symbol;Acc:HGNC:10447]
84552	PARD6G	par-6 family cell polarity regulator gamma [Source:HGNC Symbol;Acc:HGNC:16076]
25898	RCHY1	ring finger and CHY zinc finger domain containing 1 [Source:HGNC Symbol;Acc:HGNC:17479]
3275	PRMT2	protein arginine methyltransferase 2 [Source:HGNC Symbol;Acc:HGNC:5186]
51499	TRIAP1	TP53 regulated inhibitor of apoptosis 1 [Source:HGNC Symbol;Acc:HGNC:26937]
64782	AEN	apoptosis enhancing nuclease [Source:HGNC Symbol;Acc:HGNC:25722]
10318	TNIP1	TNFAIP3 interacting protein 1 [Source:HGNC Symbol;Acc:HGNC:16903]
3375	IAPP	islet amyloid polypeptide [Source:HGNC Symbol;Acc:HGNC:5329]
6726	SRP9	signal recognition particle 9 [Source:HGNC Symbol;Acc:HGNC:11304]
4938	OAS1	2'-5'-oligoadenylate synthetase 1 [Source:HGNC Symbol;Acc:HGNC:8086]
5479	PPIB	peptidylprolyl isomerase B [Source:HGNC Symbol;Acc:HGNC:9255]
55190	NUDT11	nudix hydrolase 11 [Source:HGNC Symbol;Acc:HGNC:18011]
6588	SLN	sarcolipin [Source:HGNC Symbol;Acc:HGNC:11089]
9986	RCE1	Ras converting CAAX endopeptidase 1 [Source:HGNC Symbol;Acc:HGNC:13721]
824	CAPN2	calpain 2 [Source:HGNC Symbol;Acc:HGNC:1479]
7297	TYK2	tyrosine kinase 2 [Source:HGNC Symbol;Acc:HGNC:12440]
4043	LRPAP1	LDL receptor related protein associated protein 1 [Source:HGNC Symbol;Acc:HGNC:6701]
10011	SRA1	steroid receptor RNA activator 1 [Source:HGNC Symbol;Acc:HGNC:11281]
10016	PDCD6	programmed cell death 6 [Source:HGNC Symbol;Acc:HGNC:8765]
100507246	SNHG16	small nucleolar RNA host gene 16 [Source:HGNC Symbol;Acc:HGNC:44352]
100528062	ARMCX5-GPRASP2	ARMCX5-GPRASP2 readthrough [Source:HGNC Symbol;Acc:HGNC:42000]
10066	SCAMP2	secretory carrier membrane protein 2 [Source:HGNC Symbol;Acc:HGNC:10564]
100885850	PTGES3L-AARSD1	PTGES3L-AARSD1 readthrough [Source:HGNC Symbol;Acc:HGNC:43946]
10101	NUBP2	nucleotide binding protein 2 [Source:HGNC Symbol;Acc:HGNC:8042]
10121	ACTR1A	actin related protein 1A [Source:HGNC Symbol;Acc:HGNC:167]
10150	MBNL2	muscleblind like splicing regulator 2 [Source:HGNC Symbol;Acc:HGNC:16746]
10159	ATP6AP2	ATPase H+ transporting accessory protein 2 [Source:HGNC Symbol;Acc:HGNC:18305]
10190	TXNDC9	thioredoxin domain containing 9 [Source:HGNC Symbol;Acc:HGNC:24110]
101928991	CCDC92B	coiled-coil domain containing 92B [Source:HGNC Symbol;Acc:HGNC:52279]
10204	NUTF2	nuclear transport factor 2 [Source:HGNC Symbol;Acc:HGNC:13722]
102157402	AK6	adenylate kinase 6 [Source:HGNC Symbol;Acc:HGNC:49151]
10317	B3GALT5	beta-1,3-galactosyltransferase 5 [Source:HGNC Symbol;Acc:HGNC:920]
10421	CD2BP2	CD2 cytoplasmic tail binding protein 2 [Source:HGNC Symbol;Acc:HGNC:1656]
10428	CFDP1	craniofacial development protein 1 [Source:HGNC Symbol;Acc:HGNC:1873]
10469	TIMM44	translocase of inner mitochondrial membrane 44 [Source:HGNC Symbol;Acc:HGNC:17316]
10491	CRTAP	cartilage associated protein [Source:HGNC Symbol;Acc:HGNC:2379]
10523	CHERP	calcium homeostasis endoplasmic reticulum protein [Source:HGNC Symbol;Acc:HGNC:16930]
10524	KAT5	lysine acetyltransferase 5 [Source:HGNC Symbol;Acc:HGNC:5275]
10594	PRPF8	pre-mRNA processing factor 8 [Source:HGNC Symbol;Acc:HGNC:17340]
1070	CETN3	centrin 3 [Source:HGNC Symbol;Acc:HGNC:1868]
10799	RPP40	ribonuclease P/MRP subunit p40 [Source:HGNC Symbol;Acc:HGNC:20992]
10807	ENTR1	endosome associated trafficking regulator 1 [Source:HGNC Symbol;Acc:HGNC:10667]
11075	STMN2	stathmin 2 [Source:HGNC Symbol;Acc:HGNC:10577]
11116	CEP43	centrosomal protein 43 [Source:HGNC Symbol;Acc:HGNC:17012]
11172	INSL6	insulin like 6 [Source:HGNC Symbol;Acc:HGNC:6089]
11177	BAZ1A	bromodomain adjacent to zinc finger domain 1A [Source:HGNC Symbol;Acc:HGNC:960]
11198	SUPT16H	SPT16 homolog, facilitates chromatin remodeling subunit [Source:HGNC Symbol;Acc:HGNC:11465]
11224	RPL35	ribosomal protein L35 [Source:HGNC Symbol;Acc:HGNC:10344]
11231	SEC63	SEC63 homolog, protein translocation regulator [Source:HGNC Symbol;Acc:HGNC:21082]
11236	RNF139	ring finger protein 139 [Source:HGNC Symbol;Acc:HGNC:17023]
112812	FDX2	ferredoxin 2 [Source:HGNC Symbol;Acc:HGNC:30546]
113189	CHST14	carbohydrate sulfotransferase 14 [Source:HGNC Symbol;Acc:HGNC:24464]
113612	CYP2U1	cytochrome P450 family 2 subfamily U member 1 [Source:HGNC Symbol;Acc:HGNC:20582]
113791	PIK3IP1	phosphoinositide-3-kinase interacting protein 1 [Source:HGNC Symbol;Acc:HGNC:24942]
114987	WDR31	WD repeat domain 31 [Source:HGNC Symbol;Acc:HGNC:21421]
116443	GRIN3A	glutamate ionotropic receptor NMDA type subunit 3A [Source:HGNC Symbol;Acc:HGNC:16767]
117143	TADA1	transcriptional adaptor 1 [Source:HGNC Symbol;Acc:HGNC:30631]
1184	CLCN5	chloride voltage-gated channel 5 [Source:HGNC Symbol;Acc:HGNC:2023]
118738	ZNF488	zinc finger protein 488 [Source:HGNC Symbol;Acc:HGNC:23535]
1195	CLK1	CDC like kinase 1 [Source:HGNC Symbol;Acc:HGNC:2068]
1198	CLK3	CDC like kinase 3 [Source:HGNC Symbol;Acc:HGNC:2071]
121260	SLC15A4	solute carrier family 15 member 4 [Source:HGNC Symbol;Acc:HGNC:23090]
121268	RHEBL1	RHEB like 1 [Source:HGNC Symbol;Acc:HGNC:21166]
121278	TPH2	tryptophan hydroxylase 2 [Source:HGNC Symbol;Acc:HGNC:20692]
121536	AEBP2	AE binding protein 2 [Source:HGNC Symbol;Acc:HGNC:24051]
122553	TRAPPC6B	trafficking protein particle complex 6B [Source:HGNC Symbol;Acc:HGNC:23066]
123688	HYKK	hydroxylysine kinase [Source:HGNC Symbol;Acc:HGNC:34403]
124512	METTL23	methyltransferase like 23 [Source:HGNC Symbol;Acc:HGNC:26988]
128977	C22orf39	chromosome 22 open reading frame 39 [Source:HGNC Symbol;Acc:HGNC:27012]
130872	AHSA2P	activator of HSP90 ATPase homolog 2, pseudogene [Source:HGNC Symbol;Acc:HGNC:20437]
132001	TAMM41	TAM41 mitochondrial translocator assembly and maintenance homolog [Source:HGNC Symbol;Acc:HGNC:25187]
134111	UBE2QL1	ubiquitin conjugating enzyme E2 Q family like 1 [Source:HGNC Symbol;Acc:HGNC:37269]
139322	APOOL	apolipoprotein O like [Source:HGNC Symbol;Acc:HGNC:24009]
139818	DOCK11	dedicator of cytokinesis 11 [Source:HGNC Symbol;Acc:HGNC:23483]
144717	PHETA1	PH domain containing endocytic trafficking adaptor 1 [Source:HGNC Symbol;Acc:HGNC:26509]
145282	MIPOL1	mirror-image polydactyly 1 [Source:HGNC Symbol;Acc:HGNC:21460]
145389	SLC38A6	solute carrier family 38 member 6 [Source:HGNC Symbol;Acc:HGNC:19863]
146713	RBFOX3	RNA binding fox-1 homolog 3 [Source:HGNC Symbol;Acc:HGNC:27097]
148022	TICAM1	toll like receptor adaptor molecule 1 [Source:HGNC Symbol;Acc:HGNC:18348]
148932	MOB3C	MOB kinase activator 3C [Source:HGNC Symbol;Acc:HGNC:29800]
149840	SHLD1	shieldin complex subunit 1 [Source:HGNC Symbol;Acc:HGNC:26318]
151246	SGO2	shugoshin 2 [Source:HGNC Symbol;Acc:HGNC:30812]
151963	MB21D2	Mab-21 domain containing 2 [Source:HGNC Symbol;Acc:HGNC:30438]
158471	PRUNE2	prune homolog 2 with BCH domain [Source:HGNC Symbol;Acc:HGNC:25209]
1620	BRINP1	BMP/retinoic acid inducible neural specific 1 [Source:HGNC Symbol;Acc:HGNC:2687]
1653	DDX1	DEAD-box helicase 1 [Source:HGNC Symbol;Acc:HGNC:2734]
166614	DCLK2	doublecortin like kinase 2 [Source:HGNC Symbol;Acc:HGNC:19002]
175	AGA	aspartylglucosaminidase [Source:HGNC Symbol;Acc:HGNC:318]
1804	DPP6	dipeptidyl peptidase like 6 [Source:HGNC Symbol;Acc:HGNC:3010]
196383	RILPL2	Rab interacting lysosomal protein like 2 [Source:HGNC Symbol;Acc:HGNC:28787]
1967	EIF2B1	eukaryotic translation initiation factor 2B subunit alpha [Source:HGNC Symbol;Acc:HGNC:3257]
197370	NSMCE1	NSE1 homolog, SMC5-SMC6 complex component [Source:HGNC Symbol;Acc:HGNC:29897]
1975	EIF4B	eukaryotic translation initiation factor 4B [Source:HGNC Symbol;Acc:HGNC:3285]
200312	RNF215	ring finger protein 215 [Source:HGNC Symbol;Acc:HGNC:33434]
2047	EPHB1	EPH receptor B1 [Source:HGNC Symbol;Acc:HGNC:3392]
2098	ESD	esterase D [Source:HGNC Symbol;Acc:HGNC:3465]
2197	FAU	FAU ubiquitin like and ribosomal protein S30 fusion [Source:HGNC Symbol;Acc:HGNC:3597]
221302	ZUP1	zinc finger containing ubiquitin peptidase 1 [Source:HGNC Symbol;Acc:HGNC:21224]
221710	SMIM13	small integral membrane protein 13 [Source:HGNC Symbol;Acc:HGNC:27356]
2245	FGD1	FYVE, RhoGEF and PH domain containing 1 [Source:HGNC Symbol;Acc:HGNC:3663]
22803	XRN2	5'-3' exoribonuclease 2 [Source:HGNC Symbol;Acc:HGNC:12836]
22898	DENND3	DENN domain containing 3 [Source:HGNC Symbol;Acc:HGNC:29134]
22902	RUFY3	RUN and FYVE domain containing 3 [Source:HGNC Symbol;Acc:HGNC:30285]
23020	SNRNP200	small nuclear ribonucleoprotein U5 subunit 200 [Source:HGNC Symbol;Acc:HGNC:30859]
23028	KDM1A	lysine demethylase 1A [Source:HGNC Symbol;Acc:HGNC:29079]
23043	TNIK	TRAF2 and NCK interacting kinase [Source:HGNC Symbol;Acc:HGNC:30765]
23059	CLUAP1	clusterin associated protein 1 [Source:HGNC Symbol;Acc:HGNC:19009]
23167	EFR3A	EFR3 homolog A [Source:HGNC Symbol;Acc:HGNC:28970]
23193	GANAB	glucosidase II alpha subunit [Source:HGNC Symbol;Acc:HGNC:4138]
23195	MDN1	midasin AAA ATPase 1 [Source:HGNC Symbol;Acc:HGNC:18302]
23264	ZC3H7B	zinc finger CCCH-type containing 7B [Source:HGNC Symbol;Acc:HGNC:30869]
23281	MTUS2	microtubule associated scaffold protein 2 [Source:HGNC Symbol;Acc:HGNC:20595]
23312	DMXL2	Dmx like 2 [Source:HGNC Symbol;Acc:HGNC:2938]
23339	VPS39	VPS39 subunit of HOPS complex [Source:HGNC Symbol;Acc:HGNC:20593]
23380	SRGAP2	SLIT-ROBO Rho GTPase activating protein 2 [Source:HGNC Symbol;Acc:HGNC:19751]
23399	CTDNEP1	CTD nuclear envelope phosphatase 1 [Source:HGNC Symbol;Acc:HGNC:19085]
23426	GRIP1	glutamate receptor interacting protein 1 [Source:HGNC Symbol;Acc:HGNC:18708]
23438	HARS2	histidyl-tRNA synthetase 2, mitochondrial [Source:HGNC Symbol;Acc:HGNC:4817]
23451	SF3B1	splicing factor 3b subunit 1 [Source:HGNC Symbol;Acc:HGNC:10768]
23560	GTPBP4	GTP binding protein 4 [Source:HGNC Symbol;Acc:HGNC:21535]
23660	ZKSCAN5	zinc finger with KRAB and SCAN domains 5 [Source:HGNC Symbol;Acc:HGNC:12867]
23671	TMEFF2	transmembrane protein with EGF like and two follistatin like domains 2 [Source:HGNC Symbol;Acc:HGNC:11867]
23677	SH3BP4	SH3 domain binding protein 4 [Source:HGNC Symbol;Acc:HGNC:10826]
246184	CDC26	cell division cycle 26 [Source:HGNC Symbol;Acc:HGNC:17839]
253152	EPHX4	epoxide hydrolase 4 [Source:HGNC Symbol;Acc:HGNC:23758]
253190	SERHL2	serine hydrolase like 2 [Source:HGNC Symbol;Acc:HGNC:29446]
2549	GAB1	GRB2 associated binding protein 1 [Source:HGNC Symbol;Acc:HGNC:4066]
255928	SYT14	synaptotagmin 14 [Source:HGNC Symbol;Acc:HGNC:23143]
256126	SYCE2	synaptonemal complex central element protein 2 [Source:HGNC Symbol;Acc:HGNC:27411]
256281	NUDT14	nudix hydrolase 14 [Source:HGNC Symbol;Acc:HGNC:20141]
257169	C9orf43	chromosome 9 open reading frame 43 [Source:HGNC Symbol;Acc:HGNC:23570]
25831	HECTD1	HECT domain E3 ubiquitin protein ligase 1 [Source:HGNC Symbol;Acc:HGNC:20157]
25864	ABHD14A	abhydrolase domain containing 14A [Source:HGNC Symbol;Acc:HGNC:24538]
25904	CNOT10	CCR4-NOT transcription complex subunit 10 [Source:HGNC Symbol;Acc:HGNC:23817]
25915	NDUFAF3	NADH:ubiquinone oxidoreductase complex assembly factor 3 [Source:HGNC Symbol;Acc:HGNC:29918]
25942	SIN3A	SIN3 transcription regulator family member A [Source:HGNC Symbol;Acc:HGNC:19353]
25966	C2CD2	C2 calcium dependent domain containing 2 [Source:HGNC Symbol;Acc:HGNC:1266]
25973	PARS2	prolyl-tRNA synthetase 2, mitochondrial [Source:HGNC Symbol;Acc:HGNC:30563]
25981	DNAH1	dynein axonemal heavy chain 1 [Source:HGNC Symbol;Acc:HGNC:2940]
26036	ZNF451	zinc finger protein 451 [Source:HGNC Symbol;Acc:HGNC:21091]
26056	RAB11FIP5	RAB11 family interacting protein 5 [Source:HGNC Symbol;Acc:HGNC:24845]
26127	FGFR1OP2	FGFR1 oncogene partner 2 [Source:HGNC Symbol;Acc:HGNC:23098]
26133	TRPC4AP	transient receptor potential cation channel subfamily C member 4 associated protein [Source:HGNC Symbol;Acc:HGNC:16181]
261734	NPHP4	nephrocystin 4 [Source:HGNC Symbol;Acc:HGNC:19104]
26958	COPG2	COPI coat complex subunit gamma 2 [Source:HGNC Symbol;Acc:HGNC:2237]
26995	TRUB2	TruB pseudouridine synthase family member 2 [Source:HGNC Symbol;Acc:HGNC:17170]
27035	NOX1	NADPH oxidase 1 [Source:HGNC Symbol;Acc:HGNC:7889]
27042	UTP25	UTP25 small subunit processor component [Source:HGNC Symbol;Acc:HGNC:28440]
27043	PELP1	proline, glutamate and leucine rich protein 1 [Source:HGNC Symbol;Acc:HGNC:30134]
27077	B9D1	B9 domain containing 1 [Source:HGNC Symbol;Acc:HGNC:24123]
27092	CACNG4	calcium voltage-gated channel auxiliary subunit gamma 4 [Source:HGNC Symbol;Acc:HGNC:1408]
27111	SDCBP2	syndecan binding protein 2 [Source:HGNC Symbol;Acc:HGNC:15756]
27146	FAM184B	family with sequence similarity 184 member B [Source:HGNC Symbol;Acc:HGNC:29235]
27235	COQ2	coenzyme Q2, polyprenyltransferase [Source:HGNC Symbol;Acc:HGNC:25223]
27241	BBS9	Bardet-Biedl syndrome 9 [Source:HGNC Symbol;Acc:HGNC:30000]
27247	NFU1	NFU1 iron-sulfur cluster scaffold [Source:HGNC Symbol;Acc:HGNC:16287]
2733	GLE1	GLE1 RNA export mediator [Source:HGNC Symbol;Acc:HGNC:4315]
27336	HTATSF1	HIV-1 Tat specific factor 1 [Source:HGNC Symbol;Acc:HGNC:5276]
2802	GOLGA3	golgin A3 [Source:HGNC Symbol;Acc:HGNC:4426]
2843	GPR20	G protein-coupled receptor 20 [Source:HGNC Symbol;Acc:HGNC:4475]
284361	EMC10	ER membrane protein complex subunit 10 [Source:HGNC Symbol;Acc:HGNC:27609]
285148	IAH1	isoamyl acetate hydrolyzing esterase 1 (putative) [Source:HGNC Symbol;Acc:HGNC:27696]
2893	GRIA4	glutamate ionotropic receptor AMPA type subunit 4 [Source:HGNC Symbol;Acc:HGNC:4574]
28969	BZW2	basic leucine zipper and W2 domains 2 [Source:HGNC Symbol;Acc:HGNC:18808]
28977	MRPL42	mitochondrial ribosomal protein L42 [Source:HGNC Symbol;Acc:HGNC:14493]
29066	ZC3H7A	zinc finger CCCH-type containing 7A [Source:HGNC Symbol;Acc:HGNC:30959]
29087	THYN1	thymocyte nuclear protein 1 [Source:HGNC Symbol;Acc:HGNC:29560]
2956	MSH6	mutS homolog 6 [Source:HGNC Symbol;Acc:HGNC:7329]
2969	GTF2I	general transcription factor IIi [Source:HGNC Symbol;Acc:HGNC:4659]
2972	BRF1	BRF1 RNA polymerase III transcription initiation factor subunit [Source:HGNC Symbol;Acc:HGNC:11551]
29899	GPSM2	G protein signaling modulator 2 [Source:HGNC Symbol;Acc:HGNC:29501]
29902	FAM216A	family with sequence similarity 216 member A [Source:HGNC Symbol;Acc:HGNC:30180]
3020	H3-3A	H3.3 histone A [Source:HGNC Symbol;Acc:HGNC:4764]
30849	PIK3R4	phosphoinositide-3-kinase regulatory subunit 4 [Source:HGNC Symbol;Acc:HGNC:8982]
309	ANXA6	annexin A6 [Source:HGNC Symbol;Acc:HGNC:544]
3150	HMGN1	high mobility group nucleosome binding domain 1 [Source:HGNC Symbol;Acc:HGNC:4984]
3190	HNRNPK	heterogeneous nuclear ribonucleoprotein K [Source:HGNC Symbol;Acc:HGNC:5044]
339324	ZNF260	zinc finger protein 260 [Source:HGNC Symbol;Acc:HGNC:13499]
340719	NANOS1	nanos C2HC-type zinc finger 1 [Source:HGNC Symbol;Acc:HGNC:23044]
347240	KIF24	kinesin family member 24 [Source:HGNC Symbol;Acc:HGNC:19916]
3476	IGBP1	immunoglobulin binding protein 1 [Source:HGNC Symbol;Acc:HGNC:5461]
348995	NUP43	nucleoporin 43 [Source:HGNC Symbol;Acc:HGNC:21182]
3612	IMPA1	inositol monophosphatase 1 [Source:HGNC Symbol;Acc:HGNC:6050]
3628	INPP1	inositol polyphosphate-1-phosphatase [Source:HGNC Symbol;Acc:HGNC:6071]
388021	TMEM179	transmembrane protein 179 [Source:HGNC Symbol;Acc:HGNC:20137]
388588	SMIM1	small integral membrane protein 1 (Vel blood group) [Source:HGNC Symbol;Acc:HGNC:44204]
389203	SMIM20	small integral membrane protein 20 [Source:HGNC Symbol;Acc:HGNC:37260]
390213	DOC2GP	double C2 domain gamma, pseudogene [Source:HGNC Symbol;Acc:HGNC:37962]
3921	RPSA	ribosomal protein SA [Source:HGNC Symbol;Acc:HGNC:6502]
399818	EEF1AKMT2	EEF1A lysine methyltransferase 2 [Source:HGNC Symbol;Acc:HGNC:33787]
400569	MED11	mediator complex subunit 11 [Source:HGNC Symbol;Acc:HGNC:32687]
401541	CENPP	centromere protein P [Source:HGNC Symbol;Acc:HGNC:32933]
401612	SLC25A53	solute carrier family 25 member 53 [Source:HGNC Symbol;Acc:HGNC:31894]
402	ARL2.00	ADP ribosylation factor like GTPase 2 [Source:HGNC Symbol;Acc:HGNC:693]
4134	MAP4	microtubule associated protein 4 [Source:HGNC Symbol;Acc:HGNC:6862]
4194	MDM4	MDM4 regulator of p53 [Source:HGNC Symbol;Acc:HGNC:6974]
4289	MKLN1	muskelin 1 [Source:HGNC Symbol;Acc:HGNC:7109]
4435	CITED1	Cbp/p300 interacting transactivator with Glu/Asp rich carboxy-terminal domain 1 [Source:HGNC Symbol;Acc:HGNC:1986]
4489	MT1A	metallothionein 1A [Source:HGNC Symbol;Acc:HGNC:7393]
4501	MT1X	metallothionein 1X [Source:HGNC Symbol;Acc:HGNC:7405]
4507	MTAP	methylthioadenosine phosphorylase [Source:HGNC Symbol;Acc:HGNC:7413]
4591	TRIM37	tripartite motif containing 37 [Source:HGNC Symbol;Acc:HGNC:7523]
4826	NNAT	neuronatin [Source:HGNC Symbol;Acc:HGNC:7860]
4904	YBX1	Y-box binding protein 1 [Source:HGNC Symbol;Acc:HGNC:8014]
50717	DCAF8	DDB1 and CUL4 associated factor 8 [Source:HGNC Symbol;Acc:HGNC:24891]
51001	MTERF3	mitochondrial transcription termination factor 3 [Source:HGNC Symbol;Acc:HGNC:24258]
51067	YARS2	tyrosyl-tRNA synthetase 2 [Source:HGNC Symbol;Acc:HGNC:24249]
51068	NMD3	NMD3 ribosome export adaptor [Source:HGNC Symbol;Acc:HGNC:24250]
51073	MRPL4	mitochondrial ribosomal protein L4 [Source:HGNC Symbol;Acc:HGNC:14276]
51074	APIP	APAF1 interacting protein [Source:HGNC Symbol;Acc:HGNC:17581]
51076	CUTC	cutC copper transporter [Source:HGNC Symbol;Acc:HGNC:24271]
51077	FCF1	FCF1 rRNA-processing protein [Source:HGNC Symbol;Acc:HGNC:20220]
51100	SH3GLB1	SH3 domain containing GRB2 like, endophilin B1 [Source:HGNC Symbol;Acc:HGNC:10833]
51142	CHCHD2	coiled-coil-helix-coiled-coil-helix domain containing 2 [Source:HGNC Symbol;Acc:HGNC:21645]
51231	VRK3	VRK serine/threonine kinase 3 [Source:HGNC Symbol;Acc:HGNC:18996]
51236	HGH1	HGH1 homolog [Source:HGNC Symbol;Acc:HGNC:24161]
51244	CCDC174	coiled-coil domain containing 174 [Source:HGNC Symbol;Acc:HGNC:28033]
51248	PDZD11	PDZ domain containing 11 [Source:HGNC Symbol;Acc:HGNC:28034]
51367	POP5	POP5 homolog, ribonuclease P/MRP subunit [Source:HGNC Symbol;Acc:HGNC:17689]
5144	PDE4D	phosphodiesterase 4D [Source:HGNC Symbol;Acc:HGNC:8783]
51455	REV1	REV1 DNA directed polymerase [Source:HGNC Symbol;Acc:HGNC:14060]
51566	ARMCX3	armadillo repeat containing X-linked 3 [Source:HGNC Symbol;Acc:HGNC:24065]
51650	MRPS33	mitochondrial ribosomal protein S33 [Source:HGNC Symbol;Acc:HGNC:16634]
51654	CDK5RAP1	CDK5 regulatory subunit associated protein 1 [Source:HGNC Symbol;Acc:HGNC:15880]
51693	TRAPPC2L	trafficking protein particle complex 2 like [Source:HGNC Symbol;Acc:HGNC:30887]
5274	SERPINI1	serpin family I member 1 [Source:HGNC Symbol;Acc:HGNC:8943]
5355	PLP2	proteolipid protein 2 [Source:HGNC Symbol;Acc:HGNC:9087]
53838	C11orf24	chromosome 11 open reading frame 24 [Source:HGNC Symbol;Acc:HGNC:1174]
54148	MRPL39	mitochondrial ribosomal protein L39 [Source:HGNC Symbol;Acc:HGNC:14027]
54529	ASNSD1	asparagine synthetase domain containing 1 [Source:HGNC Symbol;Acc:HGNC:24910]
54795	TRPM4	transient receptor potential cation channel subfamily M member 4 [Source:HGNC Symbol;Acc:HGNC:17993]
54841	BIVM	basic, immunoglobulin-like variable motif containing [Source:HGNC Symbol;Acc:HGNC:16034]
54856	GON4L	gon-4 like [Source:HGNC Symbol;Acc:HGNC:25973]
54963	UCKL1	uridine-cytidine kinase 1 like 1 [Source:HGNC Symbol;Acc:HGNC:15938]
5501	PPP1CC	protein phosphatase 1 catalytic subunit gamma [Source:HGNC Symbol;Acc:HGNC:9283]
55011	PIH1D1	PIH1 domain containing 1 [Source:HGNC Symbol;Acc:HGNC:26075]
55013	MCUB	mitochondrial calcium uniporter dominant negative subunit beta [Source:HGNC Symbol;Acc:HGNC:26076]
55038	CDCA4	cell division cycle associated 4 [Source:HGNC Symbol;Acc:HGNC:14625]
55071	C9orf40	chromosome 9 open reading frame 40 [Source:HGNC Symbol;Acc:HGNC:23433]
55074	OXR1	oxidation resistance 1 [Source:HGNC Symbol;Acc:HGNC:15822]
55081	IFT57	intraflagellar transport 57 [Source:HGNC Symbol;Acc:HGNC:17367]
55084	SOBP	sine oculis binding protein homolog [Source:HGNC Symbol;Acc:HGNC:29256]
55086	RADX	RPA1 related single stranded DNA binding protein, X-linked [Source:HGNC Symbol;Acc:HGNC:25486]
55112	WDR60	WD repeat domain 60 [Source:HGNC Symbol;Acc:HGNC:21862]
55122	AKIRIN2	akirin 2 [Source:HGNC Symbol;Acc:HGNC:21407]
55144	LRRC8D	leucine rich repeat containing 8 VRAC subunit D [Source:HGNC Symbol;Acc:HGNC:16992]
55157	DARS2	aspartyl-tRNA synthetase 2, mitochondrial [Source:HGNC Symbol;Acc:HGNC:25538]
5518	PPP2R1A	protein phosphatase 2 scaffold subunit Aalpha [Source:HGNC Symbol;Acc:HGNC:9302]
55197	RPRD1A	regulation of nuclear pre-mRNA domain containing 1A [Source:HGNC Symbol;Acc:HGNC:25560]
55207	ARL8B	ADP ribosylation factor like GTPase 8B [Source:HGNC Symbol;Acc:HGNC:25564]
55226	NAT10	N-acetyltransferase 10 [Source:HGNC Symbol;Acc:HGNC:29830]
55228	PNMA8A	PNMA family member 8A [Source:HGNC Symbol;Acc:HGNC:25578]
55248	PACC1	proton activated chloride channel 1 [Source:HGNC Symbol;Acc:HGNC:25593]
55274	PHF10	PHD finger protein 10 [Source:HGNC Symbol;Acc:HGNC:18250]
55278	QRSL1	glutaminyl-tRNA amidotransferase subunit QRSL1 [Source:HGNC Symbol;Acc:HGNC:21020]
5529	PPP2R5E	protein phosphatase 2 regulatory subunit B'epsilon [Source:HGNC Symbol;Acc:HGNC:9313]
55333	SYNJ2BP	synaptojanin 2 binding protein [Source:HGNC Symbol;Acc:HGNC:18955]
55352	COPRS	coordinator of PRMT5 and differentiation stimulator [Source:HGNC Symbol;Acc:HGNC:28848]
5537	PPP6C	protein phosphatase 6 catalytic subunit [Source:HGNC Symbol;Acc:HGNC:9323]
55425	GPALPP1	GPALPP motifs containing 1 [Source:HGNC Symbol;Acc:HGNC:20298]
55505	NOP10	NOP10 ribonucleoprotein [Source:HGNC Symbol;Acc:HGNC:14378]
55529	PIP4P2	phosphatidylinositol-4,5-bisphosphate 4-phosphatase 2 [Source:HGNC Symbol;Acc:HGNC:25452]
55565	ZNF821	zinc finger protein 821 [Source:HGNC Symbol;Acc:HGNC:28043]
55608	ANKRD10	ankyrin repeat domain 10 [Source:HGNC Symbol;Acc:HGNC:20265]
55625	ZDHHC7	zinc finger DHHC-type palmitoyltransferase 7 [Source:HGNC Symbol;Acc:HGNC:18459]
55644	OSGEP	O-sialoglycoprotein endopeptidase [Source:HGNC Symbol;Acc:HGNC:18028]
55683	KANSL3	KAT8 regulatory NSL complex subunit 3 [Source:HGNC Symbol;Acc:HGNC:25473]
55684	RABL6	RAB, member RAS oncogene family like 6 [Source:HGNC Symbol;Acc:HGNC:24703]
55687	TRMU	tRNA 5-methylaminomethyl-2-thiouridylate methyltransferase [Source:HGNC Symbol;Acc:HGNC:25481]
55689	YEATS2	YEATS domain containing 2 [Source:HGNC Symbol;Acc:HGNC:25489]
55720	TSR1	TSR1 ribosome maturation factor [Source:HGNC Symbol;Acc:HGNC:25542]
55765	INAVA	innate immunity activator [Source:HGNC Symbol;Acc:HGNC:25599]
55844	PPP2R2D	protein phosphatase 2 regulatory subunit Bdelta [Source:HGNC Symbol;Acc:HGNC:23732]
55850	USE1	unconventional SNARE in the ER 1 [Source:HGNC Symbol;Acc:HGNC:30882]
55861	DBNDD2	dysbindin domain containing 2 [Source:HGNC Symbol;Acc:HGNC:15881]
55863	TMEM126B	transmembrane protein 126B [Source:HGNC Symbol;Acc:HGNC:30883]
55924	INKA2	inka box actin regulator 2 [Source:HGNC Symbol;Acc:HGNC:28045]
56000	NXF3	nuclear RNA export factor 3 [Source:HGNC Symbol;Acc:HGNC:8073]
56171	DNAH7	dynein axonemal heavy chain 7 [Source:HGNC Symbol;Acc:HGNC:18661]
56252	YLPM1	YLP motif containing 1 [Source:HGNC Symbol;Acc:HGNC:17798]
56271	BEX4	brain expressed X-linked 4 [Source:HGNC Symbol;Acc:HGNC:25475]
56478	EIF4ENIF1	eukaryotic translation initiation factor 4E nuclear import factor 1 [Source:HGNC Symbol;Acc:HGNC:16687]
56889	TM9SF3	transmembrane 9 superfamily member 3 [Source:HGNC Symbol;Acc:HGNC:21529]
56941	HMCES	5-hydroxymethylcytosine binding, ES cell specific [Source:HGNC Symbol;Acc:HGNC:24446]
56951	C5orf15	chromosome 5 open reading frame 15 [Source:HGNC Symbol;Acc:HGNC:20656]
56965	PARP6	poly(ADP-ribose) polymerase family member 6 [Source:HGNC Symbol;Acc:HGNC:26921]
570	BAAT	bile acid-CoA:amino acid N-acyltransferase [Source:HGNC Symbol;Acc:HGNC:932]
57035	RSRP1	arginine and serine rich protein 1 [Source:HGNC Symbol;Acc:HGNC:25234]
57037	ANKMY2	ankyrin repeat and MYND domain containing 2 [Source:HGNC Symbol;Acc:HGNC:25370]
57038	RARS2	arginyl-tRNA synthetase 2, mitochondrial [Source:HGNC Symbol;Acc:HGNC:21406]
57048	PLSCR3	phospholipid scramblase 3 [Source:HGNC Symbol;Acc:HGNC:16495]
57062	DDX24	DEAD-box helicase 24 [Source:HGNC Symbol;Acc:HGNC:13266]
57153	SLC44A2	solute carrier family 44 member 2 [Source:HGNC Symbol;Acc:HGNC:17292]
5716	PSMD10	proteasome 26S subunit, non-ATPase 10 [Source:HGNC Symbol;Acc:HGNC:9555]
57215	THAP11	THAP domain containing 11 [Source:HGNC Symbol;Acc:HGNC:23194]
57325	KAT14	lysine acetyltransferase 14 [Source:HGNC Symbol;Acc:HGNC:15904]
57407	NMRAL1	NmrA like redox sensor 1 [Source:HGNC Symbol;Acc:HGNC:24987]
57470	LRRC47	leucine rich repeat containing 47 [Source:HGNC Symbol;Acc:HGNC:29207]
57488	ESYT2	extended synaptotagmin 2 [Source:HGNC Symbol;Acc:HGNC:22211]
57506	MAVS	mitochondrial antiviral signaling protein [Source:HGNC Symbol;Acc:HGNC:29233]
57511	COG6	component of oligomeric golgi complex 6 [Source:HGNC Symbol;Acc:HGNC:18621]
57536	KIAA1328	KIAA1328 [Source:HGNC Symbol;Acc:HGNC:29248]
57570	TRMT5	tRNA methyltransferase 5 [Source:HGNC Symbol;Acc:HGNC:23141]
57645	POGK	pogo transposable element derived with KRAB domain [Source:HGNC Symbol;Acc:HGNC:18800]
57655	GRAMD1A	GRAM domain containing 1A [Source:HGNC Symbol;Acc:HGNC:29305]
57665	RDH14	retinol dehydrogenase 14 [Source:HGNC Symbol;Acc:HGNC:19979]
5814	PURB	purine rich element binding protein B [Source:HGNC Symbol;Acc:HGNC:9702]
58480	RHOU	ras homolog family member U [Source:HGNC Symbol;Acc:HGNC:17794]
5875	RABGGTA	Rab geranylgeranyltransferase subunit alpha [Source:HGNC Symbol;Acc:HGNC:9795]
5876	RABGGTB	Rab geranylgeranyltransferase subunit beta [Source:HGNC Symbol;Acc:HGNC:9796]
5927	KDM5A	lysine demethylase 5A [Source:HGNC Symbol;Acc:HGNC:9886]
59343	SENP2	SUMO specific peptidase 2 [Source:HGNC Symbol;Acc:HGNC:23116]
6002	RGS12	regulator of G protein signaling 12 [Source:HGNC Symbol;Acc:HGNC:9994]
60528	ELAC2	elaC ribonuclease Z 2 [Source:HGNC Symbol;Acc:HGNC:14198]
60672	MIIP	migration and invasion inhibitory protein [Source:HGNC Symbol;Acc:HGNC:25715]
60678	EEFSEC	eukaryotic elongation factor, selenocysteine-tRNA specific [Source:HGNC Symbol;Acc:HGNC:24614]
6125	RPL5	ribosomal protein L5 [Source:HGNC Symbol;Acc:HGNC:10360]
6130	RPL7A	ribosomal protein L7a [Source:HGNC Symbol;Acc:HGNC:10364]
6137	RPL13	ribosomal protein L13 [Source:HGNC Symbol;Acc:HGNC:10303]
6142	RPL18A	ribosomal protein L18a [Source:HGNC Symbol;Acc:HGNC:10311]
6144	RPL21	ribosomal protein L21 [Source:HGNC Symbol;Acc:HGNC:10313]
6154	RPL26	ribosomal protein L26 [Source:HGNC Symbol;Acc:HGNC:10327]
6156	RPL30	ribosomal protein L30 [Source:HGNC Symbol;Acc:HGNC:10333]
6160	RPL31	ribosomal protein L31 [Source:HGNC Symbol;Acc:HGNC:10334]
6161	RPL32	ribosomal protein L32 [Source:HGNC Symbol;Acc:HGNC:10336]
6167	RPL37	ribosomal protein L37 [Source:HGNC Symbol;Acc:HGNC:10347]
6168	RPL37A	ribosomal protein L37a [Source:HGNC Symbol;Acc:HGNC:10348]
6169	RPL38	ribosomal protein L38 [Source:HGNC Symbol;Acc:HGNC:10349]
617	BCS1L	BCS1 homolog, ubiquinol-cytochrome c reductase complex chaperone [Source:HGNC Symbol;Acc:HGNC:1020]
6171	RPL41	ribosomal protein L41 [Source:HGNC Symbol;Acc:HGNC:10354]
6173	RPL36A	ribosomal protein L36a [Source:HGNC Symbol;Acc:HGNC:10359]
6176	RPLP1	ribosomal protein lateral stalk subunit P1 [Source:HGNC Symbol;Acc:HGNC:10372]
6181	RPLP2	ribosomal protein lateral stalk subunit P2 [Source:HGNC Symbol;Acc:HGNC:10377]
619279	ZNF704	zinc finger protein 704 [Source:HGNC Symbol;Acc:HGNC:32291]
6205	RPS11	ribosomal protein S11 [Source:HGNC Symbol;Acc:HGNC:10384]
6209	RPS15	ribosomal protein S15 [Source:HGNC Symbol;Acc:HGNC:10388]
6210	RPS15A	ribosomal protein S15a [Source:HGNC Symbol;Acc:HGNC:10389]
6218	RPS17	ribosomal protein S17 [Source:HGNC Symbol;Acc:HGNC:10397]
6227	RPS21	ribosomal protein S21 [Source:HGNC Symbol;Acc:HGNC:10409]
6228	RPS23	ribosomal protein S23 [Source:HGNC Symbol;Acc:HGNC:10410]
6229	RPS24	ribosomal protein S24 [Source:HGNC Symbol;Acc:HGNC:10411]
6230	RPS25	ribosomal protein S25 [Source:HGNC Symbol;Acc:HGNC:10413]
6232	RPS27	ribosomal protein S27 [Source:HGNC Symbol;Acc:HGNC:10416]
6301	SARS1	seryl-tRNA synthetase 1 [Source:HGNC Symbol;Acc:HGNC:10537]
6388	SDF2	stromal cell derived factor 2 [Source:HGNC Symbol;Acc:HGNC:10675]
63894	VIPAS39	VPS33B interacting protein, apical-basolateral polarity regulator, spe-39 homolog [Source:HGNC Symbol;Acc:HGNC:20347]
63905	MANBAL	mannosidase beta like [Source:HGNC Symbol;Acc:HGNC:15799]
63925	ZNF335	zinc finger protein 335 [Source:HGNC Symbol;Acc:HGNC:15807]
64121	RRAGC	Ras related GTP binding C [Source:HGNC Symbol;Acc:HGNC:19902]
64151	NCAPG	non-SMC condensin I complex subunit G [Source:HGNC Symbol;Acc:HGNC:24304]
64210	MMS19	MMS19 homolog, cytosolic iron-sulfur assembly component [Source:HGNC Symbol;Acc:HGNC:13824]
64422	ATG3	autophagy related 3 [Source:HGNC Symbol;Acc:HGNC:20962]
64428	CIAO3	cytosolic iron-sulfur assembly component 3 [Source:HGNC Symbol;Acc:HGNC:14179]
64429	ZDHHC6	zinc finger DHHC-type palmitoyltransferase 6 [Source:HGNC Symbol;Acc:HGNC:19160]
64689	GORASP1	golgi reassembly stacking protein 1 [Source:HGNC Symbol;Acc:HGNC:16769]
64776	C11orf1	chromosome 11 open reading frame 1 [Source:HGNC Symbol;Acc:HGNC:1163]
64777	RMND5B	required for meiotic nuclear division 5 homolog B [Source:HGNC Symbol;Acc:HGNC:26181]
64856	VWA1	von Willebrand factor A domain containing 1 [Source:HGNC Symbol;Acc:HGNC:30910]
65095	KRI1	KRI1 homolog [Source:HGNC Symbol;Acc:HGNC:25769]
653319	KIAA0895L	KIAA0895 like [Source:HGNC Symbol;Acc:HGNC:34408]
654364	NME1-NME2	NME1-NME2 readthrough [Source:HGNC Symbol;Acc:HGNC:33531]
65981	CAPRIN2	caprin family member 2 [Source:HGNC Symbol;Acc:HGNC:21259]
6619	SNAPC3	small nuclear RNA activating complex polypeptide 3 [Source:HGNC Symbol;Acc:HGNC:11136]
6635	SNRPE	small nuclear ribonucleoprotein polypeptide E [Source:HGNC Symbol;Acc:HGNC:11161]
6744	ITPRID2	ITPR interacting domain containing 2 [Source:HGNC Symbol;Acc:HGNC:11319]
6854	SYN2	synapsin II [Source:HGNC Symbol;Acc:HGNC:11495]
6882	TAF11	TATA-box binding protein associated factor 11 [Source:HGNC Symbol;Acc:HGNC:11544]
689	BTF3	basic transcription factor 3 [Source:HGNC Symbol;Acc:HGNC:1125]
6921	ELOC	elongin C [Source:HGNC Symbol;Acc:HGNC:11617]
6993	DYNLT1	dynein light chain Tctex-type 1 [Source:HGNC Symbol;Acc:HGNC:11697]
7025	NR2F1	nuclear receptor subfamily 2 group F member 1 [Source:HGNC Symbol;Acc:HGNC:7975]
7105	TSPAN6	tetraspanin 6 [Source:HGNC Symbol;Acc:HGNC:11858]
7156	TOP3A	DNA topoisomerase III alpha [Source:HGNC Symbol;Acc:HGNC:11992]
7165	TPD52L2	TPD52 like 2 [Source:HGNC Symbol;Acc:HGNC:12007]
7175	TPR	translocated promoter region, nuclear basket protein [Source:HGNC Symbol;Acc:HGNC:12017]
727866	FAM156B	family with sequence similarity 156 member B [Source:HGNC Symbol;Acc:HGNC:31962]
7322	UBE2D2	ubiquitin conjugating enzyme E2 D2 [Source:HGNC Symbol;Acc:HGNC:12475]
7342	UBP1	upstream binding protein 1 [Source:HGNC Symbol;Acc:HGNC:12507]
7347	UCHL3	ubiquitin C-terminal hydrolase L3 [Source:HGNC Symbol;Acc:HGNC:12515]
740	MRPL49	mitochondrial ribosomal protein L49 [Source:HGNC Symbol;Acc:HGNC:1176]
7444	VRK2	VRK serine/threonine kinase 2 [Source:HGNC Symbol;Acc:HGNC:12719]
754	PTTG1IP	PTTG1 interacting protein [Source:HGNC Symbol;Acc:HGNC:13524]
7644	ZNF91	zinc finger protein 91 [Source:HGNC Symbol;Acc:HGNC:13166]
7732	RNF112	ring finger protein 112 [Source:HGNC Symbol;Acc:HGNC:12968]
7737	RNF113A	ring finger protein 113A [Source:HGNC Symbol;Acc:HGNC:12974]
7803	PTP4A1	protein tyrosine phosphatase 4A1 [Source:HGNC Symbol;Acc:HGNC:9634]
78987	CRELD1	cysteine rich with EGF like domains 1 [Source:HGNC Symbol;Acc:HGNC:14630]
79003	MIS12	MIS12 kinetochore complex component [Source:HGNC Symbol;Acc:HGNC:24967]
79072	FASTKD3	FAST kinase domains 3 [Source:HGNC Symbol;Acc:HGNC:28758]
79135	APOO	apolipoprotein O [Source:HGNC Symbol;Acc:HGNC:28727]
79159	NOL12	nucleolar protein 12 [Source:HGNC Symbol;Acc:HGNC:28585]
79172	CENPO	centromere protein O [Source:HGNC Symbol;Acc:HGNC:28152]
79178	THTPA	thiamine triphosphatase [Source:HGNC Symbol;Acc:HGNC:18987]
79184	BRCC3	BRCA1/BRCA2-containing complex subunit 3 [Source:HGNC Symbol;Acc:HGNC:24185]
7923	HSD17B8	hydroxysteroid 17-beta dehydrogenase 8 [Source:HGNC Symbol;Acc:HGNC:3554]
79369	B3GNT4	UDP-GlcNAc:betaGal beta-1,3-N-acetylglucosaminyltransferase 4 [Source:HGNC Symbol;Acc:HGNC:15683]
79447	PAGR1	PAXIP1 associated glutamate rich protein 1 [Source:HGNC Symbol;Acc:HGNC:28707]
79576	NKAP	NFKB activating protein [Source:HGNC Symbol;Acc:HGNC:29873]
79587	CARS2	cysteinyl-tRNA synthetase 2, mitochondrial [Source:HGNC Symbol;Acc:HGNC:25695]
79589	RNF128	ring finger protein 128 [Source:HGNC Symbol;Acc:HGNC:21153]
79622	SNRNP25	small nuclear ribonucleoprotein U11/U12 subunit 25 [Source:HGNC Symbol;Acc:HGNC:14161]
79717	PPCS	phosphopantothenoylcysteine synthetase [Source:HGNC Symbol;Acc:HGNC:25686]
79739	TTLL7	tubulin tyrosine ligase like 7 [Source:HGNC Symbol;Acc:HGNC:26242]
79744	ZNF419	zinc finger protein 419 [Source:HGNC Symbol;Acc:HGNC:20648]
79794	C12orf49	chromosome 12 open reading frame 49 [Source:HGNC Symbol;Acc:HGNC:26128]
79815	NIPAL2	NIPA like domain containing 2 [Source:HGNC Symbol;Acc:HGNC:25854]
79833	GEMIN6	gem nuclear organelle associated protein 6 [Source:HGNC Symbol;Acc:HGNC:20044]
79896	THNSL1	threonine synthase like 1 [Source:HGNC Symbol;Acc:HGNC:26160]
79903	NAA60	N-alpha-acetyltransferase 60, NatF catalytic subunit [Source:HGNC Symbol;Acc:HGNC:25875]
79918	SETD6	SET domain containing 6, protein lysine methyltransferase [Source:HGNC Symbol;Acc:HGNC:26116]
80195	TMEM254	transmembrane protein 254 [Source:HGNC Symbol;Acc:HGNC:25804]
80206	FHOD3	formin homology 2 domain containing 3 [Source:HGNC Symbol;Acc:HGNC:26178]
80230	RUFY1	RUN and FYVE domain containing 1 [Source:HGNC Symbol;Acc:HGNC:19760]
80254	CEP63	centrosomal protein 63 [Source:HGNC Symbol;Acc:HGNC:25815]
80279	CDK5RAP3	CDK5 regulatory subunit associated protein 3 [Source:HGNC Symbol;Acc:HGNC:18673]
80349	WDR61	WD repeat domain 61 [Source:HGNC Symbol;Acc:HGNC:30300]
80723	SLC35G2	solute carrier family 35 member G2 [Source:HGNC Symbol;Acc:HGNC:28480]
80746	TSEN2	tRNA splicing endonuclease subunit 2 [Source:HGNC Symbol;Acc:HGNC:28422]
80790	CMIP	c-Maf inducing protein [Source:HGNC Symbol;Acc:HGNC:24319]
80820	EEPD1	endonuclease/exonuclease/phosphatase family domain containing 1 [Source:HGNC Symbol;Acc:HGNC:22223]
81558	FAM117A	family with sequence similarity 117 member A [Source:HGNC Symbol;Acc:HGNC:24179]
8216	LZTR1	leucine zipper like transcription regulator 1 [Source:HGNC Symbol;Acc:HGNC:6742]
829	CAPZA1	capping actin protein of muscle Z-line subunit alpha 1 [Source:HGNC Symbol;Acc:HGNC:1488]
83640	RAMAC	RNA guanine-7 methyltransferase activating subunit [Source:HGNC Symbol;Acc:HGNC:31022]
83658	DYNLRB1	dynein light chain roadblock-type 1 [Source:HGNC Symbol;Acc:HGNC:15468]
83693	HSDL1	hydroxysteroid dehydrogenase like 1 [Source:HGNC Symbol;Acc:HGNC:16475]
83694	RPS6KL1	ribosomal protein S6 kinase like 1 [Source:HGNC Symbol;Acc:HGNC:20222]
83879	CDCA7	cell division cycle associated 7 [Source:HGNC Symbol;Acc:HGNC:14628]
84124	ZNF394	zinc finger protein 394 [Source:HGNC Symbol;Acc:HGNC:18832]
84162	KIAA1109	KIAA1109 [Source:HGNC Symbol;Acc:HGNC:26953]
84191	CIAO2A	cytosolic iron-sulfur assembly component 2A [Source:HGNC Symbol;Acc:HGNC:26235]
84232	MAF1.00	MAF1 homolog, negative regulator of RNA polymerase III [Source:HGNC Symbol;Acc:HGNC:24966]
84259	DCUN1D5	defective in cullin neddylation 1 domain containing 5 [Source:HGNC Symbol;Acc:HGNC:28409]
84262	PSMG3	proteasome assembly chaperone 3 [Source:HGNC Symbol;Acc:HGNC:22420]
84264	HAGHL	hydroxyacylglutathione hydrolase like [Source:HGNC Symbol;Acc:HGNC:14177]
84280	BTBD10	BTB domain containing 10 [Source:HGNC Symbol;Acc:HGNC:21445]
84311	MRPL45	mitochondrial ribosomal protein L45 [Source:HGNC Symbol;Acc:HGNC:16651]
84313	VPS25	vacuolar protein sorting 25 homolog [Source:HGNC Symbol;Acc:HGNC:28122]
84321	THOC3	THO complex 3 [Source:HGNC Symbol;Acc:HGNC:19072]
84364	ARFGAP2	ADP ribosylation factor GTPase activating protein 2 [Source:HGNC Symbol;Acc:HGNC:13504]
8446	DUSP11	dual specificity phosphatase 11 [Source:HGNC Symbol;Acc:HGNC:3066]
84498	FAM120B	family with sequence similarity 120B [Source:HGNC Symbol;Acc:HGNC:21109]
84516	DCTN5	dynactin subunit 5 [Source:HGNC Symbol;Acc:HGNC:24594]
84617	TUBB6	tubulin beta 6 class V [Source:HGNC Symbol;Acc:HGNC:20776]
84668	FAM126A	family with sequence similarity 126 member A [Source:HGNC Symbol;Acc:HGNC:24587]
84680	ACCS	1-aminocyclopropane-1-carboxylate synthase homolog (inactive) [Source:HGNC Symbol;Acc:HGNC:23989]
84726	PRRC2B	proline rich coiled-coil 2B [Source:HGNC Symbol;Acc:HGNC:28121]
84790	TUBA1C	tubulin alpha 1c [Source:HGNC Symbol;Acc:HGNC:20768]
84838	ZNF496	zinc finger protein 496 [Source:HGNC Symbol;Acc:HGNC:23713]
84883	AIFM2	apoptosis inducing factor mitochondria associated 2 [Source:HGNC Symbol;Acc:HGNC:21411]
84893	FBH1	F-box DNA helicase 1 [Source:HGNC Symbol;Acc:HGNC:13620]
84905	ZNF341	zinc finger protein 341 [Source:HGNC Symbol;Acc:HGNC:15992]
84909	AOPEP	aminopeptidase O (putative) [Source:HGNC Symbol;Acc:HGNC:1361]
84916	UTP4	UTP4 small subunit processome component [Source:HGNC Symbol;Acc:HGNC:1983]
84924	ZNF566	zinc finger protein 566 [Source:HGNC Symbol;Acc:HGNC:25919]
84954	MPND	MPN domain containing [Source:HGNC Symbol;Acc:HGNC:25934]
84955	NUDCD1	NudC domain containing 1 [Source:HGNC Symbol;Acc:HGNC:24306]
84991	RBM17	RNA binding motif protein 17 [Source:HGNC Symbol;Acc:HGNC:16944]
8507	ENC1	ectodermal-neural cortex 1 [Source:HGNC Symbol;Acc:HGNC:3345]
8550	MAPKAPK5	MAPK activated protein kinase 5 [Source:HGNC Symbol;Acc:HGNC:6889]
8697	CDC23	cell division cycle 23 [Source:HGNC Symbol;Acc:HGNC:1724]
8724	SNX3	sorting nexin 3 [Source:HGNC Symbol;Acc:HGNC:11174]
8738	CRADD	CASP2 and RIPK1 domain containing adaptor with death domain [Source:HGNC Symbol;Acc:HGNC:2340]
8818	DPM2	dolichyl-phosphate mannosyltransferase subunit 2, regulatory [Source:HGNC Symbol;Acc:HGNC:3006]
8859	STK19	serine/threonine kinase 19 [Source:HGNC Symbol;Acc:HGNC:11398]
88745	RRP36	ribosomal RNA processing 36 [Source:HGNC Symbol;Acc:HGNC:21374]
8883	NAE1	NEDD8 activating enzyme E1 subunit 1 [Source:HGNC Symbol;Acc:HGNC:621]
891	CCNB1	cyclin B1 [Source:HGNC Symbol;Acc:HGNC:1579]
89846	FGD3	FYVE, RhoGEF and PH domain containing 3 [Source:HGNC Symbol;Acc:HGNC:16027]
90135	BTBD6	BTB domain containing 6 [Source:HGNC Symbol;Acc:HGNC:19897]
9015	TAF1A	TATA-box binding protein associated factor, RNA polymerase I subunit A [Source:HGNC Symbol;Acc:HGNC:11532]
90204	ZSWIM1	zinc finger SWIM-type containing 1 [Source:HGNC Symbol;Acc:HGNC:16155]
90268	OTULIN	OTU deubiquitinase with linear linkage specificity [Source:HGNC Symbol;Acc:HGNC:25118]
90417	KNSTRN	kinetochore localized astrin (SPAG5) binding protein [Source:HGNC Symbol;Acc:HGNC:30767]
90701	SEC11C	SEC11 homolog C, signal peptidase complex subunit [Source:HGNC Symbol;Acc:HGNC:23400]
9086	EIF1AY	eukaryotic translation initiation factor 1A Y-linked [Source:HGNC Symbol;Acc:HGNC:3252]
9140	ATG12	autophagy related 12 [Source:HGNC Symbol;Acc:HGNC:588]
9141	PDCD5	programmed cell death 5 [Source:HGNC Symbol;Acc:HGNC:8764]
91445	RNF185	ring finger protein 185 [Source:HGNC Symbol;Acc:HGNC:26783]
91687	CENPL	centromere protein L [Source:HGNC Symbol;Acc:HGNC:17879]
91734	IDI2	isopentenyl-diphosphate delta isomerase 2 [Source:HGNC Symbol;Acc:HGNC:23487]
92211	CDHR1	cadherin related family member 1 [Source:HGNC Symbol;Acc:HGNC:14550]
92400	RBM18	RNA binding motif protein 18 [Source:HGNC Symbol;Acc:HGNC:28413]
92822	ZNF276	zinc finger protein 276 [Source:HGNC Symbol;Acc:HGNC:23330]
9318	COPS2	COP9 signalosome subunit 2 [Source:HGNC Symbol;Acc:HGNC:30747]
9326	ZNHIT3	zinc finger HIT-type containing 3 [Source:HGNC Symbol;Acc:HGNC:12309]
9342	SNAP29	synaptosome associated protein 29 [Source:HGNC Symbol;Acc:HGNC:11133]
9349	RPL23	ribosomal protein L23 [Source:HGNC Symbol;Acc:HGNC:10316]
9360	PPIG	peptidylprolyl isomerase G [Source:HGNC Symbol;Acc:HGNC:14650]
9382	COG1	component of oligomeric golgi complex 1 [Source:HGNC Symbol;Acc:HGNC:6545]
9397	NMT2	N-myristoyltransferase 2 [Source:HGNC Symbol;Acc:HGNC:7858]
9403	SELENOF	selenoprotein F [Source:HGNC Symbol;Acc:HGNC:17705]
94039	ZNF101	zinc finger protein 101 [Source:HGNC Symbol;Acc:HGNC:12881]
9412	MED21	mediator complex subunit 21 [Source:HGNC Symbol;Acc:HGNC:11473]
94134	ARHGAP12	Rho GTPase activating protein 12 [Source:HGNC Symbol;Acc:HGNC:16348]
9445	ITM2B	integral membrane protein 2B [Source:HGNC Symbol;Acc:HGNC:6174]
9477	MED20	mediator complex subunit 20 [Source:HGNC Symbol;Acc:HGNC:16840]
9520	NPEPPS	aminopeptidase puromycin sensitive [Source:HGNC Symbol;Acc:HGNC:7900]
9557	CHD1L	chromodomain helicase DNA binding protein 1 like [Source:HGNC Symbol;Acc:HGNC:1916]
9575	CLOCK	clock circadian regulator [Source:HGNC Symbol;Acc:HGNC:2082]
9611	NCOR1	nuclear receptor corepressor 1 [Source:HGNC Symbol;Acc:HGNC:7672]
9640	ZNF592	zinc finger protein 592 [Source:HGNC Symbol;Acc:HGNC:28986]
9647	PPM1F	protein phosphatase, Mg2+/Mn2+ dependent 1F [Source:HGNC Symbol;Acc:HGNC:19388]
9715	FAM131B	family with sequence similarity 131 member B [Source:HGNC Symbol;Acc:HGNC:22202]
9817	KEAP1	kelch like ECH associated protein 1 [Source:HGNC Symbol;Acc:HGNC:23177]
9828	ARHGEF17	Rho guanine nucleotide exchange factor 17 [Source:HGNC Symbol;Acc:HGNC:21726]
9869	SETDB1	SET domain bifurcated histone lysine methyltransferase 1 [Source:HGNC Symbol;Acc:HGNC:10761]
9894	TELO2	telomere maintenance 2 [Source:HGNC Symbol;Acc:HGNC:29099]
9925	ZBTB5	zinc finger and BTB domain containing 5 [Source:HGNC Symbol;Acc:HGNC:23836]
9933	PUM3	pumilio RNA binding family member 3 [Source:HGNC Symbol;Acc:HGNC:29676]
9987	HNRNPDL	heterogeneous nuclear ribonucleoprotein D like [Source:HGNC Symbol;Acc:HGNC:5037]
9990	SLC12A6	solute carrier family 12 member 6 [Source:HGNC Symbol;Acc:HGNC:10914]
9993	DGCR2	DiGeorge syndrome critical region gene 2 [Source:HGNC Symbol;Acc:HGNC:2845]

## Sheet: KP1-GFP liver colonies in athym
Gene Set Name	# Genes in Gene Set (K)	Description	# Genes in Overlap (k)	k/K	p-value	FDR q-value
HALLMARK_E2F_TARGETS	200	Genes encoding cell cycle related targets of E2F transcription factors.	25	0.125	2.35e-12	1.18e-10
HALLMARK_G2M_CHECKPOINT	200	Genes involved in the G2/M checkpoint, as in progression through the cell division cycle.	23	0.115	9.79e-11	2.45e-09
HALLMARK_MYC_TARGETS_V1	200	A subgroup of genes regulated by MYC - version 1 (v1).	22	0.11	5.88e-10	9.79e-09
HALLMARK_XENOBIOTIC_METABOLISM	200	Genes encoding proteins involved in processing of drugs and other xenobiotics.	19	0.095	9.32e-08	1.17e-06
HALLMARK_OXIDATIVE_PHOSPHORYLATION	200	Genes encoding proteins involved in oxidative phosphorylation.	18	0.09	4.52e-07	4.52e-06
HALLMARK_MTORC1_SIGNALING	200	Genes up-regulated through activation of mTORC1 complex.	16	0.08	8.88e-06	7.18e-05
HALLMARK_FATTY_ACID_METABOLISM	158	Genes encoding proteins involved in metabolism of fatty acids.	14	0.0886	1.01e-05	7.18e-05
HALLMARK_PEROXISOME	104	Genes encoding components of peroxisome.	11	0.1058	1.7e-05	0.000106
HALLMARK_HEME_METABOLISM	200	Genes involved in metabolism of heme (a cofactor consisting of iron and porphyrin) and erythroblast differentiation.	15	0.075	3.58e-05	0.000199
HALLMARK_IL2_STAT5_SIGNALING	200	Genes up-regulated by STAT5 in response to IL2 stimulation.	14	0.07	0.000135	0.000612
HALLMARK_P53_PATHWAY	200	Genes involved in p53 pathways and networks.	14	0.07	0.000135	0.000612
HALLMARK_UNFOLDED_PROTEIN_RESPONSE	113	Genes up-regulated during unfolded protein response, a cellular stress response related to the endoplasmic reticulum.	9	0.0796	0.000828	0.00345
HALLMARK_GLYCOLYSIS	200	Genes encoding proteins involved in glycolysis and gluconeogenesis.	12	0.06	0.00153	0.00546
HALLMARK_INTERFERON_GAMMA_RESPONSE	200	Genes up-regulated in response to IFNG [GeneID=3458].	12	0.06	0.00153	0.00546
HALLMARK_DNA_REPAIR	150	Genes involved in DNA repair.	10	0.0667	0.0017	0.00567
Gene/Gene Set Overlap Matrix
Entrez Gene Id	Gene Symbol	Gene Description	HALLMARK_E2F_TARGETS	HALLMARK_G2M_CHECKPOINT	HALLMARK_MYC_TARGETS_V1	HALLMARK_XENOBIOTIC_METABOLISM	HALLMARK_OXIDATIVE_PHOSPHORYLATION	HALLMARK_MTORC1_SIGNALING	HALLMARK_FATTY_ACID_METABOLISM	HALLMARK_PEROXISOME	HALLMARK_HEME_METABOLISM	HALLMARK_IL2_STAT5_SIGNALING	HALLMARK_P53_PATHWAY	HALLMARK_UNFOLDED_PROTEIN_RESPONSE	HALLMARK_GLYCOLYSIS	HALLMARK_INTERFERON_GAMMA_RESPONSE	HALLMARK_DNA_REPAIR
4171	MCM2	minichromosome maintenance complex component 2 [Source:HGNC Symbol;Acc:HGNC:6944]	HALLMARK_E2F_TARGETS	HALLMARK_G2M_CHECKPOINT	HALLMARK_MYC_TARGETS_V1			HALLMARK_MTORC1_SIGNALING
4174	MCM5	minichromosome maintenance complex component 5 [Source:HGNC Symbol;Acc:HGNC:6948]	HALLMARK_E2F_TARGETS	HALLMARK_G2M_CHECKPOINT	HALLMARK_MYC_TARGETS_V1
3161	HMMR	hyaluronan mediated motility receptor [Source:HGNC Symbol;Acc:HGNC:5012]	HALLMARK_E2F_TARGETS	HALLMARK_G2M_CHECKPOINT											HALLMARK_GLYCOLYSIS
9700	ESPL1	extra spindle pole bodies like 1, separase [Source:HGNC Symbol;Acc:HGNC:16856]	HALLMARK_E2F_TARGETS	HALLMARK_G2M_CHECKPOINT
1033	CDKN3	cyclin dependent kinase inhibitor 3 [Source:HGNC Symbol;Acc:HGNC:1791]	HALLMARK_E2F_TARGETS	HALLMARK_G2M_CHECKPOINT
23594	ORC6	origin recognition complex subunit 6 [Source:HGNC Symbol;Acc:HGNC:17151]	HALLMARK_E2F_TARGETS	HALLMARK_G2M_CHECKPOINT
5426	POLE	DNA polymerase epsilon, catalytic subunit [Source:HGNC Symbol;Acc:HGNC:9177]	HALLMARK_E2F_TARGETS	HALLMARK_G2M_CHECKPOINT
6839	SUV39H1	suppressor of variegation 3-9 homolog 1 [Source:HGNC Symbol;Acc:HGNC:11479]	HALLMARK_E2F_TARGETS	HALLMARK_G2M_CHECKPOINT
10549	PRDX4	peroxiredoxin 4 [Source:HGNC Symbol;Acc:HGNC:17169]	HALLMARK_E2F_TARGETS		HALLMARK_MYC_TARGETS_V1
4999	ORC2	origin recognition complex subunit 2 [Source:HGNC Symbol;Acc:HGNC:8488]	HALLMARK_E2F_TARGETS		HALLMARK_MYC_TARGETS_V1
10797	MTHFD2	methylenetetrahydrofolate dehydrogenase (NADP+ dependent) 2, methenyltetrahydrofolate cyclohydrolase [Source:HGNC Symbol;Acc:HGNC:7434]	HALLMARK_E2F_TARGETS					HALLMARK_MTORC1_SIGNALING						HALLMARK_UNFOLDED_PROTEIN_RESPONSE		HALLMARK_INTERFERON_GAMMA_RESPONSE
7283	TUBG1	tubulin gamma 1 [Source:HGNC Symbol;Acc:HGNC:12417]	HALLMARK_E2F_TARGETS					HALLMARK_MTORC1_SIGNALING
6117	RPA1	replication protein A1 [Source:HGNC Symbol;Acc:HGNC:10289]	HALLMARK_E2F_TARGETS					HALLMARK_MTORC1_SIGNALING
4436	MSH2	mutS homolog 2 [Source:HGNC Symbol;Acc:HGNC:7325]	HALLMARK_E2F_TARGETS							HALLMARK_PEROXISOME
10535	RNASEH2A	ribonuclease H2 subunit A [Source:HGNC Symbol;Acc:HGNC:18518]	HALLMARK_E2F_TARGETS
9238	TBRG4	transforming growth factor beta regulator 4 [Source:HGNC Symbol;Acc:HGNC:17443]	HALLMARK_E2F_TARGETS
10615	SPAG5	sperm associated antigen 5 [Source:HGNC Symbol;Acc:HGNC:13452]	HALLMARK_E2F_TARGETS
11168	PSIP1	PC4 and SFRS1 interacting protein 1 [Source:HGNC Symbol;Acc:HGNC:9527]	HALLMARK_E2F_TARGETS
197335	WDR90	WD repeat domain 90 [Source:HGNC Symbol;Acc:HGNC:26960]	HALLMARK_E2F_TARGETS
29893	PSMC3IP	PSMC3 interacting protein [Source:HGNC Symbol;Acc:HGNC:17928]	HALLMARK_E2F_TARGETS
5511	PPP1R8	protein phosphatase 1 regulatory subunit 8 [Source:HGNC Symbol;Acc:HGNC:9296]	HALLMARK_E2F_TARGETS
55148	UBR7	ubiquitin protein ligase E3 component n-recognin 7 (putative) [Source:HGNC Symbol;Acc:HGNC:20344]	HALLMARK_E2F_TARGETS
55723	ASF1B	anti-silencing function 1B histone chaperone [Source:HGNC Symbol;Acc:HGNC:20996]	HALLMARK_E2F_TARGETS
57405	SPC25	SPC25 component of NDC80 kinetochore complex [Source:HGNC Symbol;Acc:HGNC:24031]	HALLMARK_E2F_TARGETS
8726	EED	embryonic ectoderm development [Source:HGNC Symbol;Acc:HGNC:3188]	HALLMARK_E2F_TARGETS
3192	HNRNPU	heterogeneous nuclear ribonucleoprotein U [Source:HGNC Symbol;Acc:HGNC:5048]		HALLMARK_G2M_CHECKPOINT	HALLMARK_MYC_TARGETS_V1
8454	CUL1	cullin 1 [Source:HGNC Symbol;Acc:HGNC:2551]		HALLMARK_G2M_CHECKPOINT	HALLMARK_MYC_TARGETS_V1
5887	RAD23B	RAD23 homolog B, nucleotide excision repair protein [Source:HGNC Symbol;Acc:HGNC:9813]		HALLMARK_G2M_CHECKPOINT	HALLMARK_MYC_TARGETS_V1
8318	CDC45	cell division cycle 45 [Source:HGNC Symbol;Acc:HGNC:1739]		HALLMARK_G2M_CHECKPOINT	HALLMARK_MYC_TARGETS_V1
899	CCNF	cyclin F [Source:HGNC Symbol;Acc:HGNC:1591]		HALLMARK_G2M_CHECKPOINT				HALLMARK_MTORC1_SIGNALING
387893	KMT5A	lysine methyltransferase 5A [Source:HGNC Symbol;Acc:HGNC:29489]		HALLMARK_G2M_CHECKPOINT					HALLMARK_FATTY_ACID_METABOLISM
1058	CENPA	centromere protein A [Source:HGNC Symbol;Acc:HGNC:1851]		HALLMARK_G2M_CHECKPOINT											HALLMARK_GLYCOLYSIS
7272	TTK	TTK protein kinase [Source:HGNC Symbol;Acc:HGNC:12401]		HALLMARK_G2M_CHECKPOINT
1432	MAPK14	mitogen-activated protein kinase 14 [Source:HGNC Symbol;Acc:HGNC:6876]		HALLMARK_G2M_CHECKPOINT
10036	CHAF1A	chromatin assembly factor 1 subunit A [Source:HGNC Symbol;Acc:HGNC:1910]		HALLMARK_G2M_CHECKPOINT
1841	DTYMK	deoxythymidylate kinase [Source:HGNC Symbol;Acc:HGNC:3061]		HALLMARK_G2M_CHECKPOINT
2176	FANCC	FA complementation group C [Source:HGNC Symbol;Acc:HGNC:3584]		HALLMARK_G2M_CHECKPOINT
4212	MEIS2	Meis homeobox 2 [Source:HGNC Symbol;Acc:HGNC:7001]		HALLMARK_G2M_CHECKPOINT
4957	ODF2	outer dense fiber of sperm tails 2 [Source:HGNC Symbol;Acc:HGNC:8114]		HALLMARK_G2M_CHECKPOINT
8438	RAD54L	RAD54 like [Source:HGNC Symbol;Acc:HGNC:9826]		HALLMARK_G2M_CHECKPOINT
10728	PTGES3	prostaglandin E synthase 3 [Source:HGNC Symbol;Acc:HGNC:16049]			HALLMARK_MYC_TARGETS_V1	HALLMARK_XENOBIOTIC_METABOLISM
3735	KARS	lysyl-tRNA synthetase [Source:HGNC Symbol;Acc:HGNC:6215]			HALLMARK_MYC_TARGETS_V1	HALLMARK_XENOBIOTIC_METABOLISM
6141	RPL18	ribosomal protein L18 [Source:HGNC Symbol;Acc:HGNC:10310]			HALLMARK_MYC_TARGETS_V1								HALLMARK_P53_PATHWAY
10236	HNRNPR	heterogeneous nuclear ribonucleoprotein R [Source:HGNC Symbol;Acc:HGNC:5047]			HALLMARK_MYC_TARGETS_V1
10291	SF3A1	splicing factor 3a subunit 1 [Source:HGNC Symbol;Acc:HGNC:10765]			HALLMARK_MYC_TARGETS_V1
10921	RNPS1	RNA binding protein with serine rich domain 1 [Source:HGNC Symbol;Acc:HGNC:10080]			HALLMARK_MYC_TARGETS_V1
2079	ERH	ERH mRNA splicing and mitosis factor [Source:HGNC Symbol;Acc:HGNC:3447]			HALLMARK_MYC_TARGETS_V1
220988	HNRNPA3	heterogeneous nuclear ribonucleoprotein A3 [Source:HGNC Symbol;Acc:HGNC:24941]			HALLMARK_MYC_TARGETS_V1
3181	HNRNPA2B1	heterogeneous nuclear ribonucleoprotein A2/B1 [Source:HGNC Symbol;Acc:HGNC:5033]			HALLMARK_MYC_TARGETS_V1
51020	HDDC2	HD domain containing 2 [Source:HGNC Symbol;Acc:HGNC:21078]			HALLMARK_MYC_TARGETS_V1
5496	PPM1G	protein phosphatase, Mg2+/Mn2+ dependent 1G [Source:HGNC Symbol;Acc:HGNC:9278]			HALLMARK_MYC_TARGETS_V1
5682	PSMA1	proteasome subunit alpha 1 [Source:HGNC Symbol;Acc:HGNC:9530]			HALLMARK_MYC_TARGETS_V1
5713	PSMD7	proteasome 26S subunit, non-ATPase 7 [Source:HGNC Symbol;Acc:HGNC:9565]			HALLMARK_MYC_TARGETS_V1
6240	RRM1	ribonucleotide reductase catalytic subunit M1 [Source:HGNC Symbol;Acc:HGNC:10451]			HALLMARK_MYC_TARGETS_V1
50	ACO2	aconitase 2 [Source:HGNC Symbol;Acc:HGNC:118]				HALLMARK_XENOBIOTIC_METABOLISM	HALLMARK_OXIDATIVE_PHOSPHORYLATION		HALLMARK_FATTY_ACID_METABOLISM
9663	LPIN2	lipin 2 [Source:HGNC Symbol;Acc:HGNC:14450]				HALLMARK_XENOBIOTIC_METABOLISM					HALLMARK_HEME_METABOLISM
2184	FAH	fumarylacetoacetate hydrolase [Source:HGNC Symbol;Acc:HGNC:3579]				HALLMARK_XENOBIOTIC_METABOLISM						HALLMARK_IL2_STAT5_SIGNALING
191	AHCY	adenosylhomocysteinase [Source:HGNC Symbol;Acc:HGNC:343]				HALLMARK_XENOBIOTIC_METABOLISM						HALLMARK_IL2_STAT5_SIGNALING
8460	TPST1	tyrosylprotein sulfotransferase 1 [Source:HGNC Symbol;Acc:HGNC:12020]				HALLMARK_XENOBIOTIC_METABOLISM									HALLMARK_GLYCOLYSIS
629	CFB	complement factor B [Source:HGNC Symbol;Acc:HGNC:1037]				HALLMARK_XENOBIOTIC_METABOLISM										HALLMARK_INTERFERON_GAMMA_RESPONSE
2643	GCH1	GTP cyclohydrolase 1 [Source:HGNC Symbol;Acc:HGNC:4193]				HALLMARK_XENOBIOTIC_METABOLISM										HALLMARK_INTERFERON_GAMMA_RESPONSE
28959	TMEM176B	transmembrane protein 176B [Source:HGNC Symbol;Acc:HGNC:29596]				HALLMARK_XENOBIOTIC_METABOLISM
5950	RBP4	retinol binding protein 4 [Source:HGNC Symbol;Acc:HGNC:9922]				HALLMARK_XENOBIOTIC_METABOLISM
348	APOE	apolipoprotein E [Source:HGNC Symbol;Acc:HGNC:613]				HALLMARK_XENOBIOTIC_METABOLISM
10857	PGRMC1	progesterone receptor membrane component 1 [Source:HGNC Symbol;Acc:HGNC:16090]				HALLMARK_XENOBIOTIC_METABOLISM
1312	COMT	catechol-O-methyltransferase [Source:HGNC Symbol;Acc:HGNC:2228]				HALLMARK_XENOBIOTIC_METABOLISM
2099	ESR1	estrogen receptor 1 [Source:HGNC Symbol;Acc:HGNC:3467]				HALLMARK_XENOBIOTIC_METABOLISM
29950	SERTAD1	SERTA domain containing 1 [Source:HGNC Symbol;Acc:HGNC:17932]				HALLMARK_XENOBIOTIC_METABOLISM
51380	CSAD	cysteine sulfinic acid decarboxylase [Source:HGNC Symbol;Acc:HGNC:18966]				HALLMARK_XENOBIOTIC_METABOLISM
5730	PTGDS	prostaglandin D2 synthase [Source:HGNC Symbol;Acc:HGNC:9592]				HALLMARK_XENOBIOTIC_METABOLISM
57447	NDRG2	NDRG family member 2 [Source:HGNC Symbol;Acc:HGNC:14460]				HALLMARK_XENOBIOTIC_METABOLISM
3028	HSD17B10	hydroxysteroid 17-beta dehydrogenase 10 [Source:HGNC Symbol;Acc:HGNC:4800]					HALLMARK_OXIDATIVE_PHOSPHORYLATION		HALLMARK_FATTY_ACID_METABOLISM
3032	HADHB	hydroxyacyl-CoA dehydrogenase trifunctional multienzyme complex subunit beta [Source:HGNC Symbol;Acc:HGNC:4803]					HALLMARK_OXIDATIVE_PHOSPHORYLATION		HALLMARK_FATTY_ACID_METABOLISM
3420	IDH3B	isocitrate dehydrogenase 3 (NAD(+)) beta [Source:HGNC Symbol;Acc:HGNC:5385]					HALLMARK_OXIDATIVE_PHOSPHORYLATION		HALLMARK_FATTY_ACID_METABOLISM
37	ACADVL	acyl-CoA dehydrogenase very long chain [Source:HGNC Symbol;Acc:HGNC:92]					HALLMARK_OXIDATIVE_PHOSPHORYLATION		HALLMARK_FATTY_ACID_METABOLISM
8803	SUCLA2	succinate-CoA ligase ADP-forming beta subunit [Source:HGNC Symbol;Acc:HGNC:11448]					HALLMARK_OXIDATIVE_PHOSPHORYLATION		HALLMARK_FATTY_ACID_METABOLISM
3945	LDHB	lactate dehydrogenase B [Source:HGNC Symbol;Acc:HGNC:6541]					HALLMARK_OXIDATIVE_PHOSPHORYLATION						HALLMARK_P53_PATHWAY
80273	GRPEL1	GrpE like 1, mitochondrial [Source:HGNC Symbol;Acc:HGNC:19696]					HALLMARK_OXIDATIVE_PHOSPHORYLATION
1351	COX8A	cytochrome c oxidase subunit 8A [Source:HGNC Symbol;Acc:HGNC:2294]					HALLMARK_OXIDATIVE_PHOSPHORYLATION
1431	CS	citrate synthase [Source:HGNC Symbol;Acc:HGNC:2422]					HALLMARK_OXIDATIVE_PHOSPHORYLATION
593	BCKDHA	branched chain keto acid dehydrogenase E1, alpha polypeptide [Source:HGNC Symbol;Acc:HGNC:986]					HALLMARK_OXIDATIVE_PHOSPHORYLATION
36	ACADSB	acyl-CoA dehydrogenase short/branched chain [Source:HGNC Symbol;Acc:HGNC:91]					HALLMARK_OXIDATIVE_PHOSPHORYLATION
38	ACAT1	acetyl-CoA acetyltransferase 1 [Source:HGNC Symbol;Acc:HGNC:93]					HALLMARK_OXIDATIVE_PHOSPHORYLATION
4695	NDUFA2	NADH:ubiquinone oxidoreductase subunit A2 [Source:HGNC Symbol;Acc:HGNC:7685]					HALLMARK_OXIDATIVE_PHOSPHORYLATION
4697	NDUFA4	NDUFA4 mitochondrial complex associated [Source:HGNC Symbol;Acc:HGNC:7687]					HALLMARK_OXIDATIVE_PHOSPHORYLATION
4723	NDUFV1	NADH:ubiquinone oxidoreductase core subunit V1 [Source:HGNC Symbol;Acc:HGNC:7716]					HALLMARK_OXIDATIVE_PHOSPHORYLATION
514	ATP5F1E	ATP synthase F1 subunit epsilon [Source:HGNC Symbol;Acc:HGNC:838]					HALLMARK_OXIDATIVE_PHOSPHORYLATION
7388	UQCRH	ubiquinol-cytochrome c reductase hinge protein [Source:HGNC Symbol;Acc:HGNC:12590]					HALLMARK_OXIDATIVE_PHOSPHORYLATION
23657	SLC7A11	solute carrier family 7 member 11 [Source:HGNC Symbol;Acc:HGNC:11059]						HALLMARK_MTORC1_SIGNALING			HALLMARK_HEME_METABOLISM		HALLMARK_P53_PATHWAY
3145	HMBS	hydroxymethylbilane synthase [Source:HGNC Symbol;Acc:HGNC:4982]						HALLMARK_MTORC1_SIGNALING			HALLMARK_HEME_METABOLISM
26471	NUPR1	nuclear protein 1, transcriptional regulator [Source:HGNC Symbol;Acc:HGNC:29990]						HALLMARK_MTORC1_SIGNALING					HALLMARK_P53_PATHWAY
900	CCNG1	cyclin G1 [Source:HGNC Symbol;Acc:HGNC:1592]						HALLMARK_MTORC1_SIGNALING					HALLMARK_P53_PATHWAY
2023	ENO1	enolase 1 [Source:HGNC Symbol;Acc:HGNC:3350]						HALLMARK_MTORC1_SIGNALING							HALLMARK_GLYCOLYSIS
5684	PSMA3	proteasome subunit alpha 3 [Source:HGNC Symbol;Acc:HGNC:9532]						HALLMARK_MTORC1_SIGNALING								HALLMARK_INTERFERON_GAMMA_RESPONSE
80777	CYB5B	cytochrome b5 type B [Source:HGNC Symbol;Acc:HGNC:24374]						HALLMARK_MTORC1_SIGNALING
6016	RIT1	Ras like without CAAX 1 [Source:HGNC Symbol;Acc:HGNC:10023]						HALLMARK_MTORC1_SIGNALING
134429	STARD4	StAR related lipid transfer domain containing 4 [Source:HGNC Symbol;Acc:HGNC:18058]						HALLMARK_MTORC1_SIGNALING
3308	HSPA4	heat shock protein family A (Hsp70) member 4 [Source:HGNC Symbol;Acc:HGNC:5237]						HALLMARK_MTORC1_SIGNALING
5464	PPA1	pyrophosphatase (inorganic) 1 [Source:HGNC Symbol;Acc:HGNC:9226]						HALLMARK_MTORC1_SIGNALING
7533	YWHAH	tyrosine 3-monooxygenase/tryptophan 5-monooxygenase activation protein eta [Source:HGNC Symbol;Acc:HGNC:12853]							HALLMARK_FATTY_ACID_METABOLISM	HALLMARK_PEROXISOME
23417	MLYCD	malonyl-CoA decarboxylase [Source:HGNC Symbol;Acc:HGNC:7150]							HALLMARK_FATTY_ACID_METABOLISM	HALLMARK_PEROXISOME
3295	HSD17B4	hydroxysteroid 17-beta dehydrogenase 4 [Source:HGNC Symbol;Acc:HGNC:5213]							HALLMARK_FATTY_ACID_METABOLISM	HALLMARK_PEROXISOME
51703	ACSL5	acyl-CoA synthetase long chain family member 5 [Source:HGNC Symbol;Acc:HGNC:16526]							HALLMARK_FATTY_ACID_METABOLISM	HALLMARK_PEROXISOME
2027	ENO3	enolase 3 [Source:HGNC Symbol;Acc:HGNC:3354]							HALLMARK_FATTY_ACID_METABOLISM			HALLMARK_IL2_STAT5_SIGNALING
4282	MIF	macrophage migration inhibitory factor [Source:HGNC Symbol;Acc:HGNC:7097]							HALLMARK_FATTY_ACID_METABOLISM						HALLMARK_GLYCOLYSIS
23173	METAP1	methionyl aminopeptidase 1 [Source:HGNC Symbol;Acc:HGNC:15789]							HALLMARK_FATTY_ACID_METABOLISM
6648	SOD2	superoxide dismutase 2 [Source:HGNC Symbol;Acc:HGNC:11180]								HALLMARK_PEROXISOME						HALLMARK_INTERFERON_GAMMA_RESPONSE
2224	FDPS	farnesyl diphosphate synthase [Source:HGNC Symbol;Acc:HGNC:3631]								HALLMARK_PEROXISOME
83752	LONP2	lon peptidase 2, peroxisomal [Source:HGNC Symbol;Acc:HGNC:20598]								HALLMARK_PEROXISOME
6833	ABCC8	ATP binding cassette subfamily C member 8 [Source:HGNC Symbol;Acc:HGNC:59]								HALLMARK_PEROXISOME
23457	ABCB9	ATP binding cassette subfamily B member 9 [Source:HGNC Symbol;Acc:HGNC:50]								HALLMARK_PEROXISOME
390916	NUDT19	nudix hydrolase 19 [Source:HGNC Symbol;Acc:HGNC:32036]								HALLMARK_PEROXISOME
1508	CTSB	cathepsin B [Source:HGNC Symbol;Acc:HGNC:2527]									HALLMARK_HEME_METABOLISM
23052	ENDOD1	endonuclease domain containing 1 [Source:HGNC Symbol;Acc:HGNC:29129]									HALLMARK_HEME_METABOLISM
119	ADD2	adducin 2 [Source:HGNC Symbol;Acc:HGNC:244]									HALLMARK_HEME_METABOLISM
129642	MBOAT2	membrane bound O-acyltransferase domain containing 2 [Source:HGNC Symbol;Acc:HGNC:25193]									HALLMARK_HEME_METABOLISM
25793	FBXO7	F-box protein 7 [Source:HGNC Symbol;Acc:HGNC:13586]									HALLMARK_HEME_METABOLISM
3029	HAGH	hydroxyacylglutathione hydrolase [Source:HGNC Symbol;Acc:HGNC:4805]									HALLMARK_HEME_METABOLISM
51573	GDE1	glycerophosphodiester phosphodiesterase 1 [Source:HGNC Symbol;Acc:HGNC:29644]									HALLMARK_HEME_METABOLISM
5498	PPOX	protoporphyrinogen oxidase [Source:HGNC Symbol;Acc:HGNC:9280]									HALLMARK_HEME_METABOLISM
55532	SLC30A10	solute carrier family 30 member 10 [Source:HGNC Symbol;Acc:HGNC:25355]									HALLMARK_HEME_METABOLISM
56674	TMEM9B	TMEM9 domain family member B [Source:HGNC Symbol;Acc:HGNC:1168]									HALLMARK_HEME_METABOLISM
79269	DCAF10	DDB1 and CUL4 associated factor 10 [Source:HGNC Symbol;Acc:HGNC:23686]									HALLMARK_HEME_METABOLISM
9258	MFHAS1	malignant fibrous histiocytoma amplified sequence 1 [Source:HGNC Symbol;Acc:HGNC:16982]									HALLMARK_HEME_METABOLISM
10397	NDRG1	N-myc downstream regulated 1 [Source:HGNC Symbol;Acc:HGNC:7679]										HALLMARK_IL2_STAT5_SIGNALING	HALLMARK_P53_PATHWAY
8829	NRP1	neuropilin 1 [Source:HGNC Symbol;Acc:HGNC:8004]										HALLMARK_IL2_STAT5_SIGNALING
8611	PLPP1	phospholipid phosphatase 1 [Source:HGNC Symbol;Acc:HGNC:9228]										HALLMARK_IL2_STAT5_SIGNALING
7052	TGM2	transglutaminase 2 [Source:HGNC Symbol;Acc:HGNC:11778]										HALLMARK_IL2_STAT5_SIGNALING
11230	PRAF2	PRA1 domain family member 2 [Source:HGNC Symbol;Acc:HGNC:28911]										HALLMARK_IL2_STAT5_SIGNALING
177	AGER	advanced glycosylation end-product specific receptor [Source:HGNC Symbol;Acc:HGNC:320]										HALLMARK_IL2_STAT5_SIGNALING
221143	EEF1AKMT1	EEF1A lysine methyltransferase 1 [Source:HGNC Symbol;Acc:HGNC:27351]										HALLMARK_IL2_STAT5_SIGNALING
51651	PTRH2	peptidyl-tRNA hydrolase 2 [Source:HGNC Symbol;Acc:HGNC:24265]										HALLMARK_IL2_STAT5_SIGNALING
5269	SERPINB6	serpin family B member 6 [Source:HGNC Symbol;Acc:HGNC:8950]										HALLMARK_IL2_STAT5_SIGNALING
5745	PTH1R	parathyroid hormone 1 receptor [Source:HGNC Symbol;Acc:HGNC:9608]										HALLMARK_IL2_STAT5_SIGNALING
8835	SOCS2	suppressor of cytokine signaling 2 [Source:HGNC Symbol;Acc:HGNC:19382]										HALLMARK_IL2_STAT5_SIGNALING
26355	FAM162A	family with sequence similarity 162 member A [Source:HGNC Symbol;Acc:HGNC:17865]											HALLMARK_P53_PATHWAY		HALLMARK_GLYCOLYSIS
8673	VAMP8	vesicle associated membrane protein 8 [Source:HGNC Symbol;Acc:HGNC:12647]											HALLMARK_P53_PATHWAY			HALLMARK_INTERFERON_GAMMA_RESPONSE
1509	CTSD	cathepsin D [Source:HGNC Symbol;Acc:HGNC:2529]											HALLMARK_P53_PATHWAY
5154	PDGFA	platelet derived growth factor subunit A [Source:HGNC Symbol;Acc:HGNC:8799]											HALLMARK_P53_PATHWAY
4193	MDM2	MDM2 proto-oncogene [Source:HGNC Symbol;Acc:HGNC:6973]											HALLMARK_P53_PATHWAY
49856	WRAP73	WD repeat containing, antisense to TP73 [Source:HGNC Symbol;Acc:HGNC:12759]											HALLMARK_P53_PATHWAY
5564	PRKAB1	protein kinase AMP-activated non-catalytic subunit beta 1 [Source:HGNC Symbol;Acc:HGNC:9378]											HALLMARK_P53_PATHWAY
92815	HIST3H2A	histone cluster 3 H2A [Source:HGNC Symbol;Acc:HGNC:20507]											HALLMARK_P53_PATHWAY
7280	TUBB2A	tubulin beta 2A class IIa [Source:HGNC Symbol;Acc:HGNC:12412]												HALLMARK_UNFOLDED_PROTEIN_RESPONSE
10775	POP4	POP4 homolog, ribonuclease P/MRP subunit [Source:HGNC Symbol;Acc:HGNC:30081]												HALLMARK_UNFOLDED_PROTEIN_RESPONSE
23517	MTREX	Mtr4 exosome RNA helicase [Source:HGNC Symbol;Acc:HGNC:18734]												HALLMARK_UNFOLDED_PROTEIN_RESPONSE
23644	EDC4	enhancer of mRNA decapping 4 [Source:HGNC Symbol;Acc:HGNC:17157]												HALLMARK_UNFOLDED_PROTEIN_RESPONSE
30827	CXXC1	CXXC finger protein 1 [Source:HGNC Symbol;Acc:HGNC:24343]												HALLMARK_UNFOLDED_PROTEIN_RESPONSE
4848	AC092881.1	CCR4-NOT transcription complex subunit 2 [Source:NCBI gene;Acc:4848]												HALLMARK_UNFOLDED_PROTEIN_RESPONSE
55153	SDAD1	SDA1 domain containing 1 [Source:HGNC Symbol;Acc:HGNC:25537]												HALLMARK_UNFOLDED_PROTEIN_RESPONSE
55770	EXOC2	exocyst complex component 2 [Source:HGNC Symbol;Acc:HGNC:24968]												HALLMARK_UNFOLDED_PROTEIN_RESPONSE
7295	TXN	thioredoxin [Source:HGNC Symbol;Acc:HGNC:12435]													HALLMARK_GLYCOLYSIS
2582	GALE	UDP-galactose-4-epimerase [Source:HGNC Symbol;Acc:HGNC:4116]													HALLMARK_GLYCOLYSIS
229	ALDOB	aldolase, fructose-bisphosphate B [Source:HGNC Symbol;Acc:HGNC:417]													HALLMARK_GLYCOLYSIS
2990	GUSB	glucuronidase beta [Source:HGNC Symbol;Acc:HGNC:4696]													HALLMARK_GLYCOLYSIS
4351	MPI	mannose phosphate isomerase [Source:HGNC Symbol;Acc:HGNC:7216]													HALLMARK_GLYCOLYSIS
79586	CHPF	chondroitin polymerizing factor [Source:HGNC Symbol;Acc:HGNC:24291]													HALLMARK_GLYCOLYSIS
972	CD74	CD74 molecule [Source:HGNC Symbol;Acc:HGNC:1697]														HALLMARK_INTERFERON_GAMMA_RESPONSE
11054	OGFR	opioid growth factor receptor [Source:HGNC Symbol;Acc:HGNC:15768]														HALLMARK_INTERFERON_GAMMA_RESPONSE
23070	CMTR1	cap methyltransferase 1 [Source:HGNC Symbol;Acc:HGNC:21077]														HALLMARK_INTERFERON_GAMMA_RESPONSE
5771	PTPN2	protein tyrosine phosphatase non-receptor type 2 [Source:HGNC Symbol;Acc:HGNC:9650]														HALLMARK_INTERFERON_GAMMA_RESPONSE
196410	METTL7B	methyltransferase like 7B [Source:HGNC Symbol;Acc:HGNC:28276]														HALLMARK_INTERFERON_GAMMA_RESPONSE
9688	NUP93	nucleoporin 93 [Source:HGNC Symbol;Acc:HGNC:28958]														HALLMARK_INTERFERON_GAMMA_RESPONSE
10623	POLR3C	RNA polymerase III subunit C [Source:HGNC Symbol;Acc:HGNC:30076]															HALLMARK_DNA_REPAIR
27343	POLL	DNA polymerase lambda [Source:HGNC Symbol;Acc:HGNC:9184]															HALLMARK_DNA_REPAIR
2959	GTF2B	general transcription factor IIB [Source:HGNC Symbol;Acc:HGNC:4648]															HALLMARK_DNA_REPAIR
3704	ITPA	inosine triphosphatase [Source:HGNC Symbol;Acc:HGNC:6176]															HALLMARK_DNA_REPAIR
4350	MPG	N-methylpurine DNA glycosylase [Source:HGNC Symbol;Acc:HGNC:7211]															HALLMARK_DNA_REPAIR
4833	NME4	NME/NM23 nucleoside diphosphate kinase 4 [Source:HGNC Symbol;Acc:HGNC:7852]															HALLMARK_DNA_REPAIR
51164	DCTN4	dynactin subunit 4 [Source:HGNC Symbol;Acc:HGNC:15518]															HALLMARK_DNA_REPAIR
6880	TAF9	TATA-box binding protein associated factor 9 [Source:HGNC Symbol;Acc:HGNC:11542]															HALLMARK_DNA_REPAIR
8731	RNMT	RNA guanine-7 methyltransferase [Source:HGNC Symbol;Acc:HGNC:10075]															HALLMARK_DNA_REPAIR
9013	TAF1C	TATA-box binding protein associated factor, RNA polymerase I subunit C [Source:HGNC Symbol;Acc:HGNC:11534]															HALLMARK_DNA_REPAIR
1032	CDKN2D	cyclin dependent kinase inhibitor 2D [Source:HGNC Symbol;Acc:HGNC:1790]
4155	MBP	myelin basic protein [Source:HGNC Symbol;Acc:HGNC:6925]
12	SERPINA3	serpin family A member 3 [Source:HGNC Symbol;Acc:HGNC:16]
5121	PCP4	Purkinje cell protein 4 [Source:HGNC Symbol;Acc:HGNC:8742]
23136	EPB41L3	erythrocyte membrane protein band 4.1 like 3 [Source:HGNC Symbol;Acc:HGNC:3380]
51012	PRELID3B	PRELI domain containing 3B [Source:HGNC Symbol;Acc:HGNC:15892]
5178	PEG3	paternally expressed 3 [Source:HGNC Symbol;Acc:HGNC:8826]
5284	PIGR	polymeric immunoglobulin receptor [Source:HGNC Symbol;Acc:HGNC:8968]
9949	AMMECR1	Alport syndrome, mental retardation, midface hypoplasia and elliptocytosis chromosomal region gene 1 [Source:HGNC Symbol;Acc:HGNC:467]
6711	SPTBN1	spectrin beta, non-erythrocytic 1 [Source:HGNC Symbol;Acc:HGNC:11275]
6093	ROCK1	Rho associated coiled-coil containing protein kinase 1 [Source:HGNC Symbol;Acc:HGNC:10251]
10300	KATNB1	katanin regulatory subunit B1 [Source:HGNC Symbol;Acc:HGNC:6217]
2017	CTTN	cortactin [Source:HGNC Symbol;Acc:HGNC:3338]
4650	MYO9B	myosin IXB [Source:HGNC Symbol;Acc:HGNC:7609]
55835	CENPJ	centromere protein J [Source:HGNC Symbol;Acc:HGNC:17272]
6249	CLIP1	CAP-Gly domain containing linker protein 1 [Source:HGNC Symbol;Acc:HGNC:10461]
9702	CEP57	centrosomal protein 57 [Source:HGNC Symbol;Acc:HGNC:30794]
11194	ABCB8	ATP binding cassette subfamily B member 8 [Source:HGNC Symbol;Acc:HGNC:49]
7086	TKT	transketolase [Source:HGNC Symbol;Acc:HGNC:11834]
83871	RAB34	RAB34, member RAS oncogene family [Source:HGNC Symbol;Acc:HGNC:16519]
10398	MYL9	myosin light chain 9 [Source:HGNC Symbol;Acc:HGNC:15754]
140885	SIRPA	signal regulatory protein alpha [Source:HGNC Symbol;Acc:HGNC:9662]
55742	PARVA	parvin alpha [Source:HGNC Symbol;Acc:HGNC:14652]
57863	CADM3	cell adhesion molecule 3 [Source:HGNC Symbol;Acc:HGNC:17601]
5819	NECTIN2	nectin cell adhesion molecule 2 [Source:HGNC Symbol;Acc:HGNC:9707]
60	ACTB	actin beta [Source:HGNC Symbol;Acc:HGNC:132]
7216	TRO	trophinin [Source:HGNC Symbol;Acc:HGNC:12326]
5265	SERPINA1	serpin family A member 1 [Source:HGNC Symbol;Acc:HGNC:8941]
2335	FN1	fibronectin 1 [Source:HGNC Symbol;Acc:HGNC:3778]
842	CASP9	caspase 9 [Source:HGNC Symbol;Acc:HGNC:1511]
2155	F7	coagulation factor VII [Source:HGNC Symbol;Acc:HGNC:3544]
30818	KCNIP3	potassium voltage-gated channel interacting protein 3 [Source:HGNC Symbol;Acc:HGNC:15523]
337	APOA4	apolipoprotein A4 [Source:HGNC Symbol;Acc:HGNC:602]
9097	USP14	ubiquitin specific peptidase 14 [Source:HGNC Symbol;Acc:HGNC:12612]
3572	IL6ST	interleukin 6 signal transducer [Source:HGNC Symbol;Acc:HGNC:6021]
4232	MEST	mesoderm specific transcript [Source:HGNC Symbol;Acc:HGNC:7028]
573	BAG1	BCL2 associated athanogene 1 [Source:HGNC Symbol;Acc:HGNC:937]
7134	TNNC1	troponin C1, slow skeletal and cardiac type [Source:HGNC Symbol;Acc:HGNC:11943]
2852	GPER1	G protein-coupled estrogen receptor 1 [Source:HGNC Symbol;Acc:HGNC:4485]
490	ATP2B1	ATPase plasma membrane Ca2+ transporting 1 [Source:HGNC Symbol;Acc:HGNC:814]
273	AMPH	amphiphysin [Source:HGNC Symbol;Acc:HGNC:471]
4052	LTBP1	latent transforming growth factor beta binding protein 1 [Source:HGNC Symbol;Acc:HGNC:6714]
4131	MAP1B	microtubule associated protein 1B [Source:HGNC Symbol;Acc:HGNC:6836]
5607	MAP2K5	mitogen-activated protein kinase kinase 5 [Source:HGNC Symbol;Acc:HGNC:6845]
6334	SCN8A	sodium voltage-gated channel alpha subunit 8 [Source:HGNC Symbol;Acc:HGNC:10596]
2907	GRINA	glutamate ionotropic receptor NMDA type subunit associated protein 1 [Source:HGNC Symbol;Acc:HGNC:4589]
5873	RAB27A	RAB27A, member RAS oncogene family [Source:HGNC Symbol;Acc:HGNC:9766]
6885	MAP3K7	mitogen-activated protein kinase kinase kinase 7 [Source:HGNC Symbol;Acc:HGNC:6859]
2339	FNTA	farnesyltransferase, CAAX box, alpha [Source:HGNC Symbol;Acc:HGNC:3782]
5494	PPM1A	protein phosphatase, Mg2+/Mn2+ dependent 1A [Source:HGNC Symbol;Acc:HGNC:9275]
7018	TF	transferrin [Source:HGNC Symbol;Acc:HGNC:11740]
733	C8G	complement C8 gamma chain [Source:HGNC Symbol;Acc:HGNC:1354]
2193	FARSA	phenylalanyl-tRNA synthetase subunit alpha [Source:HGNC Symbol;Acc:HGNC:3592]
79050	NOC4L	nucleolar complex associated 4 homolog [Source:HGNC Symbol;Acc:HGNC:28461]
9620	CELSR1	cadherin EGF LAG seven-pass G-type receptor 1 [Source:HGNC Symbol;Acc:HGNC:1850]
1400	CRMP1	collapsin response mediator protein 1 [Source:HGNC Symbol;Acc:HGNC:2365]
83666	PARP9	poly(ADP-ribose) polymerase family member 9 [Source:HGNC Symbol;Acc:HGNC:24118]
7163	TPD52	tumor protein D52 [Source:HGNC Symbol;Acc:HGNC:12005]
10627	MYL12A	myosin light chain 12A [Source:HGNC Symbol;Acc:HGNC:16701]
54407	SLC38A2	solute carrier family 38 member 2 [Source:HGNC Symbol;Acc:HGNC:13448]
11010	GLIPR1	GLI pathogenesis related 1 [Source:HGNC Symbol;Acc:HGNC:17001]
64175	P3H1	prolyl 3-hydroxylase 1 [Source:HGNC Symbol;Acc:HGNC:19316]
7171	TPM4	tropomyosin 4 [Source:HGNC Symbol;Acc:HGNC:12013]
813	CALU	calumenin [Source:HGNC Symbol;Acc:HGNC:1458]
65055	REEP1	receptor accessory protein 1 [Source:HGNC Symbol;Acc:HGNC:25786]
23030	KDM4B	lysine demethylase 4B [Source:HGNC Symbol;Acc:HGNC:29136]
55686	MREG	melanoregulin [Source:HGNC Symbol;Acc:HGNC:25478]
11156	PTP4A3	protein tyrosine phosphatase 4A3 [Source:HGNC Symbol;Acc:HGNC:9636]
2314	FLII	FLII actin remodeling protein [Source:HGNC Symbol;Acc:HGNC:3750]
23397	NCAPH	non-SMC condensin I complex subunit H [Source:HGNC Symbol;Acc:HGNC:1112]
29118	DDX25	DEAD-box helicase 25 [Source:HGNC Symbol;Acc:HGNC:18698]
54760	PCSK4	proprotein convertase subtilisin/kexin type 4 [Source:HGNC Symbol;Acc:HGNC:8746]
9489	PGS1	phosphatidylglycerophosphate synthase 1 [Source:HGNC Symbol;Acc:HGNC:30029]
58191	CXCL16	C-X-C motif chemokine ligand 16 [Source:HGNC Symbol;Acc:HGNC:16642]
2638	GC	GC vitamin D binding protein [Source:HGNC Symbol;Acc:HGNC:4187]
4055	AC005840.1	lymphotoxin beta receptor [Source:NCBI gene;Acc:4055]
94	ACVRL1	activin A receptor like type 1 [Source:HGNC Symbol;Acc:HGNC:175]
5970	RELA	RELA proto-oncogene, NF-kB subunit [Source:HGNC Symbol;Acc:HGNC:9955]
56616	DIABLO	diablo IAP-binding mitochondrial protein [Source:HGNC Symbol;Acc:HGNC:21528]
1827	RCAN1	regulator of calcineurin 1 [Source:HGNC Symbol;Acc:HGNC:3040]
10094	ARPC3	actin related protein 2/3 complex subunit 3 [Source:HGNC Symbol;Acc:HGNC:706]
5599	MAPK8	mitogen-activated protein kinase 8 [Source:HGNC Symbol;Acc:HGNC:6881]
6726	SRP9	signal recognition particle 9 [Source:HGNC Symbol;Acc:HGNC:11304]
79885	HDAC11	histone deacetylase 11 [Source:HGNC Symbol;Acc:HGNC:19086]
51614	ERGIC3	ERGIC and golgi 3 [Source:HGNC Symbol;Acc:HGNC:15927]
6456	SH3GL2	SH3 domain containing GRB2 like 2, endophilin A1 [Source:HGNC Symbol;Acc:HGNC:10831]
9607	CARTPT	CART prepropeptide [Source:HGNC Symbol;Acc:HGNC:24323]
23031	MAST3	microtubule associated serine/threonine kinase 3 [Source:HGNC Symbol;Acc:HGNC:19036]
3750	KCND1	potassium voltage-gated channel subfamily D member 1 [Source:HGNC Symbol;Acc:HGNC:6237]
5071	PRKN	parkin RBR E3 ubiquitin protein ligase [Source:HGNC Symbol;Acc:HGNC:8607]
55315	SLC29A3	solute carrier family 29 member 3 [Source:HGNC Symbol;Acc:HGNC:23096]
146760	RTN4RL1	reticulon 4 receptor like 1 [Source:HGNC Symbol;Acc:HGNC:21329]
10011	SRA1	steroid receptor RNA activator 1 [Source:HGNC Symbol;Acc:HGNC:11281]
100134934	TEN1	TEN1 subunit of CST complex [Source:HGNC Symbol;Acc:HGNC:37242]
10026	PIGK	phosphatidylinositol glycan anchor biosynthesis class K [Source:HGNC Symbol;Acc:HGNC:8965]
100303453	TSNAX-DISC1	TSNAX-DISC1 readthrough (NMD candidate) [Source:HGNC Symbol;Acc:HGNC:49177]
10049	DNAJB6	DnaJ heat shock protein family (Hsp40) member B6 [Source:HGNC Symbol;Acc:HGNC:14888]
10082	GPC6	glypican 6 [Source:HGNC Symbol;Acc:HGNC:4454]
100861412	FSBP	fibrinogen silencer binding protein [Source:HGNC Symbol;Acc:HGNC:43653]
10138	YAF2	YY1 associated factor 2 [Source:HGNC Symbol;Acc:HGNC:17363]
10184	LHFPL2	LHFPL tetraspan subfamily member 2 [Source:HGNC Symbol;Acc:HGNC:6588]
1020	CDK5	cyclin dependent kinase 5 [Source:HGNC Symbol;Acc:HGNC:1774]
10201	NME6	NME/NM23 nucleoside diphosphate kinase 6 [Source:HGNC Symbol;Acc:HGNC:20567]
10204	NUTF2	nuclear transport factor 2 [Source:HGNC Symbol;Acc:HGNC:13722]
10211	FLOT1	flotillin 1 [Source:HGNC Symbol;Acc:HGNC:3757]
10229	COQ7	coenzyme Q7, hydroxylase [Source:HGNC Symbol;Acc:HGNC:2244]
10283	CWC27	CWC27 spliceosome associated protein homolog [Source:HGNC Symbol;Acc:HGNC:10664]
10284	SAP18	Sin3A associated protein 18 [Source:HGNC Symbol;Acc:HGNC:10530]
10314	LANCL1	LanC like 1 [Source:HGNC Symbol;Acc:HGNC:6508]
10336	PCGF3	polycomb group ring finger 3 [Source:HGNC Symbol;Acc:HGNC:10066]
10347	ABCA7	ATP binding cassette subfamily A member 7 [Source:HGNC Symbol;Acc:HGNC:37]
10454	TAB1	TGF-beta activated kinase 1 (MAP3K7) binding protein 1 [Source:HGNC Symbol;Acc:HGNC:18157]
10459	MAD2L2	mitotic arrest deficient 2 like 2 [Source:HGNC Symbol;Acc:HGNC:6764]
10469	TIMM44	translocase of inner mitochondrial membrane 44 [Source:HGNC Symbol;Acc:HGNC:17316]
10491	CRTAP	cartilage associated protein [Source:HGNC Symbol;Acc:HGNC:2379]
10523	CHERP	calcium homeostasis endoplasmic reticulum protein [Source:HGNC Symbol;Acc:HGNC:16930]
10539	GLRX3	glutaredoxin 3 [Source:HGNC Symbol;Acc:HGNC:15987]
10559	SLC35A1	solute carrier family 35 member A1 [Source:HGNC Symbol;Acc:HGNC:11021]
10598	AHSA1	activator of HSP90 ATPase activity 1 [Source:HGNC Symbol;Acc:HGNC:1189]
10607	TBL3	transducin beta like 3 [Source:HGNC Symbol;Acc:HGNC:11587]
10669	CGREF1	cell growth regulator with EF-hand domain 1 [Source:HGNC Symbol;Acc:HGNC:16962]
10671	DCTN6	dynactin subunit 6 [Source:HGNC Symbol;Acc:HGNC:16964]
10735	STAG2	stromal antigen 2 [Source:HGNC Symbol;Acc:HGNC:11355]
10807	ENTR1	endosome associated trafficking regulator 1 [Source:HGNC Symbol;Acc:HGNC:10667]
10827	FAM114A2	family with sequence similarity 114 member A2 [Source:HGNC Symbol;Acc:HGNC:1333]
10899	JTB	jumping translocation breakpoint [Source:HGNC Symbol;Acc:HGNC:6201]
10902	BRD8	bromodomain containing 8 [Source:HGNC Symbol;Acc:HGNC:19874]
10916	MAGED2	MAGE family member D2 [Source:HGNC Symbol;Acc:HGNC:16353]
10920	COPS8	COP9 signalosome subunit 8 [Source:HGNC Symbol;Acc:HGNC:24335]
10923	SUB1	SUB1 homolog, transcriptional regulator [Source:HGNC Symbol;Acc:HGNC:19985]
11014	KDELR2	KDEL endoplasmic reticulum protein retention receptor 2 [Source:HGNC Symbol;Acc:HGNC:6305]
11022	TDRKH	tudor and KH domain containing [Source:HGNC Symbol;Acc:HGNC:11713]
11097	NUPL2	nucleoporin like 2 [Source:HGNC Symbol;Acc:HGNC:17010]
11102	RPP14	ribonuclease P/MRP subunit p14 [Source:HGNC Symbol;Acc:HGNC:30327]
11123	RCAN3	RCAN family member 3 [Source:HGNC Symbol;Acc:HGNC:3042]
1114	CHGB	chromogranin B [Source:HGNC Symbol;Acc:HGNC:1930]
11177	BAZ1A	bromodomain adjacent to zinc finger domain 1A [Source:HGNC Symbol;Acc:HGNC:960]
11284	PNKP	polynucleotide kinase 3'-phosphatase [Source:HGNC Symbol;Acc:HGNC:9154]
113130	CDCA5	cell division cycle associated 5 [Source:HGNC Symbol;Acc:HGNC:14626]
114781	BTBD9	BTB domain containing 9 [Source:HGNC Symbol;Acc:HGNC:21228]
114790	STK11IP	serine/threonine kinase 11 interacting protein [Source:HGNC Symbol;Acc:HGNC:19184]
114822	RHPN1	rhophilin Rho GTPase binding protein 1 [Source:HGNC Symbol;Acc:HGNC:19973]
114880	OSBPL6	oxysterol binding protein like 6 [Source:HGNC Symbol;Acc:HGNC:16388]
114987	WDR31	WD repeat domain 31 [Source:HGNC Symbol;Acc:HGNC:21421]
115098	CCDC124	coiled-coil domain containing 124 [Source:HGNC Symbol;Acc:HGNC:25171]
115286	SLC25A26	solute carrier family 25 member 26 [Source:HGNC Symbol;Acc:HGNC:20661]
116844	LRG1	leucine rich alpha-2-glycoprotein 1 [Source:HGNC Symbol;Acc:HGNC:29480]
116988	AGAP3	ArfGAP with GTPase domain, ankyrin repeat and PH domain 3 [Source:HGNC Symbol;Acc:HGNC:16923]
117143	TADA1	transcriptional adaptor 1 [Source:HGNC Symbol;Acc:HGNC:30631]
118426	BORCS5	BLOC-1 related complex subunit 5 [Source:HGNC Symbol;Acc:HGNC:17950]
1198	CLK3	CDC like kinase 3 [Source:HGNC Symbol;Acc:HGNC:2071]
121053	C12orf45	chromosome 12 open reading frame 45 [Source:HGNC Symbol;Acc:HGNC:28628]
121260	SLC15A4	solute carrier family 15 member 4 [Source:HGNC Symbol;Acc:HGNC:23090]
123096	SLC25A29	solute carrier family 25 member 29 [Source:HGNC Symbol;Acc:HGNC:20116]
123720	WHAMM	WASP homolog associated with actin, golgi membranes and microtubules [Source:HGNC Symbol;Acc:HGNC:30493]
123803	NTAN1	N-terminal asparagine amidase [Source:HGNC Symbol;Acc:HGNC:29909]
123872	DNAAF1	dynein axonemal assembly factor 1 [Source:HGNC Symbol;Acc:HGNC:30539]
124944	C17orf49	chromosome 17 open reading frame 49 [Source:HGNC Symbol;Acc:HGNC:28737]
126282	TNFAIP8L1	TNF alpha induced protein 8 like 1 [Source:HGNC Symbol;Acc:HGNC:28279]
127253	TYW3	tRNA-yW synthesizing protein 3 homolog [Source:HGNC Symbol;Acc:HGNC:24757]
127733	UBXN10	UBX domain protein 10 [Source:HGNC Symbol;Acc:HGNC:26354]
128977	C22orf39	chromosome 22 open reading frame 39 [Source:HGNC Symbol;Acc:HGNC:27012]
129401	NUP35	nucleoporin 35 [Source:HGNC Symbol;Acc:HGNC:29797]
131965	METTL6	methyltransferase like 6 [Source:HGNC Symbol;Acc:HGNC:28343]
132160	PPM1M	protein phosphatase, Mg2+/Mn2+ dependent 1M [Source:HGNC Symbol;Acc:HGNC:26506]
134359	POC5	POC5 centriolar protein [Source:HGNC Symbol;Acc:HGNC:26658]
1385	CREB1	cAMP responsive element binding protein 1 [Source:HGNC Symbol;Acc:HGNC:2345]
139322	APOOL	apolipoprotein O like [Source:HGNC Symbol;Acc:HGNC:24009]
139728	PNCK	pregnancy up-regulated nonubiquitous CaM kinase [Source:HGNC Symbol;Acc:HGNC:13415]
140700	SAMD10	sterile alpha motif domain containing 10 [Source:HGNC Symbol;Acc:HGNC:16129]
140739	UBE2F	ubiquitin conjugating enzyme E2 F (putative) [Source:HGNC Symbol;Acc:HGNC:12480]
1408	CRY2	cryptochrome circadian regulator 2 [Source:HGNC Symbol;Acc:HGNC:2385]
143425	SYT9	synaptotagmin 9 [Source:HGNC Symbol;Acc:HGNC:19265]
1436	CSF1R	colony stimulating factor 1 receptor [Source:HGNC Symbol;Acc:HGNC:2433]
146705	TEPSIN	TEPSIN adaptor related protein complex 4 accessory protein [Source:HGNC Symbol;Acc:HGNC:26458]
146956	EME1	essential meiotic structure-specific endonuclease 1 [Source:HGNC Symbol;Acc:HGNC:24965]
148014	TTC9B	tetratricopeptide repeat domain 9B [Source:HGNC Symbol;Acc:HGNC:26395]
148229	ATP8B3	ATPase phospholipid transporting 8B3 [Source:HGNC Symbol;Acc:HGNC:13535]
1496	CTNNA2	catenin alpha 2 [Source:HGNC Symbol;Acc:HGNC:2510]
149628	PYHIN1	pyrin and HIN domain family member 1 [Source:HGNC Symbol;Acc:HGNC:28894]
1501	CTNND2	catenin delta 2 [Source:HGNC Symbol;Acc:HGNC:2516]
151903	CCDC12	coiled-coil domain containing 12 [Source:HGNC Symbol;Acc:HGNC:28332]
152518	NFXL1	nuclear transcription factor, X-box binding like 1 [Source:HGNC Symbol;Acc:HGNC:18726]
153339	TMEM167A	transmembrane protein 167A [Source:HGNC Symbol;Acc:HGNC:28330]
1534	CYB561	cytochrome b561 [Source:HGNC Symbol;Acc:HGNC:2571]
157680	VPS13B	vacuolar protein sorting 13 homolog B [Source:HGNC Symbol;Acc:HGNC:2183]
157697	ERICH1	glutamate rich 1 [Source:HGNC Symbol;Acc:HGNC:27234]
157777	MCMDC2	minichromosome maintenance domain containing 2 [Source:HGNC Symbol;Acc:HGNC:26368]
158866	ZDHHC15	zinc finger DHHC-type containing 15 [Source:HGNC Symbol;Acc:HGNC:20342]
1653	DDX1	DEAD-box helicase 1 [Source:HGNC Symbol;Acc:HGNC:2734]
165918	RNF168	ring finger protein 168 [Source:HGNC Symbol;Acc:HGNC:26661]
1678	TIMM8A	translocase of inner mitochondrial membrane 8A [Source:HGNC Symbol;Acc:HGNC:11817]
171177	RHOV	ras homolog family member V [Source:HGNC Symbol;Acc:HGNC:18313]
1741	DLG3	discs large MAGUK scaffold protein 3 [Source:HGNC Symbol;Acc:HGNC:2902]
1850	DUSP8	dual specificity phosphatase 8 [Source:HGNC Symbol;Acc:HGNC:3074]
1889	ECE1	endothelin converting enzyme 1 [Source:HGNC Symbol;Acc:HGNC:3146]
1912	PHC2	polyhomeotic homolog 2 [Source:HGNC Symbol;Acc:HGNC:3183]
196483	EEF2KMT	eukaryotic elongation factor 2 lysine methyltransferase [Source:HGNC Symbol;Acc:HGNC:32221]
1967	EIF2B1	eukaryotic translation initiation factor 2B subunit alpha [Source:HGNC Symbol;Acc:HGNC:3257]
197	AHSG	alpha 2-HS glycoprotein [Source:HGNC Symbol;Acc:HGNC:349]
197258	FCSK	fucose kinase [Source:HGNC Symbol;Acc:HGNC:29500]
199	AIF1	allograft inflammatory factor 1 [Source:HGNC Symbol;Acc:HGNC:352]
200894	ARL13B	ADP ribosylation factor like GTPase 13B [Source:HGNC Symbol;Acc:HGNC:25419]
200933	FBXO45	F-box protein 45 [Source:HGNC Symbol;Acc:HGNC:29148]
201161	CENPV	centromere protein V [Source:HGNC Symbol;Acc:HGNC:29920]
202374	STK32A	serine/threonine kinase 32A [Source:HGNC Symbol;Acc:HGNC:28317]
2059	EPS8	epidermal growth factor receptor pathway substrate 8 [Source:HGNC Symbol;Acc:HGNC:3420]
2187	FANCB	FA complementation group B [Source:HGNC Symbol;Acc:HGNC:3583]
219771	CCNY	cyclin Y [Source:HGNC Symbol;Acc:HGNC:23354]
2218	FKTN	fukutin [Source:HGNC Symbol;Acc:HGNC:3622]
2245	FGD1	FYVE, RhoGEF and PH domain containing 1 [Source:HGNC Symbol;Acc:HGNC:3663]
22880	MORC2	MORC family CW-type zinc finger 2 [Source:HGNC Symbol;Acc:HGNC:23573]
22899	ARHGEF15	Rho guanine nucleotide exchange factor 15 [Source:HGNC Symbol;Acc:HGNC:15590]
22954	TRIM32	tripartite motif containing 32 [Source:HGNC Symbol;Acc:HGNC:16380]
23020	SNRNP200	small nuclear ribonucleoprotein U5 subunit 200 [Source:HGNC Symbol;Acc:HGNC:30859]
23040	MYT1L	myelin transcription factor 1 like [Source:HGNC Symbol;Acc:HGNC:7623]
2305	FOXM1	forkhead box M1 [Source:HGNC Symbol;Acc:HGNC:3818]
23059	CLUAP1	clusterin associated protein 1 [Source:HGNC Symbol;Acc:HGNC:19009]
23174	ZCCHC14	zinc finger CCHC-type containing 14 [Source:HGNC Symbol;Acc:HGNC:24134]
2321	FLT1	fms related tyrosine kinase 1 [Source:HGNC Symbol;Acc:HGNC:3763]
23216	TBC1D1	TBC1 domain family member 1 [Source:HGNC Symbol;Acc:HGNC:11578]
23284	ADGRL3	adhesion G protein-coupled receptor L3 [Source:HGNC Symbol;Acc:HGNC:20974]
23295	MGRN1	mahogunin ring finger 1 [Source:HGNC Symbol;Acc:HGNC:20254]
23312	DMXL2	Dmx like 2 [Source:HGNC Symbol;Acc:HGNC:2938]
23366	KIAA0895	KIAA0895 [Source:HGNC Symbol;Acc:HGNC:22206]
23368	PPP1R13B	protein phosphatase 1 regulatory subunit 13B [Source:HGNC Symbol;Acc:HGNC:14950]
23382	AHCYL2	adenosylhomocysteinase like 2 [Source:HGNC Symbol;Acc:HGNC:22204]
23383	MAU2	MAU2 sister chromatid cohesion factor [Source:HGNC Symbol;Acc:HGNC:29140]
23394	ADNP	activity dependent neuroprotector homeobox [Source:HGNC Symbol;Acc:HGNC:15766]
23421	ITGB3BP	integrin subunit beta 3 binding protein [Source:HGNC Symbol;Acc:HGNC:6157]
23438	HARS2	histidyl-tRNA synthetase 2, mitochondrial [Source:HGNC Symbol;Acc:HGNC:4817]
23523	CABIN1	calcineurin binding protein 1 [Source:HGNC Symbol;Acc:HGNC:24187]
23524	SRRM2	serine/arginine repetitive matrix 2 [Source:HGNC Symbol;Acc:HGNC:16639]
23549	DNPEP	aspartyl aminopeptidase [Source:HGNC Symbol;Acc:HGNC:2981]
23560	GTPBP4	GTP binding protein 4 [Source:HGNC Symbol;Acc:HGNC:21535]
23567	ZNF346	zinc finger protein 346 [Source:HGNC Symbol;Acc:HGNC:16403]
23587	ELP5	elongator acetyltransferase complex subunit 5 [Source:HGNC Symbol;Acc:HGNC:30617]
23588	KLHDC2	kelch domain containing 2 [Source:HGNC Symbol;Acc:HGNC:20231]
23620	NTSR2	neurotensin receptor 2 [Source:HGNC Symbol;Acc:HGNC:8040]
23621	BACE1	beta-secretase 1 [Source:HGNC Symbol;Acc:HGNC:933]
23787	MTCH1	mitochondrial carrier 1 [Source:HGNC Symbol;Acc:HGNC:17586]
253143	PRR14L	proline rich 14 like [Source:HGNC Symbol;Acc:HGNC:28738]
255758	TCTEX1D2	Tctex1 domain containing 2 [Source:HGNC Symbol;Acc:HGNC:28482]
2562	GABRB3	gamma-aminobutyric acid type A receptor beta3 subunit [Source:HGNC Symbol;Acc:HGNC:4083]
25799	ZNF324	zinc finger protein 324 [Source:HGNC Symbol;Acc:HGNC:14096]
2580	GAK	cyclin G associated kinase [Source:HGNC Symbol;Acc:HGNC:4113]
25806	VAX2	ventral anterior homeobox 2 [Source:HGNC Symbol;Acc:HGNC:12661]
25814	ATXN10	ataxin 10 [Source:HGNC Symbol;Acc:HGNC:10549]
25839	COG4	component of oligomeric golgi complex 4 [Source:HGNC Symbol;Acc:HGNC:18620]
25864	ABHD14A	abhydrolase domain containing 14A [Source:HGNC Symbol;Acc:HGNC:24538]
25921	ZDHHC5	zinc finger DHHC-type containing 5 [Source:HGNC Symbol;Acc:HGNC:18472]
259282	BOD1L1	biorientation of chromosomes in cell division 1 like 1 [Source:HGNC Symbol;Acc:HGNC:31792]
25940	FAM98A	family with sequence similarity 98 member A [Source:HGNC Symbol;Acc:HGNC:24520]
25942	SIN3A	SIN3 transcription regulator family member A [Source:HGNC Symbol;Acc:HGNC:19353]
25962	VIRMA	vir like m6A methyltransferase associated [Source:HGNC Symbol;Acc:HGNC:24500]
26003	GORASP2	golgi reassembly stacking protein 2 [Source:HGNC Symbol;Acc:HGNC:17500]
26024	PTCD1	pentatricopeptide repeat domain 1 [Source:HGNC Symbol;Acc:HGNC:22198]
26036	ZNF451	zinc finger protein 451 [Source:HGNC Symbol;Acc:HGNC:21091]
260425	MAGI3	membrane associated guanylate kinase, WW and PDZ domain containing 3 [Source:HGNC Symbol;Acc:HGNC:29647]
26086	GPSM1	G protein signaling modulator 1 [Source:HGNC Symbol;Acc:HGNC:17858]
26092	TOR1AIP1	torsin 1A interacting protein 1 [Source:HGNC Symbol;Acc:HGNC:29456]
26133	TRPC4AP	transient receptor potential cation channel subfamily C member 4 associated protein [Source:HGNC Symbol;Acc:HGNC:16181]
26151	NAT9	N-acetyltransferase 9 (putative) [Source:HGNC Symbol;Acc:HGNC:23133]
26155	NOC2L	NOC2 like nucleolar associated transcriptional repressor [Source:HGNC Symbol;Acc:HGNC:24517]
26160	IFT172	intraflagellar transport 172 [Source:HGNC Symbol;Acc:HGNC:30391]
26523	AGO1	argonaute RISC component 1 [Source:HGNC Symbol;Acc:HGNC:3262]
26575	RGS17	regulator of G protein signaling 17 [Source:HGNC Symbol;Acc:HGNC:14088]
27042	UTP25	UTP25 small subunit processor component [Source:HGNC Symbol;Acc:HGNC:28440]
27077	B9D1	B9 domain containing 1 [Source:HGNC Symbol;Acc:HGNC:24123]
27131	SNX5	sorting nexin 5 [Source:HGNC Symbol;Acc:HGNC:14969]
27158	NDOR1	NADPH dependent diflavin oxidoreductase 1 [Source:HGNC Symbol;Acc:HGNC:29838]
27241	BBS9	Bardet-Biedl syndrome 9 [Source:HGNC Symbol;Acc:HGNC:30000]
27335	EIF3K	eukaryotic translation initiation factor 3 subunit K [Source:HGNC Symbol;Acc:HGNC:24656]
27341	RRP7A	ribosomal RNA processing 7 homolog A [Source:HGNC Symbol;Acc:HGNC:24286]
2743	GLRB	glycine receptor beta [Source:HGNC Symbol;Acc:HGNC:4329]
2762	GMDS	GDP-mannose 4,6-dehydratase [Source:HGNC Symbol;Acc:HGNC:4369]
28316	CDH20	cadherin 20 [Source:HGNC Symbol;Acc:HGNC:1760]
283489	CHAMP1	chromosome alignment maintaining phosphoprotein 1 [Source:HGNC Symbol;Acc:HGNC:20311]
283659	PRTG	protogenin [Source:HGNC Symbol;Acc:HGNC:26373]
285590	SH3PXD2B	SH3 and PX domains 2B [Source:HGNC Symbol;Acc:HGNC:29242]
286257	PAXX	PAXX non-homologous end joining factor [Source:HGNC Symbol;Acc:HGNC:27849]
2868	GRK4	G protein-coupled receptor kinase 4 [Source:HGNC Symbol;Acc:HGNC:4543]
2870	GRK6	G protein-coupled receptor kinase 6 [Source:HGNC Symbol;Acc:HGNC:4545]
28971	AAMDC	adipogenesis associated Mth938 domain containing [Source:HGNC Symbol;Acc:HGNC:30205]
28988	DBNL	drebrin like [Source:HGNC Symbol;Acc:HGNC:2696]
29057	FAM156A	family with sequence similarity 156 member A [Source:HGNC Symbol;Acc:HGNC:30114]
29085	PHPT1	phosphohistidine phosphatase 1 [Source:HGNC Symbol;Acc:HGNC:30033]
2909	ARHGAP35	Rho GTPase activating protein 35 [Source:HGNC Symbol;Acc:HGNC:4591]
29099	COMMD9	COMM domain containing 9 [Source:HGNC Symbol;Acc:HGNC:25014]
29114	TAGLN3	transgelin 3 [Source:HGNC Symbol;Acc:HGNC:29868]
29117	BRD7	bromodomain containing 7 [Source:HGNC Symbol;Acc:HGNC:14310]
29882	ANAPC2	anaphase promoting complex subunit 2 [Source:HGNC Symbol;Acc:HGNC:19989]
29902	FAM216A	family with sequence similarity 216 member A [Source:HGNC Symbol;Acc:HGNC:30180]
29915	HCFC2	host cell factor C2 [Source:HGNC Symbol;Acc:HGNC:24972]
29928	TIMM22	translocase of inner mitochondrial membrane 22 [Source:HGNC Symbol;Acc:HGNC:17317]
29945	ANAPC4	anaphase promoting complex subunit 4 [Source:HGNC Symbol;Acc:HGNC:19990]
29951	PDZRN4	PDZ domain containing ring finger 4 [Source:HGNC Symbol;Acc:HGNC:30552]
29952	DPP7	dipeptidyl peptidase 7 [Source:HGNC Symbol;Acc:HGNC:14892]
30816	ERVW-1	endogenous retrovirus group W member 1, envelope [Source:HGNC Symbol;Acc:HGNC:13525]
30849	PIK3R4	phosphoinositide-3-kinase regulatory subunit 4 [Source:HGNC Symbol;Acc:HGNC:8982]
30850	CDR2L	cerebellar degeneration related protein 2 like [Source:HGNC Symbol;Acc:HGNC:29999]
3242	HPD	4-hydroxyphenylpyruvate dioxygenase [Source:HGNC Symbol;Acc:HGNC:5147]
339451	KLHL17	kelch like family member 17 [Source:HGNC Symbol;Acc:HGNC:24023]
340719	NANOS1	nanos C2HC-type zinc finger 1 [Source:HGNC Symbol;Acc:HGNC:23044]
345275	HSD17B13	hydroxysteroid 17-beta dehydrogenase 13 [Source:HGNC Symbol;Acc:HGNC:18685]
347442	DCAF8L2	DDB1 and CUL4 associated factor 8 like 2 [Source:HGNC Symbol;Acc:HGNC:31811]
348110	ARPIN	actin related protein 2/3 complex inhibitor [Source:HGNC Symbol;Acc:HGNC:28782]
348235	SKA2	spindle and kinetochore associated complex subunit 2 [Source:HGNC Symbol;Acc:HGNC:28006]
353322	ANKRD37	ankyrin repeat domain 37 [Source:HGNC Symbol;Acc:HGNC:29593]
3590	IL11RA	interleukin 11 receptor subunit alpha [Source:HGNC Symbol;Acc:HGNC:5967]
3692	EIF6	eukaryotic translation initiation factor 6 [Source:HGNC Symbol;Acc:HGNC:6159]
375759	C9orf50	chromosome 9 open reading frame 50 [Source:HGNC Symbol;Acc:HGNC:23677]
375775	PNPLA7	patatin like phospholipase domain containing 7 [Source:HGNC Symbol;Acc:HGNC:24768]
378708	CENPS	centromere protein S [Source:HGNC Symbol;Acc:HGNC:23163]
388021	TMEM179	transmembrane protein 179 [Source:HGNC Symbol;Acc:HGNC:20137]
388588	SMIM1	small integral membrane protein 1 (Vel blood group) [Source:HGNC Symbol;Acc:HGNC:44204]
388695	LYSMD1	LysM domain containing 1 [Source:HGNC Symbol;Acc:HGNC:32070]
389203	SMIM20	small integral membrane protein 20 [Source:HGNC Symbol;Acc:HGNC:37260]
3911	LAMA5	laminin subunit alpha 5 [Source:HGNC Symbol;Acc:HGNC:6485]
3916	LAMP1	lysosomal associated membrane protein 1 [Source:HGNC Symbol;Acc:HGNC:6499]
399979	SNX19	sorting nexin 19 [Source:HGNC Symbol;Acc:HGNC:21532]
400451	FAM174B	family with sequence similarity 174 member B [Source:HGNC Symbol;Acc:HGNC:34339]
400569	MED11	mediator complex subunit 11 [Source:HGNC Symbol;Acc:HGNC:32687]
401466	RBIS	ribosomal biogenesis factor [Source:HGNC Symbol;Acc:HGNC:32235]
402055	SRRD	SRR1 domain containing [Source:HGNC Symbol;Acc:HGNC:33910]
4069	LYZ	lysozyme [Source:HGNC Symbol;Acc:HGNC:6740]
4076	CAPRIN1	cell cycle associated protein 1 [Source:HGNC Symbol;Acc:HGNC:6743]
4134	MAP4	microtubule associated protein 4 [Source:HGNC Symbol;Acc:HGNC:6862]
4152	MBD1	methyl-CpG binding domain protein 1 [Source:HGNC Symbol;Acc:HGNC:6916]
4163	MCC	MCC regulator of WNT signaling pathway [Source:HGNC Symbol;Acc:HGNC:6935]
4194	MDM4	MDM4 regulator of p53 [Source:HGNC Symbol;Acc:HGNC:6974]
4238	MFAP3	microfibril associated protein 3 [Source:HGNC Symbol;Acc:HGNC:7034]
4637	MYL6	myosin light chain 6 [Source:HGNC Symbol;Acc:HGNC:7587]
4659	PPP1R12A	protein phosphatase 1 regulatory subunit 12A [Source:HGNC Symbol;Acc:HGNC:7618]
4682	NUBP1	nucleotide binding protein 1 [Source:HGNC Symbol;Acc:HGNC:8041]
4725	NDUFS5	NADH:ubiquinone oxidoreductase subunit S5 [Source:HGNC Symbol;Acc:HGNC:7712]
4784	NFIX	nuclear factor I X [Source:HGNC Symbol;Acc:HGNC:7788]
5034	P4HB	prolyl 4-hydroxylase subunit beta [Source:HGNC Symbol;Acc:HGNC:8548]
50511	SYCP3	synaptonemal complex protein 3 [Source:HGNC Symbol;Acc:HGNC:18130]
50649	ARHGEF4	Rho guanine nucleotide exchange factor 4 [Source:HGNC Symbol;Acc:HGNC:684]
5094	PCBP2	poly(rC) binding protein 2 [Source:HGNC Symbol;Acc:HGNC:8648]
51006	SLC35C2	solute carrier family 35 member C2 [Source:HGNC Symbol;Acc:HGNC:17117]
51026	GOLT1B	golgi transport 1B [Source:HGNC Symbol;Acc:HGNC:20175]
51053	GMNN	geminin DNA replication inhibitor [Source:HGNC Symbol;Acc:HGNC:17493]
51098	IFT52	intraflagellar transport 52 [Source:HGNC Symbol;Acc:HGNC:15901]
51112	TRAPPC12	trafficking protein particle complex 12 [Source:HGNC Symbol;Acc:HGNC:24284]
51149	MRNIP	MRN complex interacting protein [Source:HGNC Symbol;Acc:HGNC:30817]
51167	CYB5R4	cytochrome b5 reductase 4 [Source:HGNC Symbol;Acc:HGNC:20147]
51177	PLEKHO1	pleckstrin homology domain containing O1 [Source:HGNC Symbol;Acc:HGNC:24310]
51194	IPO11	importin 11 [Source:HGNC Symbol;Acc:HGNC:20628]
51202	DDX47	DEAD-box helicase 47 [Source:HGNC Symbol;Acc:HGNC:18682]
51234	EMC4	ER membrane protein complex subunit 4 [Source:HGNC Symbol;Acc:HGNC:28032]
51280	GOLM1	golgi membrane protein 1 [Source:HGNC Symbol;Acc:HGNC:15451]
51283	BFAR	bifunctional apoptosis regulator [Source:HGNC Symbol;Acc:HGNC:17613]
51310	SLC22A17	solute carrier family 22 member 17 [Source:HGNC Symbol;Acc:HGNC:23095]
51398	WDR83OS	WD repeat domain 83 opposite strand [Source:HGNC Symbol;Acc:HGNC:30203]
51501	HIKESHI	Hikeshi, heat shock protein nuclear import factor [Source:HGNC Symbol;Acc:HGNC:26938]
51507	RTF2	replication termination factor 2 [Source:HGNC Symbol;Acc:HGNC:15890]
51514	DTL	denticleless E3 ubiquitin protein ligase homolog [Source:HGNC Symbol;Acc:HGNC:30288]
51526	OSER1	oxidative stress responsive serine rich 1 [Source:HGNC Symbol;Acc:HGNC:16105]
5153	PDE1B	phosphodiesterase 1B [Source:HGNC Symbol;Acc:HGNC:8775]
51542	VPS54	VPS54 subunit of GARP complex [Source:HGNC Symbol;Acc:HGNC:18652]
51603	EEF1AKNMT	eEF1A lysine and N-terminal methyltransferase [Source:HGNC Symbol;Acc:HGNC:24248]
51637	RTRAF	RNA transcription, translation and transport factor [Source:HGNC Symbol;Acc:HGNC:23169]
51645	PPIL1	peptidylprolyl isomerase like 1 [Source:HGNC Symbol;Acc:HGNC:9260]
51652	CHMP3	charged multivesicular body protein 3 [Source:HGNC Symbol;Acc:HGNC:29865]
51668	HSPB11	heat shock protein family B (small) member 11 [Source:HGNC Symbol;Acc:HGNC:25019]
51669	SARAF	store-operated calcium entry associated regulatory factor [Source:HGNC Symbol;Acc:HGNC:28789]
51673	TPPP3	tubulin polymerization promoting protein family member 3 [Source:HGNC Symbol;Acc:HGNC:24162]
51678	MPP6	membrane palmitoylated protein 6 [Source:HGNC Symbol;Acc:HGNC:18167]
51692	CPSF3	cleavage and polyadenylation specific factor 3 [Source:HGNC Symbol;Acc:HGNC:2326]
51715	RAB23	RAB23, member RAS oncogene family [Source:HGNC Symbol;Acc:HGNC:14263]
5188	GATB	glutamyl-tRNA amidotransferase subunit B [Source:HGNC Symbol;Acc:HGNC:8849]
5257	PHKB	phosphorylase kinase regulatory subunit beta [Source:HGNC Symbol;Acc:HGNC:8927]
53335	BCL11A	BAF chromatin remodeling complex subunit BCL11A [Source:HGNC Symbol;Acc:HGNC:13221]
54453	RIN2	Ras and Rab interactor 2 [Source:HGNC Symbol;Acc:HGNC:18750]
54472	TOLLIP	toll interacting protein [Source:HGNC Symbol;Acc:HGNC:16476]
54529	ASNSD1	asparagine synthetase domain containing 1 [Source:HGNC Symbol;Acc:HGNC:24910]
5476	CTSA	cathepsin A [Source:HGNC Symbol;Acc:HGNC:9251]
54806	AHI1	Abelson helper integration site 1 [Source:HGNC Symbol;Acc:HGNC:21575]
54856	GON4L	gon-4 like [Source:HGNC Symbol;Acc:HGNC:25973]
548593	SLX1A	SLX1 homolog A, structure-specific endonuclease subunit [Source:HGNC Symbol;Acc:HGNC:20922]
54862	CC2D1A	coiled-coil and C2 domain containing 1A [Source:HGNC Symbol;Acc:HGNC:30237]
54927	CHCHD3	coiled-coil-helix-coiled-coil-helix domain containing 3 [Source:HGNC Symbol;Acc:HGNC:21906]
54928	IMPAD1	inositol monophosphatase domain containing 1 [Source:HGNC Symbol;Acc:HGNC:26019]
54939	COMMD4	COMM domain containing 4 [Source:HGNC Symbol;Acc:HGNC:26027]
54949	SDHAF2	succinate dehydrogenase complex assembly factor 2 [Source:HGNC Symbol;Acc:HGNC:26034]
54973	INTS11	integrator complex subunit 11 [Source:HGNC Symbol;Acc:HGNC:26052]
5500	PPP1CB	protein phosphatase 1 catalytic subunit beta [Source:HGNC Symbol;Acc:HGNC:9282]
55005	RMND1	required for meiotic nuclear division 1 homolog [Source:HGNC Symbol;Acc:HGNC:21176]
55012	PPP2R3C	protein phosphatase 2 regulatory subunit B''gamma [Source:HGNC Symbol;Acc:HGNC:17485]
55084	SOBP	sine oculis binding protein homolog [Source:HGNC Symbol;Acc:HGNC:29256]
55090	MED9	mediator complex subunit 9 [Source:HGNC Symbol;Acc:HGNC:25487]
55119	PRPF38B	pre-mRNA processing factor 38B [Source:HGNC Symbol;Acc:HGNC:25512]
55122	AKIRIN2	akirin 2 [Source:HGNC Symbol;Acc:HGNC:21407]
55157	DARS2	aspartyl-tRNA synthetase 2, mitochondrial [Source:HGNC Symbol;Acc:HGNC:25538]
55167	MSL2	MSL complex subunit 2 [Source:HGNC Symbol;Acc:HGNC:25544]
55206	SBNO1	strawberry notch homolog 1 [Source:HGNC Symbol;Acc:HGNC:22973]
55210	ATAD3A	ATPase family AAA domain containing 3A [Source:HGNC Symbol;Acc:HGNC:25567]
55230	USP40	ubiquitin specific peptidase 40 [Source:HGNC Symbol;Acc:HGNC:20069]
55238	SLC38A7	solute carrier family 38 member 7 [Source:HGNC Symbol;Acc:HGNC:25582]
55268	ECHDC2	enoyl-CoA hydratase domain containing 2 [Source:HGNC Symbol;Acc:HGNC:23408]
55325	UFSP2	UFM1 specific peptidase 2 [Source:HGNC Symbol;Acc:HGNC:25640]
55379	LRRC59	leucine rich repeat containing 59 [Source:HGNC Symbol;Acc:HGNC:28817]
55388	MCM10	minichromosome maintenance 10 replication initiation factor [Source:HGNC Symbol;Acc:HGNC:18043]
55585	UBE2Q1	ubiquitin conjugating enzyme E2 Q1 [Source:HGNC Symbol;Acc:HGNC:15698]
55617	TASP1	taspase 1 [Source:HGNC Symbol;Acc:HGNC:15859]
55662	HIF1AN	hypoxia inducible factor 1 subunit alpha inhibitor [Source:HGNC Symbol;Acc:HGNC:17113]
55665	URGCP	upregulator of cell proliferation [Source:HGNC Symbol;Acc:HGNC:30890]
55680	RUFY2	RUN and FYVE domain containing 2 [Source:HGNC Symbol;Acc:HGNC:19761]
55713	ZNF334	zinc finger protein 334 [Source:HGNC Symbol;Acc:HGNC:15806]
55720	TSR1	TSR1 ribosome maturation factor [Source:HGNC Symbol;Acc:HGNC:25542]
55746	NUP133	nucleoporin 133 [Source:HGNC Symbol;Acc:HGNC:18016]
55763	EXOC1	exocyst complex component 1 [Source:HGNC Symbol;Acc:HGNC:30380]
55837	EAPP	E2F associated phosphoprotein [Source:HGNC Symbol;Acc:HGNC:19312]
55854	ZC3H15	zinc finger CCCH-type containing 15 [Source:HGNC Symbol;Acc:HGNC:29528]
5587	PRKD1	protein kinase D1 [Source:HGNC Symbol;Acc:HGNC:9407]
5589	PRKCSH	protein kinase C substrate 80K-H [Source:HGNC Symbol;Acc:HGNC:9411]
55898	UNC45A	unc-45 myosin chaperone A [Source:HGNC Symbol;Acc:HGNC:30594]
55971	BAIAP2L1	BAI1 associated protein 2 like 1 [Source:HGNC Symbol;Acc:HGNC:21649]
56171	DNAH7	dynein axonemal heavy chain 7 [Source:HGNC Symbol;Acc:HGNC:18661]
5630	PRPH	peripherin [Source:HGNC Symbol;Acc:HGNC:9461]
5686	PSMA5	proteasome subunit alpha 5 [Source:HGNC Symbol;Acc:HGNC:9534]
56886	UGGT1	UDP-glucose glycoprotein glucosyltransferase 1 [Source:HGNC Symbol;Acc:HGNC:15663]
5689	PSMB1	proteasome subunit beta 1 [Source:HGNC Symbol;Acc:HGNC:9537]
56893	UBQLN4	ubiquilin 4 [Source:HGNC Symbol;Acc:HGNC:1237]
56927	GPR108	G protein-coupled receptor 108 [Source:HGNC Symbol;Acc:HGNC:17829]
56929	FEM1C	fem-1 homolog C [Source:HGNC Symbol;Acc:HGNC:16933]
56975	FAM20C	FAM20C golgi associated secretory pathway kinase [Source:HGNC Symbol;Acc:HGNC:22140]
57038	RARS2	arginyl-tRNA synthetase 2, mitochondrial [Source:HGNC Symbol;Acc:HGNC:21406]
57094	CPA6	carboxypeptidase A6 [Source:HGNC Symbol;Acc:HGNC:17245]
57109	REXO4	REX4 homolog, 3'-5' exonuclease [Source:HGNC Symbol;Acc:HGNC:12820]
57147	SCYL3	SCY1 like pseudokinase 3 [Source:HGNC Symbol;Acc:HGNC:19285]
57175	CORO1B	coronin 1B [Source:HGNC Symbol;Acc:HGNC:2253]
57187	THOC2	THO complex 2 [Source:HGNC Symbol;Acc:HGNC:19073]
57215	THAP11	THAP domain containing 11 [Source:HGNC Symbol;Acc:HGNC:23194]
57335	ZNF286A	zinc finger protein 286A [Source:HGNC Symbol;Acc:HGNC:13501]
57446	NDRG3	NDRG family member 3 [Source:HGNC Symbol;Acc:HGNC:14462]
57498	KIDINS220	kinase D interacting substrate 220 [Source:HGNC Symbol;Acc:HGNC:29508]
57510	XPO5	exportin 5 [Source:HGNC Symbol;Acc:HGNC:17675]
57558	USP35	ubiquitin specific peptidase 35 [Source:HGNC Symbol;Acc:HGNC:20061]
57619	SHROOM3	shroom family member 3 [Source:HGNC Symbol;Acc:HGNC:30422]
57655	GRAMD1A	GRAM domain containing 1A [Source:HGNC Symbol;Acc:HGNC:29305]
57706	DENND1A	DENN domain containing 1A [Source:HGNC Symbol;Acc:HGNC:29324]
57817	HAMP	hepcidin antimicrobial peptide [Source:HGNC Symbol;Acc:HGNC:15598]
5822	PWP2	PWP2 small subunit processome component [Source:HGNC Symbol;Acc:HGNC:9711]
585	BBS4	Bardet-Biedl syndrome 4 [Source:HGNC Symbol;Acc:HGNC:969]
5870	RAB6A	RAB6A, member RAS oncogene family [Source:HGNC Symbol;Acc:HGNC:9786]
59269	HIVEP3	human immunodeficiency virus type I enhancer binding protein 3 [Source:HGNC Symbol;Acc:HGNC:13561]
5973	RENBP	renin binding protein [Source:HGNC Symbol;Acc:HGNC:9959]
5987	TRIM27	tripartite motif containing 27 [Source:HGNC Symbol;Acc:HGNC:9975]
6046	BRD2	bromodomain containing 2 [Source:HGNC Symbol;Acc:HGNC:1103]
60468	BACH2	BTB domain and CNC homolog 2 [Source:HGNC Symbol;Acc:HGNC:14078]
60526	LDAH	lipid droplet associated hydrolase [Source:HGNC Symbol;Acc:HGNC:26145]
60528	ELAC2	elaC ribonuclease Z 2 [Source:HGNC Symbol;Acc:HGNC:14198]
6097	RORC	RAR related orphan receptor C [Source:HGNC Symbol;Acc:HGNC:10260]
6136	RPL12	ribosomal protein L12 [Source:HGNC Symbol;Acc:HGNC:10302]
6201	RPS7	ribosomal protein S7 [Source:HGNC Symbol;Acc:HGNC:10440]
6218	RPS17	ribosomal protein S17 [Source:HGNC Symbol;Acc:HGNC:10397]
622	BDH1	3-hydroxybutyrate dehydrogenase 1 [Source:HGNC Symbol;Acc:HGNC:1027]
6253	RTN2	reticulon 2 [Source:HGNC Symbol;Acc:HGNC:10468]
6341	SCO1	SCO cytochrome c oxidase assembly protein 1 [Source:HGNC Symbol;Acc:HGNC:10603]
63922	CHTF18	chromosome transmission fidelity factor 18 [Source:HGNC Symbol;Acc:HGNC:18435]
63925	ZNF335	zinc finger protein 335 [Source:HGNC Symbol;Acc:HGNC:15807]
6396	SEC13	SEC13 homolog, nuclear pore and COPII coat complex component [Source:HGNC Symbol;Acc:HGNC:10697]
64062	RBM26	RNA binding motif protein 26 [Source:HGNC Symbol;Acc:HGNC:20327]
641371	ACOT1	acyl-CoA thioesterase 1 [Source:HGNC Symbol;Acc:HGNC:33128]
643236	TMEM72	transmembrane protein 72 [Source:HGNC Symbol;Acc:HGNC:31658]
64359	NXN	nucleoredoxin [Source:HGNC Symbol;Acc:HGNC:18008]
64410	KLHL25	kelch like family member 25 [Source:HGNC Symbol;Acc:HGNC:25732]
64412	GZF1	GDNF inducible zinc finger protein 1 [Source:HGNC Symbol;Acc:HGNC:15808]
64429	ZDHHC6	zinc finger DHHC-type containing 6 [Source:HGNC Symbol;Acc:HGNC:19160]
6449	SGTA	small glutamine rich tetratricopeptide repeat containing alpha [Source:HGNC Symbol;Acc:HGNC:10819]
64689	GORASP1	golgi reassembly stacking protein 1 [Source:HGNC Symbol;Acc:HGNC:16769]
64744	SMAP2	small ArfGAP2 [Source:HGNC Symbol;Acc:HGNC:25082]
64854	USP46	ubiquitin specific peptidase 46 [Source:HGNC Symbol;Acc:HGNC:20075]
64901	RANBP17	RAN binding protein 17 [Source:HGNC Symbol;Acc:HGNC:14428]
6508	SLC4A3	solute carrier family 4 member 3 [Source:HGNC Symbol;Acc:HGNC:11029]
651746	ANKRD33B	ankyrin repeat domain 33B [Source:HGNC Symbol;Acc:HGNC:35240]
65263	PYCR3	pyrroline-5-carboxylate reductase 3 [Source:HGNC Symbol;Acc:HGNC:25846]
65264	UBE2Z	ubiquitin conjugating enzyme E2 Z [Source:HGNC Symbol;Acc:HGNC:25847]
65981	CAPRIN2	caprin family member 2 [Source:HGNC Symbol;Acc:HGNC:21259]
65991	FUNDC2	FUN14 domain containing 2 [Source:HGNC Symbol;Acc:HGNC:24925]
66000	TMEM108	transmembrane protein 108 [Source:HGNC Symbol;Acc:HGNC:28451]
6601	SMARCC2	SWI/SNF related, matrix associated, actin dependent regulator of chromatin subfamily c member 2 [Source:HGNC Symbol;Acc:HGNC:11105]
6604	SMARCD3	SWI/SNF related, matrix associated, actin dependent regulator of chromatin, subfamily d, member 3 [Source:HGNC Symbol;Acc:HGNC:11108]
661	POLR3D	RNA polymerase III subunit D [Source:HGNC Symbol;Acc:HGNC:1080]
6729	SRP54	signal recognition particle 54 [Source:HGNC Symbol;Acc:HGNC:11301]
6746	SSR2	signal sequence receptor subunit 2 [Source:HGNC Symbol;Acc:HGNC:11324]
6786	STIM1	stromal interaction molecule 1 [Source:HGNC Symbol;Acc:HGNC:11386]
6835	SURF2	surfeit 2 [Source:HGNC Symbol;Acc:HGNC:11475]
6836	SURF4	surfeit 4 [Source:HGNC Symbol;Acc:HGNC:11476]
6909	TBX2	T-box 2 [Source:HGNC Symbol;Acc:HGNC:11597]
6988	TCTA	T cell leukemia translocation altered [Source:HGNC Symbol;Acc:HGNC:11692]
7019	TFAM	transcription factor A, mitochondrial [Source:HGNC Symbol;Acc:HGNC:11741]
7104	TM4SF4	transmembrane 4 L six family member 4 [Source:HGNC Symbol;Acc:HGNC:11856]
7114	TMSB4X	thymosin beta 4 X-linked [Source:HGNC Symbol;Acc:HGNC:11881]
7156	TOP3A	DNA topoisomerase III alpha [Source:HGNC Symbol;Acc:HGNC:11992]
720	C4A	complement C4A (Rodgers blood group) [Source:HGNC Symbol;Acc:HGNC:1323]
729515	TMEM242	transmembrane protein 242 [Source:HGNC Symbol;Acc:HGNC:17206]
7404	UTY	ubiquitously transcribed tetratricopeptide repeat containing, Y-linked [Source:HGNC Symbol;Acc:HGNC:12638]
7580	ZNF32	zinc finger protein 32 [Source:HGNC Symbol;Acc:HGNC:13095]
7675	ZNF121	zinc finger protein 121 [Source:HGNC Symbol;Acc:HGNC:12904]
7803	PTP4A1	protein tyrosine phosphatase 4A1 [Source:HGNC Symbol;Acc:HGNC:9634]
78992	YIPF2	Yip1 domain family member 2 [Source:HGNC Symbol;Acc:HGNC:28476]
78995	C17orf53	chromosome 17 open reading frame 53 [Source:HGNC Symbol;Acc:HGNC:28460]
79005	SCNM1	sodium channel modifier 1 [Source:HGNC Symbol;Acc:HGNC:23136]
79012	CAMKV	CaM kinase like vesicle associated [Source:HGNC Symbol;Acc:HGNC:28788]
79036	KXD1	KxDL motif containing 1 [Source:HGNC Symbol;Acc:HGNC:28420]
79135	APOO	apolipoprotein O [Source:HGNC Symbol;Acc:HGNC:28727]
7917	BAG6	BCL2 associated athanogene 6 [Source:HGNC Symbol;Acc:HGNC:13919]
79188	TMEM43	transmembrane protein 43 [Source:HGNC Symbol;Acc:HGNC:28472]
79364	ZXDC	ZXD family zinc finger C [Source:HGNC Symbol;Acc:HGNC:28160]
79590	MRPL24	mitochondrial ribosomal protein L24 [Source:HGNC Symbol;Acc:HGNC:14037]
79603	CERS4	ceramide synthase 4 [Source:HGNC Symbol;Acc:HGNC:23747]
79605	PGBD5	piggyBac transposable element derived 5 [Source:HGNC Symbol;Acc:HGNC:19405]
79618	HMBOX1	homeobox containing 1 [Source:HGNC Symbol;Acc:HGNC:26137]
79621	RNASEH2B	ribonuclease H2 subunit B [Source:HGNC Symbol;Acc:HGNC:25671]
79622	SNRNP25	small nuclear ribonucleoprotein U11/U12 subunit 25 [Source:HGNC Symbol;Acc:HGNC:14161]
79673	ZNF329	zinc finger protein 329 [Source:HGNC Symbol;Acc:HGNC:14209]
79716	NPEPL1	aminopeptidase like 1 [Source:HGNC Symbol;Acc:HGNC:16244]
79778	MICALL2	MICAL like 2 [Source:HGNC Symbol;Acc:HGNC:29672]
79794	C12orf49	chromosome 12 open reading frame 49 [Source:HGNC Symbol;Acc:HGNC:26128]
79822	ARHGAP28	Rho GTPase activating protein 28 [Source:HGNC Symbol;Acc:HGNC:25509]
79874	RABEP2	rabaptin, RAB GTPase binding effector protein 2 [Source:HGNC Symbol;Acc:HGNC:24817]
79876	UBA5	ubiquitin like modifier activating enzyme 5 [Source:HGNC Symbol;Acc:HGNC:23230]
79902	NUP85	nucleoporin 85 [Source:HGNC Symbol;Acc:HGNC:8734]
80018	NAA25	N(alpha)-acetyltransferase 25, NatB auxiliary subunit [Source:HGNC Symbol;Acc:HGNC:25783]
80095	ZNF606	zinc finger protein 606 [Source:HGNC Symbol;Acc:HGNC:25879]
80145	THOC7	THO complex 7 [Source:HGNC Symbol;Acc:HGNC:29874]
80209	PROSER1	proline and serine rich 1 [Source:HGNC Symbol;Acc:HGNC:20291]
80212	CCDC92	coiled-coil domain containing 92 [Source:HGNC Symbol;Acc:HGNC:29563]
80222	TARS2	threonyl-tRNA synthetase 2, mitochondrial [Source:HGNC Symbol;Acc:HGNC:30740]
80230	RUFY1	RUN and FYVE domain containing 1 [Source:HGNC Symbol;Acc:HGNC:19760]
80232	WDR26	WD repeat domain 26 [Source:HGNC Symbol;Acc:HGNC:21208]
80262	C16orf70	chromosome 16 open reading frame 70 [Source:HGNC Symbol;Acc:HGNC:29564]
80308	FLAD1	flavin adenine dinucleotide synthetase 1 [Source:HGNC Symbol;Acc:HGNC:24671]
80331	DNAJC5	DnaJ heat shock protein family (Hsp40) member C5 [Source:HGNC Symbol;Acc:HGNC:16235]
805	CALM2	calmodulin 2 [Source:HGNC Symbol;Acc:HGNC:1445]
80755	AARSD1	alanyl-tRNA synthetase domain containing 1 [Source:HGNC Symbol;Acc:HGNC:28417]
80778	ZNF34	zinc finger protein 34 [Source:HGNC Symbol;Acc:HGNC:13098]
80781	COL18A1	collagen type XVIII alpha 1 chain [Source:HGNC Symbol;Acc:HGNC:2195]
80789	INTS5	integrator complex subunit 5 [Source:HGNC Symbol;Acc:HGNC:29352]
8087	FXR1	FMR1 autosomal homolog 1 [Source:HGNC Symbol;Acc:HGNC:4023]
8120	AP3B2	adaptor related protein complex 3 subunit beta 2 [Source:HGNC Symbol;Acc:HGNC:567]
8128	ST8SIA2	ST8 alpha-N-acetyl-neuraminide alpha-2,8-sialyltransferase 2 [Source:HGNC Symbol;Acc:HGNC:10870]
81620	CDT1	chromatin licensing and DNA replication factor 1 [Source:HGNC Symbol;Acc:HGNC:24576]
81631	MAP1LC3B	microtubule associated protein 1 light chain 3 beta [Source:HGNC Symbol;Acc:HGNC:13352]
81844	TRIM56	tripartite motif containing 56 [Source:HGNC Symbol;Acc:HGNC:19028]
8314	BAP1	BRCA1 associated protein 1 [Source:HGNC Symbol;Acc:HGNC:950]
83451	ABHD11	abhydrolase domain containing 11 [Source:HGNC Symbol;Acc:HGNC:16407]
83452	RAB33B	RAB33B, member RAS oncogene family [Source:HGNC Symbol;Acc:HGNC:16075]
83541	FAM110A	family with sequence similarity 110 member A [Source:HGNC Symbol;Acc:HGNC:16188]
83719	YPEL3	yippee like 3 [Source:HGNC Symbol;Acc:HGNC:18327]
83786	FRMD8	FERM domain containing 8 [Source:HGNC Symbol;Acc:HGNC:25462]
83877	TM2D2	TM2 domain containing 2 [Source:HGNC Symbol;Acc:HGNC:24127]
84083	ZRANB3	zinc finger RANBP2-type containing 3 [Source:HGNC Symbol;Acc:HGNC:25249]
84148	KAT8	lysine acetyltransferase 8 [Source:HGNC Symbol;Acc:HGNC:17933]
84246	MED10	mediator complex subunit 10 [Source:HGNC Symbol;Acc:HGNC:28760]
84259	DCUN1D5	defective in cullin neddylation 1 domain containing 5 [Source:HGNC Symbol;Acc:HGNC:28409]
84268	RPAIN	RPA interacting protein [Source:HGNC Symbol;Acc:HGNC:28641]
84279	PRADC1	protease associated domain containing 1 [Source:HGNC Symbol;Acc:HGNC:16047]
84285	EIF1AD	eukaryotic translation initiation factor 1A domain containing [Source:HGNC Symbol;Acc:HGNC:28147]
84287	ZDHHC16	zinc finger DHHC-type containing 16 [Source:HGNC Symbol;Acc:HGNC:20714]
84288	EFCAB2	EF-hand calcium binding domain 2 [Source:HGNC Symbol;Acc:HGNC:28166]
84292	WDR83	WD repeat domain 83 [Source:HGNC Symbol;Acc:HGNC:32672]
84302	TMEM246	transmembrane protein 246 [Source:HGNC Symbol;Acc:HGNC:28180]
84309	NUDT16L1	nudix hydrolase 16 like 1 [Source:HGNC Symbol;Acc:HGNC:28154]
84440	RAB11FIP4	RAB11 family interacting protein 4 [Source:HGNC Symbol;Acc:HGNC:30267]
84498	FAM120B	family with sequence similarity 120B [Source:HGNC Symbol;Acc:HGNC:21109]
84516	DCTN5	dynactin subunit 5 [Source:HGNC Symbol;Acc:HGNC:24594]
84548	TMEM185A	transmembrane protein 185A [Source:HGNC Symbol;Acc:HGNC:17125]
84553	FAXC	failed axon connections homolog, metaxin like GST domain containing [Source:HGNC Symbol;Acc:HGNC:20742]
8467	SMARCA5	SWI/SNF related, matrix associated, actin dependent regulator of chromatin, subfamily a, member 5 [Source:HGNC Symbol;Acc:HGNC:11101]
8479	HIRIP3	HIRA interacting protein 3 [Source:HGNC Symbol;Acc:HGNC:4917]
84817	TXNDC17	thioredoxin domain containing 17 [Source:HGNC Symbol;Acc:HGNC:28218]
84861	KLHL22	kelch like family member 22 [Source:HGNC Symbol;Acc:HGNC:25888]
84886	C1orf198	chromosome 1 open reading frame 198 [Source:HGNC Symbol;Acc:HGNC:25900]
84890	ADO	2-aminoethanethiol dioxygenase [Source:HGNC Symbol;Acc:HGNC:23506]
84904	ARHGEF39	Rho guanine nucleotide exchange factor 39 [Source:HGNC Symbol;Acc:HGNC:25909]
84912	SLC35B4	solute carrier family 35 member B4 [Source:HGNC Symbol;Acc:HGNC:20584]
84945	ABHD13	abhydrolase domain containing 13 [Source:HGNC Symbol;Acc:HGNC:20293]
84959	UBASH3B	ubiquitin associated and SH3 domain containing B [Source:HGNC Symbol;Acc:HGNC:29884]
84964	ALKBH6	alkB homolog 6 [Source:HGNC Symbol;Acc:HGNC:28243]
85013	TMEM128	transmembrane protein 128 [Source:HGNC Symbol;Acc:HGNC:28201]
8527	DGKD	diacylglycerol kinase delta [Source:HGNC Symbol;Acc:HGNC:2851]
85300	ATCAY	ATCAY kinesin light chain interacting caytaxin [Source:HGNC Symbol;Acc:HGNC:779]
85313	PPIL4	peptidylprolyl isomerase like 4 [Source:HGNC Symbol;Acc:HGNC:15702]
85364	ZCCHC3	zinc finger CCHC-type containing 3 [Source:HGNC Symbol;Acc:HGNC:16230]
85369	STRIP1	striatin interacting protein 1 [Source:HGNC Symbol;Acc:HGNC:25916]
8539	API5	apoptosis inhibitor 5 [Source:HGNC Symbol;Acc:HGNC:594]
8575	PRKRA	protein activator of interferon induced protein kinase EIF2AK2 [Source:HGNC Symbol;Acc:HGNC:9438]
8603	FAM193A	family with sequence similarity 193 member A [Source:HGNC Symbol;Acc:HGNC:16822]
862	RUNX1T1	RUNX1 translocation partner 1 [Source:HGNC Symbol;Acc:HGNC:1535]
8622	PDE8B	phosphodiesterase 8B [Source:HGNC Symbol;Acc:HGNC:8794]
8655	DYNLL1	dynein light chain LC8-type 1 [Source:HGNC Symbol;Acc:HGNC:15476]
8738	CRADD	CASP2 and RIPK1 domain containing adaptor with death domain [Source:HGNC Symbol;Acc:HGNC:2340]
8813	DPM1	dolichyl-phosphate mannosyltransferase subunit 1, catalytic [Source:HGNC Symbol;Acc:HGNC:3005]
8824	CES2	carboxylesterase 2 [Source:HGNC Symbol;Acc:HGNC:1864]
8887	TAX1BP1	Tax1 binding protein 1 [Source:HGNC Symbol;Acc:HGNC:11575]
8930	MBD4	methyl-CpG binding domain 4, DNA glycosylase [Source:HGNC Symbol;Acc:HGNC:6919]
8970	HIST1H2BJ	histone cluster 1 H2B family member j [Source:HGNC Symbol;Acc:HGNC:4761]
89846	FGD3	FYVE, RhoGEF and PH domain containing 3 [Source:HGNC Symbol;Acc:HGNC:16027]
89910	UBE3B	ubiquitin protein ligase E3B [Source:HGNC Symbol;Acc:HGNC:13478]
89953	KLC4	kinesin light chain 4 [Source:HGNC Symbol;Acc:HGNC:21624]
9016	SLC25A14	solute carrier family 25 member 14 [Source:HGNC Symbol;Acc:HGNC:10984]
90204	ZSWIM1	zinc finger SWIM-type containing 1 [Source:HGNC Symbol;Acc:HGNC:16155]
90381	TICRR	TOPBP1 interacting checkpoint and replication regulator [Source:HGNC Symbol;Acc:HGNC:28704]
90441	ZNF622	zinc finger protein 622 [Source:HGNC Symbol;Acc:HGNC:30958]
90488	TMEM263	transmembrane protein 263 [Source:HGNC Symbol;Acc:HGNC:28281]
90637	ZFAND2A	zinc finger AN1-type containing 2A [Source:HGNC Symbol;Acc:HGNC:28073]
90701	SEC11C	SEC11 homolog C, signal peptidase complex subunit [Source:HGNC Symbol;Acc:HGNC:23400]
90850	ZNF598	zinc finger protein 598 [Source:HGNC Symbol;Acc:HGNC:28079]
91373	UAP1L1	UDP-N-acetylglucosamine pyrophosphorylase 1 like 1 [Source:HGNC Symbol;Acc:HGNC:28082]
91445	RNF185	ring finger protein 185 [Source:HGNC Symbol;Acc:HGNC:26783]
91526	ANKRD44	ankyrin repeat domain 44 [Source:HGNC Symbol;Acc:HGNC:25259]
91544	UBXN11	UBX domain protein 11 [Source:HGNC Symbol;Acc:HGNC:30600]
91782	CHMP7	charged multivesicular body protein 7 [Source:HGNC Symbol;Acc:HGNC:28439]
9204	ZMYM6	zinc finger MYM-type containing 6 [Source:HGNC Symbol;Acc:HGNC:13050]
9205	ZMYM5	zinc finger MYM-type containing 5 [Source:HGNC Symbol;Acc:HGNC:13029]
9209	LRRFIP2	LRR binding FLII interacting protein 2 [Source:HGNC Symbol;Acc:HGNC:6703]
92140	MTDH	metadherin [Source:HGNC Symbol;Acc:HGNC:29608]
92305	TMEM129	transmembrane protein 129 [Source:HGNC Symbol;Acc:HGNC:25137]
9255	AIMP1	aminoacyl tRNA synthetase complex interacting multifunctional protein 1 [Source:HGNC Symbol;Acc:HGNC:10648]
92714	ARRDC1	arrestin domain containing 1 [Source:HGNC Symbol;Acc:HGNC:28633]
92799	SHKBP1	SH3KBP1 binding protein 1 [Source:HGNC Symbol;Acc:HGNC:19214]
92822	ZNF276	zinc finger protein 276 [Source:HGNC Symbol;Acc:HGNC:23330]
9295	SRSF11	serine and arginine rich splicing factor 11 [Source:HGNC Symbol;Acc:HGNC:10782]
9330	GTF3C3	general transcription factor IIIC subunit 3 [Source:HGNC Symbol;Acc:HGNC:4666]
93380	MMGT1	membrane magnesium transporter 1 [Source:HGNC Symbol;Acc:HGNC:28100]
9382	COG1	component of oligomeric golgi complex 1 [Source:NCBI gene;Acc:9382]
94104	PAXBP1	PAX3 and PAX7 binding protein 1 [Source:HGNC Symbol;Acc:HGNC:13579]
9445	ITM2B	integral membrane protein 2B [Source:HGNC Symbol;Acc:HGNC:6174]
9477	MED20	mediator complex subunit 20 [Source:HGNC Symbol;Acc:HGNC:16840]
9507	ADAMTS4	ADAM metallopeptidase with thrombospondin type 1 motif 4 [Source:HGNC Symbol;Acc:HGNC:220]
9552	SPAG7	sperm associated antigen 7 [Source:HGNC Symbol;Acc:HGNC:11216]
9569	GTF2IRD1	GTF2I repeat domain containing 1 [Source:HGNC Symbol;Acc:HGNC:4661]
9656	MDC1	mediator of DNA damage checkpoint 1 [Source:HGNC Symbol;Acc:HGNC:21163]
9667	SAFB2	scaffold attachment factor B2 [Source:HGNC Symbol;Acc:HGNC:21605]
9690	UBE3C	ubiquitin protein ligase E3C [Source:HGNC Symbol;Acc:HGNC:16803]
9694	EMC2	ER membrane protein complex subunit 2 [Source:HGNC Symbol;Acc:HGNC:28963]
9706	ULK2	unc-51 like autophagy activating kinase 2 [Source:HGNC Symbol;Acc:HGNC:13480]
9719	ADAMTSL2	ADAMTS like 2 [Source:HGNC Symbol;Acc:HGNC:14631]
9722	NOS1AP	nitric oxide synthase 1 adaptor protein [Source:HGNC Symbol;Acc:HGNC:16859]
9725	TMEM63A	transmembrane protein 63A [Source:HGNC Symbol;Acc:HGNC:29118]
9779	TBC1D5	TBC1 domain family member 5 [Source:HGNC Symbol;Acc:HGNC:19166]
9791	PTDSS1	phosphatidylserine synthase 1 [Source:HGNC Symbol;Acc:HGNC:9587]
9823	ARMCX2	armadillo repeat containing X-linked 2 [Source:HGNC Symbol;Acc:HGNC:16869]
9869	SETDB1	SET domain bifurcated histone lysine methyltransferase 1 [Source:HGNC Symbol;Acc:HGNC:10761]
9882	TBC1D4	TBC1 domain family member 4 [Source:HGNC Symbol;Acc:HGNC:19165]
9897	WASHC5	WASH complex subunit 5 [Source:HGNC Symbol;Acc:HGNC:28984]
9904	RBM19	RNA binding motif protein 19 [Source:HGNC Symbol;Acc:HGNC:29098]
9923	ZBTB40	zinc finger and BTB domain containing 40 [Source:HGNC Symbol;Acc:HGNC:29045]
9980	DOP1B	DOP1 leucine zipper like protein B [Source:HGNC Symbol;Acc:HGNC:1291]

## Sheet: KP1-GFP liver colonies in C57B6
Gene Set Name	# Genes in Gene Set (K)	Description	# Genes in Overlap (k)	k/K	p-value	FDR q-value
HALLMARK_DNA_REPAIR	150	Genes involved in DNA repair.	20	0.1333	1.56e-09	7.82e-08
HALLMARK_MYC_TARGETS_V1	200	A subgroup of genes regulated by MYC - version 1 (v1).	21	0.105	4.58e-08	1.14e-06
HALLMARK_G2M_CHECKPOINT	200	Genes involved in the G2/M checkpoint, as in progression through the cell division cycle.	20	0.1	2.12e-07	3.53e-06
HALLMARK_ADIPOGENESIS	200	Genes up-regulated during adipocyte differentiation (adipogenesis).	19	0.095	9.3e-07	7.75e-06
HALLMARK_OXIDATIVE_PHOSPHORYLATION	200	Genes encoding proteins involved in oxidative phosphorylation.	19	0.095	9.3e-07	7.75e-06
HALLMARK_P53_PATHWAY	200	Genes involved in p53 pathways and networks.	19	0.095	9.3e-07	7.75e-06
HALLMARK_E2F_TARGETS	200	Genes encoding cell cycle related targets of E2F transcription factors.	17	0.085	1.51e-05	0.000108
HALLMARK_MITOTIC_SPINDLE	199	Genes important for mitotic spindle assembly.	16	0.0804	5.23e-05	0.000309
HALLMARK_GLYCOLYSIS	200	Genes encoding proteins involved in glycolysis and gluconeogenesis.	16	0.08	5.56e-05	0.000309
HALLMARK_MYC_TARGETS_V2	58	A subgroup of genes regulated by MYC - version 2 (v2).	8	0.1379	0.000102	0.000511
HALLMARK_UV_RESPONSE_UP	158	Genes up-regulated in response to ultraviolet (UV) radiation.	13	0.0823	0.000204	0.000922
HALLMARK_REACTIVE_OXYGEN_SPECIES_PATHWAY	49	Genes up-regulated by reactive oxigen species (ROS).	7	0.1429	0.000221	0.000922
HALLMARK_PEROXISOME	104	Genes encoding components of peroxisome.	10	0.0962	0.000314	0.00121
HALLMARK_HEME_METABOLISM	200	Genes involved in metabolism of heme (a cofactor consisting of iron and porphyrin) and erythroblast differentiation.	14	0.07	0.000619	0.00206
HALLMARK_XENOBIOTIC_METABOLISM	200	Genes encoding proteins involved in processing of drugs and other xenobiotics.	14	0.07	0.000619	0.00206
HALLMARK_HYPOXIA	200	Genes up-regulated in response to low oxygen levels (hypoxia).	13	0.065	0.00186	0.00582
HALLMARK_UNFOLDED_PROTEIN_RESPONSE	113	Genes up-regulated during unfolded protein response, a cellular stress response related to the endoplasmic reticulum.	9	0.0796	0.00235	0.00691
Gene/Gene Set Overlap Matrix
Entrez Gene Id	Gene Symbol	Gene Description	HALLMARK_DNA_REPAIR	HALLMARK_MYC_TARGETS_V1	HALLMARK_G2M_CHECKPOINT	HALLMARK_ADIPOGENESIS	HALLMARK_OXIDATIVE_PHOSPHORYLATION	HALLMARK_P53_PATHWAY	HALLMARK_E2F_TARGETS	HALLMARK_MITOTIC_SPINDLE	HALLMARK_GLYCOLYSIS	HALLMARK_MYC_TARGETS_V2	HALLMARK_UV_RESPONSE_UP	HALLMARK_REACTIVE_OXYGEN_SPECIES_PATHWAY	HALLMARK_PEROXISOME	HALLMARK_HEME_METABOLISM	HALLMARK_XENOBIOTIC_METABOLISM	HALLMARK_HYPOXIA	HALLMARK_UNFOLDED_PROTEIN_RESPONSE
3615	IMPDH2	inosine monophosphate dehydrogenase 2 [Source:HGNC Symbol;Acc:HGNC:6053]	HALLMARK_DNA_REPAIR	HALLMARK_MYC_TARGETS_V1
23649	POLA2	DNA polymerase alpha 2, accessory subunit [Source:HGNC Symbol;Acc:HGNC:30073]	HALLMARK_DNA_REPAIR		HALLMARK_G2M_CHECKPOINT				HALLMARK_E2F_TARGETS
100	ADA	adenosine deaminase [Source:HGNC Symbol;Acc:HGNC:186]	HALLMARK_DNA_REPAIR					HALLMARK_P53_PATHWAY
1643	DDB2	damage specific DNA binding protein 2 [Source:HGNC Symbol;Acc:HGNC:2718]	HALLMARK_DNA_REPAIR					HALLMARK_P53_PATHWAY
29927	SEC61A1	Sec61 translocon alpha 1 subunit [Source:HGNC Symbol;Acc:HGNC:18276]	HALLMARK_DNA_REPAIR					HALLMARK_P53_PATHWAY
5437	POLR2H	RNA polymerase II subunit H [Source:HGNC Symbol;Acc:HGNC:9195]	HALLMARK_DNA_REPAIR										HALLMARK_UV_RESPONSE_UP
978	CDA	cytidine deaminase [Source:HGNC Symbol;Acc:HGNC:1712]	HALLMARK_DNA_REPAIR														HALLMARK_XENOBIOTIC_METABOLISM
9328	GTF3C5	general transcription factor IIIC subunit 5 [Source:HGNC Symbol;Acc:HGNC:4668]	HALLMARK_DNA_REPAIR
10289	EIF1B	eukaryotic translation initiation factor 1B [Source:HGNC Symbol;Acc:HGNC:30792]	HALLMARK_DNA_REPAIR
25920	NELFB	negative elongation factor complex member B [Source:HGNC Symbol;Acc:HGNC:24324]	HALLMARK_DNA_REPAIR
27343	POLL	DNA polymerase lambda [Source:HGNC Symbol;Acc:HGNC:9184]	HALLMARK_DNA_REPAIR
2958	GTF2A2	general transcription factor IIA subunit 2 [Source:HGNC Symbol;Acc:HGNC:4647]	HALLMARK_DNA_REPAIR
4350	MPG	N-methylpurine DNA glycosylase [Source:HGNC Symbol;Acc:HGNC:7211]	HALLMARK_DNA_REPAIR
4799	NFX1	nuclear transcription factor, X-box binding 1 [Source:HGNC Symbol;Acc:HGNC:7803]	HALLMARK_DNA_REPAIR
4833	NME4	NME/NM23 nucleoside diphosphate kinase 4 [Source:HGNC Symbol;Acc:HGNC:7852]	HALLMARK_DNA_REPAIR
51292	GMPR2	guanosine monophosphate reductase 2 [Source:HGNC Symbol;Acc:HGNC:4377]	HALLMARK_DNA_REPAIR
5433	POLR2D	RNA polymerase II subunit D [Source:HGNC Symbol;Acc:HGNC:9191]	HALLMARK_DNA_REPAIR
5438	POLR2I	RNA polymerase II subunit I [Source:HGNC Symbol;Acc:HGNC:9196]	HALLMARK_DNA_REPAIR
8178	ELL	elongation factor for RNA polymerase II [Source:HGNC Symbol;Acc:HGNC:23114]	HALLMARK_DNA_REPAIR
8731	RNMT	RNA guanine-7 methyltransferase [Source:HGNC Symbol;Acc:HGNC:10075]	HALLMARK_DNA_REPAIR
9221	NOLC1	nucleolar and coiled-body phosphoprotein 1 [Source:HGNC Symbol;Acc:HGNC:15608]		HALLMARK_MYC_TARGETS_V1	HALLMARK_G2M_CHECKPOINT				HALLMARK_E2F_TARGETS			HALLMARK_MYC_TARGETS_V2							HALLMARK_UNFOLDED_PROTEIN_RESPONSE
4174	MCM5	minichromosome maintenance complex component 5 [Source:HGNC Symbol;Acc:HGNC:6948]		HALLMARK_MYC_TARGETS_V1	HALLMARK_G2M_CHECKPOINT				HALLMARK_E2F_TARGETS			HALLMARK_MYC_TARGETS_V2
6599	SMARCC1	SWI/SNF related, matrix associated, actin dependent regulator of chromatin subfamily c member 1 [Source:HGNC Symbol;Acc:HGNC:11104]		HALLMARK_MYC_TARGETS_V1	HALLMARK_G2M_CHECKPOINT										HALLMARK_PEROXISOME
2806	GOT2	glutamic-oxaloacetic transaminase 2 [Source:HGNC Symbol;Acc:HGNC:4433]		HALLMARK_MYC_TARGETS_V1			HALLMARK_OXIDATIVE_PHOSPHORYLATION				HALLMARK_GLYCOLYSIS
6723	SRM	spermidine synthase [Source:HGNC Symbol;Acc:HGNC:11296]		HALLMARK_MYC_TARGETS_V1								HALLMARK_MYC_TARGETS_V2
7965	AIMP2	aminoacyl tRNA synthetase complex interacting multifunctional protein 2 [Source:HGNC Symbol;Acc:HGNC:20609]		HALLMARK_MYC_TARGETS_V1								HALLMARK_MYC_TARGETS_V2
7555	CNBP	CCHC-type zinc finger nucleic acid binding protein [Source:HGNC Symbol;Acc:HGNC:13164]		HALLMARK_MYC_TARGETS_V1											HALLMARK_PEROXISOME
3376	IARS	isoleucyl-tRNA synthetase [Source:HGNC Symbol;Acc:HGNC:5330]		HALLMARK_MYC_TARGETS_V1															HALLMARK_UNFOLDED_PROTEIN_RESPONSE
6059	ABCE1	ATP binding cassette subfamily E member 1 [Source:HGNC Symbol;Acc:HGNC:69]		HALLMARK_MYC_TARGETS_V1
3066	HDAC2	histone deacetylase 2 [Source:HGNC Symbol;Acc:HGNC:4853]		HALLMARK_MYC_TARGETS_V1
1207	CLNS1A	chloride nucleotide-sensitive channel 1A [Source:HGNC Symbol;Acc:HGNC:2080]		HALLMARK_MYC_TARGETS_V1
23016	EXOSC7	exosome component 7 [Source:HGNC Symbol;Acc:HGNC:28112]		HALLMARK_MYC_TARGETS_V1
23435	TARDBP	TAR DNA binding protein [Source:HGNC Symbol;Acc:HGNC:11571]		HALLMARK_MYC_TARGETS_V1
26135	SERBP1	SERPINE1 mRNA binding protein 1 [Source:HGNC Symbol;Acc:HGNC:17860]		HALLMARK_MYC_TARGETS_V1
2739	GLO1	glyoxalase I [Source:HGNC Symbol;Acc:HGNC:4323]		HALLMARK_MYC_TARGETS_V1
3181	HNRNPA2B1	heterogeneous nuclear ribonucleoprotein A2/B1 [Source:HGNC Symbol;Acc:HGNC:5033]		HALLMARK_MYC_TARGETS_V1
5496	PPM1G	protein phosphatase, Mg2+/Mn2+ dependent 1G [Source:HGNC Symbol;Acc:HGNC:9278]		HALLMARK_MYC_TARGETS_V1
5707	PSMD1	proteasome 26S subunit, non-ATPase 1 [Source:HGNC Symbol;Acc:HGNC:9554]		HALLMARK_MYC_TARGETS_V1
6627	SNRPA1	small nuclear ribonucleoprotein polypeptide A' [Source:HGNC Symbol;Acc:HGNC:11152]		HALLMARK_MYC_TARGETS_V1
790	CAD	carbamoyl-phosphate synthetase 2, aspartate transcarbamylase, and dihydroorotase [Source:HGNC Symbol;Acc:HGNC:1424]		HALLMARK_MYC_TARGETS_V1
1031	CDKN2C	cyclin dependent kinase inhibitor 2C [Source:HGNC Symbol;Acc:HGNC:1789]			HALLMARK_G2M_CHECKPOINT	HALLMARK_ADIPOGENESIS			HALLMARK_E2F_TARGETS
1163	CKS1B	CDC28 protein kinase regulatory subunit 1B [Source:HGNC Symbol;Acc:HGNC:19083]			HALLMARK_G2M_CHECKPOINT				HALLMARK_E2F_TARGETS										HALLMARK_UNFOLDED_PROTEIN_RESPONSE
10460	TACC3	transforming acidic coiled-coil containing protein 3 [Source:HGNC Symbol;Acc:HGNC:11524]			HALLMARK_G2M_CHECKPOINT				HALLMARK_E2F_TARGETS
23594	ORC6	origin recognition complex subunit 6 [Source:HGNC Symbol;Acc:HGNC:17151]			HALLMARK_G2M_CHECKPOINT				HALLMARK_E2F_TARGETS
6839	SUV39H1	suppressor of variegation 3-9 homolog 1 [Source:HGNC Symbol;Acc:HGNC:11479]			HALLMARK_G2M_CHECKPOINT				HALLMARK_E2F_TARGETS
9232	PTTG1	PTTG1 regulator of sister chromatid separation, securin [Source:HGNC Symbol;Acc:HGNC:9690]			HALLMARK_G2M_CHECKPOINT				HALLMARK_E2F_TARGETS
7272	TTK	TTK protein kinase [Source:HGNC Symbol;Acc:HGNC:12401]			HALLMARK_G2M_CHECKPOINT					HALLMARK_MITOTIC_SPINDLE
11104	KATNA1	katanin catalytic subunit A1 [Source:HGNC Symbol;Acc:HGNC:6216]			HALLMARK_G2M_CHECKPOINT					HALLMARK_MITOTIC_SPINDLE
22974	TPX2	TPX2 microtubule nucleation factor [Source:HGNC Symbol;Acc:HGNC:1249]			HALLMARK_G2M_CHECKPOINT					HALLMARK_MITOTIC_SPINDLE
26271	FBXO5	F-box protein 5 [Source:HGNC Symbol;Acc:HGNC:13584]			HALLMARK_G2M_CHECKPOINT					HALLMARK_MITOTIC_SPINDLE
1058	CENPA	centromere protein A [Source:HGNC Symbol;Acc:HGNC:1851]			HALLMARK_G2M_CHECKPOINT						HALLMARK_GLYCOLYSIS
1432	MAPK14	mitogen-activated protein kinase 14 [Source:HGNC Symbol;Acc:HGNC:6876]			HALLMARK_G2M_CHECKPOINT
899	CCNF	cyclin F [Source:HGNC Symbol;Acc:HGNC:1591]			HALLMARK_G2M_CHECKPOINT
5119	CHMP1A	charged multivesicular body protein 1A [Source:HGNC Symbol;Acc:HGNC:8740]			HALLMARK_G2M_CHECKPOINT
6760	AC091021.1	SS18 subunit of BAF chromatin remodeling complex [Source:NCBI gene;Acc:6760]			HALLMARK_G2M_CHECKPOINT
8452	CUL3	cullin 3 [Source:HGNC Symbol;Acc:HGNC:2553]			HALLMARK_G2M_CHECKPOINT
80273	GRPEL1	GrpE like 1, mitochondrial [Source:HGNC Symbol;Acc:HGNC:19696]				HALLMARK_ADIPOGENESIS	HALLMARK_OXIDATIVE_PHOSPHORYLATION						HALLMARK_UV_RESPONSE_UP
10449	ACAA2	acetyl-CoA acyltransferase 2 [Source:HGNC Symbol;Acc:HGNC:83]				HALLMARK_ADIPOGENESIS	HALLMARK_OXIDATIVE_PHOSPHORYLATION
10975	UQCR11	ubiquinol-cytochrome c reductase, complex III subunit XI [Source:HGNC Symbol;Acc:HGNC:30862]				HALLMARK_ADIPOGENESIS	HALLMARK_OXIDATIVE_PHOSPHORYLATION
29796	UQCR10	ubiquinol-cytochrome c reductase, complex III subunit X [Source:HGNC Symbol;Acc:HGNC:30863]				HALLMARK_ADIPOGENESIS	HALLMARK_OXIDATIVE_PHOSPHORYLATION
6390	SDHB	succinate dehydrogenase complex iron sulfur subunit B [Source:HGNC Symbol;Acc:HGNC:10681]				HALLMARK_ADIPOGENESIS	HALLMARK_OXIDATIVE_PHOSPHORYLATION
348	APOE	apolipoprotein E [Source:HGNC Symbol;Acc:HGNC:613]				HALLMARK_ADIPOGENESIS											HALLMARK_XENOBIOTIC_METABOLISM
123	PLIN2	perilipin 2 [Source:HGNC Symbol;Acc:HGNC:248]				HALLMARK_ADIPOGENESIS												HALLMARK_HYPOXIA
10113	PREB	prolactin regulatory element binding [Source:HGNC Symbol;Acc:HGNC:9356]				HALLMARK_ADIPOGENESIS													HALLMARK_UNFOLDED_PROTEIN_RESPONSE
3033	HADH	hydroxyacyl-CoA dehydrogenase [Source:HGNC Symbol;Acc:HGNC:4799]				HALLMARK_ADIPOGENESIS
5860	QDPR	quinoid dihydropteridine reductase [Source:HGNC Symbol;Acc:HGNC:9752]				HALLMARK_ADIPOGENESIS
1376	CPT2	carnitine palmitoyltransferase 2 [Source:HGNC Symbol;Acc:HGNC:2330]				HALLMARK_ADIPOGENESIS
25979	DHRS7B	dehydrogenase/reductase 7B [Source:HGNC Symbol;Acc:HGNC:24547]				HALLMARK_ADIPOGENESIS
29103	DNAJC15	DnaJ heat shock protein family (Hsp40) member C15 [Source:HGNC Symbol;Acc:HGNC:20325]				HALLMARK_ADIPOGENESIS
54996	MARC2	mitochondrial amidoxime reducing component 2 [Source:HGNC Symbol;Acc:HGNC:26064]				HALLMARK_ADIPOGENESIS
56894	AGPAT3	1-acylglycerol-3-phosphate O-acyltransferase 3 [Source:HGNC Symbol;Acc:HGNC:326]				HALLMARK_ADIPOGENESIS
57017	COQ9	coenzyme Q9 [Source:HGNC Symbol;Acc:HGNC:25302]				HALLMARK_ADIPOGENESIS
84274	COQ5	coenzyme Q5, methyltransferase [Source:HGNC Symbol;Acc:HGNC:28722]				HALLMARK_ADIPOGENESIS
977	CD151	CD151 molecule (Raph blood group) [Source:HGNC Symbol;Acc:HGNC:1630]				HALLMARK_ADIPOGENESIS
3945	LDHB	lactate dehydrogenase B [Source:HGNC Symbol;Acc:HGNC:6541]					HALLMARK_OXIDATIVE_PHOSPHORYLATION	HALLMARK_P53_PATHWAY
10128	LRPPRC	leucine rich pentatricopeptide repeat containing [Source:HGNC Symbol;Acc:HGNC:15714]					HALLMARK_OXIDATIVE_PHOSPHORYLATION			HALLMARK_MITOTIC_SPINDLE
528	ATP6V1C1	ATPase H+ transporting V1 subunit C1 [Source:HGNC Symbol;Acc:HGNC:856]					HALLMARK_OXIDATIVE_PHOSPHORYLATION						HALLMARK_UV_RESPONSE_UP
3032	HADHB	hydroxyacyl-CoA dehydrogenase trifunctional multienzyme complex subunit beta [Source:HGNC Symbol;Acc:HGNC:4803]					HALLMARK_OXIDATIVE_PHOSPHORYLATION
1345	COX6C	cytochrome c oxidase subunit 6C [Source:HGNC Symbol;Acc:HGNC:2285]					HALLMARK_OXIDATIVE_PHOSPHORYLATION
10884	MRPS30	mitochondrial ribosomal protein S30 [Source:HGNC Symbol;Acc:HGNC:8769]					HALLMARK_OXIDATIVE_PHOSPHORYLATION
23203	PMPCA	peptidase, mitochondrial processing alpha subunit [Source:HGNC Symbol;Acc:HGNC:18667]					HALLMARK_OXIDATIVE_PHOSPHORYLATION
26521	TIMM8B	translocase of inner mitochondrial membrane 8 homolog B [Source:HGNC Symbol;Acc:HGNC:11818]					HALLMARK_OXIDATIVE_PHOSPHORYLATION
4695	NDUFA2	NADH:ubiquinone oxidoreductase subunit A2 [Source:HGNC Symbol;Acc:HGNC:7685]					HALLMARK_OXIDATIVE_PHOSPHORYLATION
4712	NDUFB6	NADH:ubiquinone oxidoreductase subunit B6 [Source:HGNC Symbol;Acc:HGNC:7701]					HALLMARK_OXIDATIVE_PHOSPHORYLATION
4719	NDUFS1	NADH:ubiquinone oxidoreductase core subunit S1 [Source:HGNC Symbol;Acc:HGNC:7707]					HALLMARK_OXIDATIVE_PHOSPHORYLATION
513	ATP5F1D	ATP synthase F1 subunit delta [Source:HGNC Symbol;Acc:HGNC:837]					HALLMARK_OXIDATIVE_PHOSPHORYLATION
8402	SLC25A11	solute carrier family 25 member 11 [Source:HGNC Symbol;Acc:HGNC:10981]					HALLMARK_OXIDATIVE_PHOSPHORYLATION
7832	BTG2	BTG anti-proliferation factor 2 [Source:HGNC Symbol;Acc:HGNC:1131]						HALLMARK_P53_PATHWAY					HALLMARK_UV_RESPONSE_UP			HALLMARK_HEME_METABOLISM
3265	HRAS	HRas proto-oncogene, GTPase [Source:HGNC Symbol;Acc:HGNC:5173]						HALLMARK_P53_PATHWAY							HALLMARK_PEROXISOME
51181	DCXR	dicarbonyl and L-xylulose reductase [Source:HGNC Symbol;Acc:HGNC:18985]						HALLMARK_P53_PATHWAY									HALLMARK_XENOBIOTIC_METABOLISM
4814	NINJ1	ninjurin 1 [Source:HGNC Symbol;Acc:HGNC:7824]						HALLMARK_P53_PATHWAY									HALLMARK_XENOBIOTIC_METABOLISM
26999	CYFIP2	cytoplasmic FMR1 interacting protein 2 [Source:HGNC Symbol;Acc:HGNC:13760]						HALLMARK_P53_PATHWAY									HALLMARK_XENOBIOTIC_METABOLISM
1649	DDIT3	DNA damage inducible transcript 3 [Source:HGNC Symbol;Acc:HGNC:2726]						HALLMARK_P53_PATHWAY										HALLMARK_HYPOXIA
8673	VAMP8	vesicle associated membrane protein 8 [Source:HGNC Symbol;Acc:HGNC:12647]						HALLMARK_P53_PATHWAY
25873	RPL36	ribosomal protein L36 [Source:HGNC Symbol;Acc:HGNC:13631]						HALLMARK_P53_PATHWAY
3275	PRMT2	protein arginine methyltransferase 2 [Source:HGNC Symbol;Acc:HGNC:5186]						HALLMARK_P53_PATHWAY
4193	MDM2	MDM2 proto-oncogene [Source:HGNC Symbol;Acc:HGNC:6973]						HALLMARK_P53_PATHWAY
51768	TM7SF3	transmembrane 7 superfamily member 3 [Source:HGNC Symbol;Acc:HGNC:23049]						HALLMARK_P53_PATHWAY
5564	PRKAB1	protein kinase AMP-activated non-catalytic subunit beta 1 [Source:HGNC Symbol;Acc:HGNC:9378]						HALLMARK_P53_PATHWAY
6206	RPS12	ribosomal protein S12 [Source:HGNC Symbol;Acc:HGNC:10385]						HALLMARK_P53_PATHWAY
63874	ABHD4	abhydrolase domain containing 4 [Source:HGNC Symbol;Acc:HGNC:20154]						HALLMARK_P53_PATHWAY
64782	AEN	apoptosis enhancing nuclease [Source:HGNC Symbol;Acc:HGNC:25722]						HALLMARK_P53_PATHWAY
5631	PRPS1	phosphoribosyl pyrophosphate synthetase 1 [Source:HGNC Symbol;Acc:HGNC:9462]							HALLMARK_E2F_TARGETS		HALLMARK_GLYCOLYSIS
197335	WDR90	WD repeat domain 90 [Source:HGNC Symbol;Acc:HGNC:26960]							HALLMARK_E2F_TARGETS
23468	CBX5	chromobox 5 [Source:HGNC Symbol;Acc:HGNC:1555]							HALLMARK_E2F_TARGETS
29893	PSMC3IP	PSMC3 interacting protein [Source:HGNC Symbol;Acc:HGNC:17928]							HALLMARK_E2F_TARGETS
55148	UBR7	ubiquitin protein ligase E3 component n-recognin 7 (putative) [Source:HGNC Symbol;Acc:HGNC:20344]							HALLMARK_E2F_TARGETS
57405	SPC25	SPC25 component of NDC80 kinetochore complex [Source:HGNC Symbol;Acc:HGNC:24031]							HALLMARK_E2F_TARGETS
64785	GINS3	GINS complex subunit 3 [Source:HGNC Symbol;Acc:HGNC:25851]							HALLMARK_E2F_TARGETS
7884	SLBP	stem-loop binding protein [Source:HGNC Symbol;Acc:HGNC:10904]							HALLMARK_E2F_TARGETS
10160	FARP1	FERM, ARH/RhoGEF and pleckstrin domain protein 1 [Source:HGNC Symbol;Acc:HGNC:3591]								HALLMARK_MITOTIC_SPINDLE
396	ARHGDIA	Rho GDP dissociation inhibitor alpha [Source:HGNC Symbol;Acc:HGNC:678]								HALLMARK_MITOTIC_SPINDLE
8476	CDC42BPA	CDC42 binding protein kinase alpha [Source:HGNC Symbol;Acc:HGNC:1737]								HALLMARK_MITOTIC_SPINDLE
10300	KATNB1	katanin regulatory subunit B1 [Source:HGNC Symbol;Acc:HGNC:6217]								HALLMARK_MITOTIC_SPINDLE
10844	TUBGCP2	tubulin gamma complex associated protein 2 [Source:HGNC Symbol;Acc:HGNC:18599]								HALLMARK_MITOTIC_SPINDLE
23192	ATG4B	autophagy related 4B cysteine peptidase [Source:HGNC Symbol;Acc:HGNC:20790]								HALLMARK_MITOTIC_SPINDLE
55201	MAP1S	microtubule associated protein 1S [Source:HGNC Symbol;Acc:HGNC:15715]								HALLMARK_MITOTIC_SPINDLE
55755	CDK5RAP2	CDK5 regulatory subunit associated protein 2 [Source:HGNC Symbol;Acc:HGNC:18672]								HALLMARK_MITOTIC_SPINDLE
6904	TBCD	tubulin folding cofactor D [Source:HGNC Symbol;Acc:HGNC:11581]								HALLMARK_MITOTIC_SPINDLE
8409	UXT	ubiquitously expressed prefoldin like chaperone [Source:HGNC Symbol;Acc:HGNC:12641]								HALLMARK_MITOTIC_SPINDLE
9793	CKAP5	cytoskeleton associated protein 5 [Source:HGNC Symbol;Acc:HGNC:28959]								HALLMARK_MITOTIC_SPINDLE
5214	PFKP	phosphofructokinase, platelet [Source:HGNC Symbol;Acc:HGNC:8878]									HALLMARK_GLYCOLYSIS			HALLMARK_REACTIVE_OXYGEN_SPECIES_PATHWAY				HALLMARK_HYPOXIA
2539	G6PD	glucose-6-phosphate dehydrogenase [Source:HGNC Symbol;Acc:HGNC:4057]									HALLMARK_GLYCOLYSIS			HALLMARK_REACTIVE_OXYGEN_SPECIES_PATHWAY
726	CAPN5	calpain 5 [Source:HGNC Symbol;Acc:HGNC:1482]									HALLMARK_GLYCOLYSIS
10456	HAX1	HCLS1 associated protein X-1 [Source:HGNC Symbol;Acc:HGNC:16915]									HALLMARK_GLYCOLYSIS
5917	RARS	arginyl-tRNA synthetase [Source:HGNC Symbol;Acc:HGNC:9870]									HALLMARK_GLYCOLYSIS
10020	GNE	glucosamine (UDP-N-acetyl)-2-epimerase/N-acetylmannosamine kinase [Source:HGNC Symbol;Acc:HGNC:23657]									HALLMARK_GLYCOLYSIS
1365	CLDN3	claudin 3 [Source:HGNC Symbol;Acc:HGNC:2045]									HALLMARK_GLYCOLYSIS
4731	NDUFV3	NADH:ubiquinone oxidoreductase subunit V3 [Source:HGNC Symbol;Acc:HGNC:7719]									HALLMARK_GLYCOLYSIS
51728	POLR3K	RNA polymerase III subunit K [Source:HGNC Symbol;Acc:HGNC:14121]									HALLMARK_GLYCOLYSIS
5315	PKM	pyruvate kinase M1/2 [Source:HGNC Symbol;Acc:HGNC:9021]									HALLMARK_GLYCOLYSIS
5373	PMM2	phosphomannomutase 2 [Source:HGNC Symbol;Acc:HGNC:9115]									HALLMARK_GLYCOLYSIS
5834	PYGB	glycogen phosphorylase B [Source:HGNC Symbol;Acc:HGNC:9723]									HALLMARK_GLYCOLYSIS
8996	AC074143.1	nucleolar protein 3 [Source:NCBI gene;Acc:8996]									HALLMARK_GLYCOLYSIS
27346	TMEM97	transmembrane protein 97 [Source:HGNC Symbol;Acc:HGNC:28106]										HALLMARK_MYC_TARGETS_V2					HALLMARK_XENOBIOTIC_METABOLISM
23223	RRP12	ribosomal RNA processing 12 homolog [Source:HGNC Symbol;Acc:HGNC:29100]										HALLMARK_MYC_TARGETS_V2
80324	PUS1	pseudouridine synthase 1 [Source:HGNC Symbol;Acc:HGNC:15508]										HALLMARK_MYC_TARGETS_V2
2193	FARSA	phenylalanyl-tRNA synthetase subunit alpha [Source:HGNC Symbol;Acc:HGNC:3592]										HALLMARK_MYC_TARGETS_V2
6535	SLC6A8	solute carrier family 6 member 8 [Source:HGNC Symbol;Acc:HGNC:11055]											HALLMARK_UV_RESPONSE_UP			HALLMARK_HEME_METABOLISM
682	BSG	basigin (Ok blood group) [Source:HGNC Symbol;Acc:HGNC:1116]											HALLMARK_UV_RESPONSE_UP			HALLMARK_HEME_METABOLISM
10439	OLFM1	olfactomedin 1 [Source:HGNC Symbol;Acc:HGNC:17187]											HALLMARK_UV_RESPONSE_UP
80777	CYB5B	cytochrome b5 type B [Source:HGNC Symbol;Acc:HGNC:24374]											HALLMARK_UV_RESPONSE_UP
1267	CNP	2',3'-cyclic nucleotide 3' phosphodiesterase [Source:HGNC Symbol;Acc:HGNC:2158]											HALLMARK_UV_RESPONSE_UP
1212	CLTB	clathrin light chain B [Source:HGNC Symbol;Acc:HGNC:2091]											HALLMARK_UV_RESPONSE_UP
1983	EIF5	eukaryotic translation initiation factor 5 [Source:HGNC Symbol;Acc:HGNC:3299]											HALLMARK_UV_RESPONSE_UP
4072	EPCAM	epithelial cell adhesion molecule [Source:HGNC Symbol;Acc:HGNC:11529]											HALLMARK_UV_RESPONSE_UP
51706	CYB5R1	cytochrome b5 reductase 1 [Source:HGNC Symbol;Acc:HGNC:13397]											HALLMARK_UV_RESPONSE_UP
1032	CDKN2D	cyclin dependent kinase inhibitor 2D [Source:HGNC Symbol;Acc:HGNC:1790]												HALLMARK_REACTIVE_OXYGEN_SPECIES_PATHWAY
112398	EGLN2	egl-9 family hypoxia inducible factor 2 [Source:HGNC Symbol;Acc:HGNC:14660]												HALLMARK_REACTIVE_OXYGEN_SPECIES_PATHWAY
4155	MBP	myelin basic protein [Source:HGNC Symbol;Acc:HGNC:6925]												HALLMARK_REACTIVE_OXYGEN_SPECIES_PATHWAY
5524	PTPA	protein phosphatase 2 phosphatase activator [Source:HGNC Symbol;Acc:HGNC:9308]												HALLMARK_REACTIVE_OXYGEN_SPECIES_PATHWAY
9124	PDLIM1	PDZ and LIM domain 1 [Source:HGNC Symbol;Acc:HGNC:2067]												HALLMARK_REACTIVE_OXYGEN_SPECIES_PATHWAY
3295	HSD17B4	hydroxysteroid 17-beta dehydrogenase 4 [Source:HGNC Symbol;Acc:HGNC:5213]													HALLMARK_PEROXISOME
5190	PEX6	peroxisomal biogenesis factor 6 [Source:HGNC Symbol;Acc:HGNC:8859]													HALLMARK_PEROXISOME
83752	LONP2	lon peptidase 2, peroxisomal [Source:HGNC Symbol;Acc:HGNC:20598]													HALLMARK_PEROXISOME
706	TSPO	translocator protein [Source:HGNC Symbol;Acc:HGNC:1158]													HALLMARK_PEROXISOME
390916	NUDT19	nudix hydrolase 19 [Source:HGNC Symbol;Acc:HGNC:32036]													HALLMARK_PEROXISOME
51024	FIS1	fission, mitochondrial 1 [Source:HGNC Symbol;Acc:HGNC:21689]													HALLMARK_PEROXISOME
60386	SLC25A19	solute carrier family 25 member 19 [Source:HGNC Symbol;Acc:HGNC:14409]													HALLMARK_PEROXISOME
9663	LPIN2	lipin 2 [Source:HGNC Symbol;Acc:HGNC:14450]														HALLMARK_HEME_METABOLISM	HALLMARK_XENOBIOTIC_METABOLISM
8833	GMPS	guanine monophosphate synthase [Source:HGNC Symbol;Acc:HGNC:4378]														HALLMARK_HEME_METABOLISM
644	BLVRA	biliverdin reductase A [Source:HGNC Symbol;Acc:HGNC:1062]														HALLMARK_HEME_METABOLISM
1508	CTSB	cathepsin B [Source:HGNC Symbol;Acc:HGNC:2527]														HALLMARK_HEME_METABOLISM
669	BPGM	bisphosphoglycerate mutase [Source:HGNC Symbol;Acc:HGNC:1093]														HALLMARK_HEME_METABOLISM
129642	MBOAT2	membrane bound O-acyltransferase domain containing 2 [Source:HGNC Symbol;Acc:HGNC:25193]														HALLMARK_HEME_METABOLISM
26502	NARF	nuclear prelamin A recognition factor [Source:HGNC Symbol;Acc:HGNC:29916]														HALLMARK_HEME_METABOLISM
3029	HAGH	hydroxyacylglutathione hydrolase [Source:HGNC Symbol;Acc:HGNC:4805]														HALLMARK_HEME_METABOLISM
51094	ADIPOR1	adiponectin receptor 1 [Source:HGNC Symbol;Acc:HGNC:24040]														HALLMARK_HEME_METABOLISM
63891	RNF123	ring finger protein 123 [Source:HGNC Symbol;Acc:HGNC:21148]														HALLMARK_HEME_METABOLISM
9091	PIGQ	phosphatidylinositol glycan anchor biosynthesis class Q [Source:HGNC Symbol;Acc:HGNC:14135]														HALLMARK_HEME_METABOLISM
2192	FBLN1	fibulin 1 [Source:HGNC Symbol;Acc:HGNC:3600]															HALLMARK_XENOBIOTIC_METABOLISM
5950	RBP4	retinol binding protein 4 [Source:HGNC Symbol;Acc:HGNC:9922]															HALLMARK_XENOBIOTIC_METABOLISM
23564	DDAH2	dimethylarginine dimethylaminohydrolase 2 [Source:HGNC Symbol;Acc:HGNC:2716]															HALLMARK_XENOBIOTIC_METABOLISM
2937	GSS	glutathione synthetase [Source:HGNC Symbol;Acc:HGNC:4624]															HALLMARK_XENOBIOTIC_METABOLISM
5730	PTGDS	prostaglandin D2 synthase [Source:HGNC Symbol;Acc:HGNC:9592]															HALLMARK_XENOBIOTIC_METABOLISM
57406	ABHD6	abhydrolase domain containing 6 [Source:HGNC Symbol;Acc:HGNC:21398]															HALLMARK_XENOBIOTIC_METABOLISM
9361	LONP1	lon peptidase 1, mitochondrial [Source:HGNC Symbol;Acc:HGNC:9479]															HALLMARK_XENOBIOTIC_METABOLISM
633	BGN	biglycan [Source:HGNC Symbol;Acc:HGNC:1044]																HALLMARK_HYPOXIA
2027	ENO3	enolase 3 [Source:HGNC Symbol;Acc:HGNC:3354]																HALLMARK_HYPOXIA
9380	GRHPR	glyoxylate and hydroxypyruvate reductase [Source:HGNC Symbol;Acc:HGNC:4570]																HALLMARK_HYPOXIA
230	ALDOC	aldolase, fructose-bisphosphate C [Source:HGNC Symbol;Acc:HGNC:418]																HALLMARK_HYPOXIA
10994	ILVBL	ilvB acetolactate synthase like [Source:HGNC Symbol;Acc:HGNC:6041]																HALLMARK_HYPOXIA
1466	CSRP2	cysteine and glycine rich protein 2 [Source:HGNC Symbol;Acc:HGNC:2470]																HALLMARK_HYPOXIA
25819	NOCT	nocturnin [Source:HGNC Symbol;Acc:HGNC:14254]																HALLMARK_HYPOXIA
3073	HEXA	hexosaminidase subunit alpha [Source:HGNC Symbol;Acc:HGNC:4878]																HALLMARK_HYPOXIA
55577	NAGK	N-acetylglucosamine kinase [Source:HGNC Symbol;Acc:HGNC:17174]																HALLMARK_HYPOXIA
8509	NDST2	N-deacetylase and N-sulfotransferase 2 [Source:HGNC Symbol;Acc:HGNC:7681]																HALLMARK_HYPOXIA
10775	POP4	POP4 homolog, ribonuclease P/MRP subunit [Source:HGNC Symbol;Acc:HGNC:30081]																	HALLMARK_UNFOLDED_PROTEIN_RESPONSE
10897	YIF1A	Yip1 interacting factor homolog A, membrane trafficking protein [Source:HGNC Symbol;Acc:HGNC:16688]																	HALLMARK_UNFOLDED_PROTEIN_RESPONSE
1639	DCTN1	dynactin subunit 1 [Source:HGNC Symbol;Acc:HGNC:2711]																	HALLMARK_UNFOLDED_PROTEIN_RESPONSE
23517	MTREX	Mtr4 exosome RNA helicase [Source:HGNC Symbol;Acc:HGNC:18734]																	HALLMARK_UNFOLDED_PROTEIN_RESPONSE
55466	DNAJA4	DnaJ heat shock protein family (Hsp40) member A4 [Source:HGNC Symbol;Acc:HGNC:14885]																	HALLMARK_UNFOLDED_PROTEIN_RESPONSE
5603	MAPK13	mitogen-activated protein kinase 13 [Source:HGNC Symbol;Acc:HGNC:6875]
2593	GAMT	guanidinoacetate N-methyltransferase [Source:HGNC Symbol;Acc:HGNC:4136]
10109	ARPC2	actin related protein 2/3 complex subunit 2 [Source:HGNC Symbol;Acc:HGNC:705]
26119	LDLRAP1	low density lipoprotein receptor adaptor protein 1 [Source:HGNC Symbol;Acc:HGNC:18640]
5600	MAPK11	mitogen-activated protein kinase 11 [Source:HGNC Symbol;Acc:HGNC:6873]
57863	CADM3	cell adhesion molecule 3 [Source:HGNC Symbol;Acc:HGNC:17601]
5819	NECTIN2	nectin cell adhesion molecule 2 [Source:HGNC Symbol;Acc:HGNC:9707]
7073	TIAL1	TIA1 cytotoxic granule associated RNA binding protein like 1 [Source:HGNC Symbol;Acc:HGNC:11804]
7791	ZYX	zyxin [Source:HGNC Symbol;Acc:HGNC:13200]
1281	COL3A1	collagen type III alpha 1 chain [Source:HGNC Symbol;Acc:HGNC:2201]
6678	SPARC	secreted protein acidic and cysteine rich [Source:HGNC Symbol;Acc:HGNC:11219]
1278	COL1A2	collagen type I alpha 2 chain [Source:HGNC Symbol;Acc:HGNC:2198]
4256	MGP	matrix Gla protein [Source:HGNC Symbol;Acc:HGNC:7060]
5479	PPIB	peptidylprolyl isomerase B [Source:HGNC Symbol;Acc:HGNC:9255]
79709	COLGALT1	collagen beta(1-O)galactosyltransferase 1 [Source:HGNC Symbol;Acc:HGNC:26182]
800	CALD1	caldesmon 1 [Source:HGNC Symbol;Acc:HGNC:1441]
813	CALU	calumenin [Source:HGNC Symbol;Acc:HGNC:1458]
8985	PLOD3	procollagen-lysine,2-oxoglutarate 5-dioxygenase 3 [Source:HGNC Symbol;Acc:HGNC:9083]
11057	ABHD2	abhydrolase domain containing 2 [Source:HGNC Symbol;Acc:HGNC:18717]
55540	IL17RB	interleukin 17 receptor B [Source:HGNC Symbol;Acc:HGNC:18015]
29107	NXT1	nuclear transport factor 2 like export factor 1 [Source:HGNC Symbol;Acc:HGNC:15913]
3705	ITPK1	inositol-tetrakisphosphate 1-kinase [Source:HGNC Symbol;Acc:HGNC:6177]
3856	KRT8	keratin 8 [Source:HGNC Symbol;Acc:HGNC:6446]
60436	TGIF2	TGFB induced factor homeobox 2 [Source:HGNC Symbol;Acc:HGNC:15764]
84187	TMEM164	transmembrane protein 164 [Source:HGNC Symbol;Acc:HGNC:26217]
9094	UNC119	unc-119 lipid binding chaperone [Source:HGNC Symbol;Acc:HGNC:12565]
8615	USO1	USO1 vesicle transport factor [Source:HGNC Symbol;Acc:HGNC:30904]
5684	PSMA3	proteasome subunit alpha 3 [Source:HGNC Symbol;Acc:HGNC:9532]
23062	GGA2	golgi associated, gamma adaptin ear containing, ARF binding protein 2 [Source:HGNC Symbol;Acc:HGNC:16064]
2819	GPD1	glycerol-3-phosphate dehydrogenase 1 [Source:HGNC Symbol;Acc:HGNC:4455]
2947	GSTM3	glutathione S-transferase mu 3 [Source:HGNC Symbol;Acc:HGNC:4635]
29118	DDX25	DEAD-box helicase 25 [Source:HGNC Symbol;Acc:HGNC:18698]
4291	MLF1	myeloid leukemia factor 1 [Source:HGNC Symbol;Acc:HGNC:7125]
51686	OAZ3	ornithine decarboxylase antizyme 3 [Source:HGNC Symbol;Acc:HGNC:8097]
5884	RAD17	RAD17 checkpoint clamp loader component [Source:HGNC Symbol;Acc:HGNC:9807]
81570	CLPB	ClpB homolog, mitochondrial AAA ATPase chaperonin [Source:HGNC Symbol;Acc:HGNC:30664]
9489	PGS1	phosphatidylglycerophosphate synthase 1 [Source:HGNC Symbol;Acc:HGNC:30029]
4338	MOCS2	molybdenum cofactor synthesis 2 [Source:HGNC Symbol;Acc:HGNC:7193]
214	ALCAM	activated leukocyte cell adhesion molecule [Source:HGNC Symbol;Acc:HGNC:400]
23474	ETHE1	ETHE1 persulfide dioxygenase [Source:HGNC Symbol;Acc:HGNC:23287]
4047	LSS	lanosterol synthase [Source:HGNC Symbol;Acc:HGNC:6708]
23171	GPD1L	glycerol-3-phosphate dehydrogenase 1 like [Source:HGNC Symbol;Acc:HGNC:28956]
6728	SRP19	signal recognition particle 19 [Source:HGNC Symbol;Acc:HGNC:11300]
7520	XRCC5	X-ray repair cross complementing 5 [Source:HGNC Symbol;Acc:HGNC:12833]
4641	MYO1C	myosin IC [Source:HGNC Symbol;Acc:HGNC:7597]
221143	EEF1AKMT1	EEF1A lysine methyltransferase 1 [Source:HGNC Symbol;Acc:HGNC:27351]
51651	PTRH2	peptidyl-tRNA hydrolase 2 [Source:HGNC Symbol;Acc:HGNC:24265]
5269	SERPINB6	serpin family B member 6 [Source:HGNC Symbol;Acc:HGNC:8950]
6050	RNH1	ribonuclease/angiogenin inhibitor 1 [Source:HGNC Symbol;Acc:HGNC:10074]
1346	COX7A1	cytochrome c oxidase subunit 7A1 [Source:HGNC Symbol;Acc:HGNC:2287]
2281	FKBP1B	FKBP prolyl isomerase 1B [Source:HGNC Symbol;Acc:HGNC:3712]
3490	IGFBP7	insulin like growth factor binding protein 7 [Source:HGNC Symbol;Acc:HGNC:5476]
844	CASQ1	calsequestrin 1 [Source:HGNC Symbol;Acc:HGNC:1512]
3932	LCK	LCK proto-oncogene, Src family tyrosine kinase [Source:HGNC Symbol;Acc:HGNC:6524]
156	GRK2	G protein-coupled receptor kinase 2 [Source:HGNC Symbol;Acc:HGNC:289]
5947	RBP1	retinol binding protein 1 [Source:HGNC Symbol;Acc:HGNC:9919]
6574	SLC20A1	solute carrier family 20 member 1 [Source:HGNC Symbol;Acc:HGNC:10946]
8567	MADD	MAP kinase activating death domain [Source:HGNC Symbol;Acc:HGNC:6766]
4043	LRPAP1	LDL receptor related protein associated protein 1 [Source:HGNC Symbol;Acc:HGNC:6701]
1512	CTSH	cathepsin H [Source:HGNC Symbol;Acc:HGNC:2535]
2764	GMFB	glia maturation factor beta [Source:HGNC Symbol;Acc:HGNC:4373]
54331	GNG2	G protein subunit gamma 2 [Source:HGNC Symbol;Acc:HGNC:4404]
808	CALM3	calmodulin 3 [Source:HGNC Symbol;Acc:HGNC:1449]
553115	PEF1	penta-EF-hand domain containing 1 [Source:HGNC Symbol;Acc:HGNC:30009]
2319	FLOT2	flotillin 2 [Source:HGNC Symbol;Acc:HGNC:3758]
64750	SMURF2	SMAD specific E3 ubiquitin protein ligase 2 [Source:HGNC Symbol;Acc:HGNC:16809]
8729	GBF1	golgi brefeldin A resistant guanine nucleotide exchange factor 1 [Source:HGNC Symbol;Acc:HGNC:4181]
9554	SEC22B	SEC22 homolog B, vesicle trafficking protein (gene/pseudogene) [Source:HGNC Symbol;Acc:HGNC:10700]
972	CD74	CD74 molecule [Source:HGNC Symbol;Acc:HGNC:1697]
2842	GPR19	G protein-coupled receptor 19 [Source:HGNC Symbol;Acc:HGNC:4473]
55315	SLC29A3	solute carrier family 29 member 3 [Source:HGNC Symbol;Acc:HGNC:23096]
10806	SDCCAG8	serologically defined colon cancer antigen 8 [Source:HGNC Symbol;Acc:HGNC:10671]
11179	ZNF277	zinc finger protein 277 [Source:HGNC Symbol;Acc:HGNC:13070]
55365	TMEM176A	transmembrane protein 176A [Source:HGNC Symbol;Acc:HGNC:24930]
1318	SLC31A2	solute carrier family 31 member 2 [Source:HGNC Symbol;Acc:HGNC:11017]
24145	PANX1	pannexin 1 [Source:HGNC Symbol;Acc:HGNC:8599]
5122	PCSK1	proprotein convertase subtilisin/kexin type 1 [Source:HGNC Symbol;Acc:HGNC:8743]
113878	DTX2	deltex E3 ubiquitin ligase 2 [Source:HGNC Symbol;Acc:HGNC:15973]
100134934	TEN1	TEN1 subunit of CST complex [Source:HGNC Symbol;Acc:HGNC:37242]
100287171	WASHC1	WASH complex subunit 1 [Source:HGNC Symbol;Acc:HGNC:24361]
100528016	TMX2-CTNND1	TMX2-CTNND1 readthrough (NMD candidate) [Source:HGNC Symbol;Acc:HGNC:41992]
100533107	RTEL1-TNFRSF6B	RTEL1-TNFRSF6B readthrough (NMD candidate) [Source:HGNC Symbol;Acc:HGNC:44095]
10084	PQBP1	polyglutamine binding protein 1 [Source:HGNC Symbol;Acc:HGNC:9330]
100885850	PTGES3L-AARSD1	PTGES3L-AARSD1 readthrough [Source:HGNC Symbol;Acc:HGNC:43946]
100996939	PYURF	PIGY upstream reading frame [Source:HGNC Symbol;Acc:HGNC:44317]
10101	NUBP2	nucleotide binding protein 2 [Source:HGNC Symbol;Acc:HGNC:8042]
10120	ACTR1B	actin related protein 1B [Source:HGNC Symbol;Acc:HGNC:168]
10186	LHFPL6	LHFPL tetraspan subfamily member 6 [Source:HGNC Symbol;Acc:HGNC:6586]
10193	RNF41	ring finger protein 41 [Source:HGNC Symbol;Acc:HGNC:18401]
10198	MPHOSPH9	M-phase phosphoprotein 9 [Source:HGNC Symbol;Acc:HGNC:7215]
10229	COQ7	coenzyme Q7, hydroxylase [Source:HGNC Symbol;Acc:HGNC:2244]
10245	TIMM17B	translocase of inner mitochondrial membrane 17B [Source:HGNC Symbol;Acc:HGNC:17310]
10296	MAEA	macrophage erythroblast attacher [Source:HGNC Symbol;Acc:HGNC:13731]
10322	SMYD5	SMYD family member 5 [Source:HGNC Symbol;Acc:HGNC:16258]
10363	HMG20A	high mobility group 20A [Source:HGNC Symbol;Acc:HGNC:5001]
10369	CACNG2	calcium voltage-gated channel auxiliary subunit gamma 2 [Source:HGNC Symbol;Acc:HGNC:1406]
10391	CORO2B	coronin 2B [Source:HGNC Symbol;Acc:HGNC:2256]
10412	NSA2	NSA2 ribosome biogenesis factor [Source:HGNC Symbol;Acc:HGNC:30728]
10428	CFDP1	craniofacial development protein 1 [Source:HGNC Symbol;Acc:HGNC:1873]
10479	SLC9A6	solute carrier family 9 member A6 [Source:HGNC Symbol;Acc:HGNC:11079]
10488	CREB3	cAMP responsive element binding protein 3 [Source:HGNC Symbol;Acc:HGNC:2347]
10523	CHERP	calcium homeostasis endoplasmic reticulum protein [Source:HGNC Symbol;Acc:HGNC:16930]
10552	ARPC1A	actin related protein 2/3 complex subunit 1A [Source:HGNC Symbol;Acc:HGNC:703]
10556	RPP30	ribonuclease P/MRP subunit p30 [Source:HGNC Symbol;Acc:HGNC:17688]
10585	POMT1	protein O-mannosyltransferase 1 [Source:HGNC Symbol;Acc:HGNC:9202]
10641	NPRL2	NPR2 like, GATOR1 complex subunit [Source:HGNC Symbol;Acc:HGNC:24969]
10671	DCTN6	dynactin subunit 6 [Source:HGNC Symbol;Acc:HGNC:16964]
10695	CNPY3	canopy FGF signaling regulator 3 [Source:HGNC Symbol;Acc:HGNC:11968]
10768	AHCYL1	adenosylhomocysteinase like 1 [Source:HGNC Symbol;Acc:HGNC:344]
10893	MMP24	matrix metallopeptidase 24 [Source:HGNC Symbol;Acc:HGNC:7172]
10905	MAN1A2	mannosidase alpha class 1A member 2 [Source:HGNC Symbol;Acc:HGNC:6822]
10914	PAPOLA	poly(A) polymerase alpha [Source:HGNC Symbol;Acc:HGNC:14981]
10952	SEC61B	Sec61 translocon beta subunit [Source:HGNC Symbol;Acc:HGNC:16993]
10953	TOMM34	translocase of outer mitochondrial membrane 34 [Source:HGNC Symbol;Acc:HGNC:15746]
11000	SLC27A3	solute carrier family 27 member 3 [Source:HGNC Symbol;Acc:HGNC:10997]
11020	IFT27	intraflagellar transport 27 [Source:HGNC Symbol;Acc:HGNC:18626]
11034	DSTN	destrin, actin depolymerizing factor [Source:HGNC Symbol;Acc:HGNC:15750]
11070	TMEM115	transmembrane protein 115 [Source:HGNC Symbol;Acc:HGNC:30055]
11140	CDC37	cell division cycle 37 [Source:HGNC Symbol;Acc:HGNC:1735]
11169	WDHD1	WD repeat and HMG-box DNA binding protein 1 [Source:HGNC Symbol;Acc:HGNC:23170]
11198	SUPT16H	SPT16 homolog, facilitates chromatin remodeling subunit [Source:HGNC Symbol;Acc:HGNC:11465]
11224	RPL35	ribosomal protein L35 [Source:HGNC Symbol;Acc:HGNC:10344]
112752	IFT43	intraflagellar transport 43 [Source:HGNC Symbol;Acc:HGNC:29669]
11277	TREX1	three prime repair exonuclease 1 [Source:HGNC Symbol;Acc:HGNC:12269]
112812	FDX2	ferredoxin 2 [Source:HGNC Symbol;Acc:HGNC:30546]
11284	PNKP	polynucleotide kinase 3'-phosphatase [Source:HGNC Symbol;Acc:HGNC:9154]
112950	MED8	mediator complex subunit 8 [Source:HGNC Symbol;Acc:HGNC:19971]
113178	SCAMP4	secretory carrier membrane protein 4 [Source:HGNC Symbol;Acc:HGNC:30385]
11320	MGAT4A	alpha-1,3-mannosyl-glycoprotein 4-beta-N-acetylglucosaminyltransferase A [Source:HGNC Symbol;Acc:HGNC:7047]
11321	GPN1	GPN-loop GTPase 1 [Source:HGNC Symbol;Acc:HGNC:17030]
114790	STK11IP	serine/threonine kinase 11 interacting protein [Source:HGNC Symbol;Acc:HGNC:19184]
114827	FHAD1	forkhead associated phosphopeptide binding domain 1 [Source:HGNC Symbol;Acc:HGNC:29408]
114928	GPRASP2	G protein-coupled receptor associated sorting protein 2 [Source:HGNC Symbol;Acc:HGNC:25169]
114984	FLYWCH2	FLYWCH family member 2 [Source:HGNC Symbol;Acc:HGNC:25178]
115024	NT5C3B	5'-nucleotidase, cytosolic IIIB [Source:HGNC Symbol;Acc:HGNC:28300]
115106	HAUS1	HAUS augmin like complex subunit 1 [Source:HGNC Symbol;Acc:HGNC:25174]
115557	ARHGEF25	Rho guanine nucleotide exchange factor 25 [Source:HGNC Symbol;Acc:HGNC:30275]
118472	ZNF511	zinc finger protein 511 [Source:HGNC Symbol;Acc:HGNC:28445]
1192	CLIC1	chloride intracellular channel 1 [Source:HGNC Symbol;Acc:HGNC:2062]
119710	C11orf74	chromosome 11 open reading frame 74 [Source:HGNC Symbol;Acc:HGNC:25142]
1201	CLN3	CLN3 lysosomal/endosomal transmembrane protein, battenin [Source:HGNC Symbol;Acc:HGNC:2074]
120103	SLC36A4	solute carrier family 36 member 4 [Source:HGNC Symbol;Acc:HGNC:19660]
1209	CLPTM1	CLPTM1 regulator of GABA type A receptor forward trafficking [Source:HGNC Symbol;Acc:HGNC:2087]
123872	DNAAF1	dynein axonemal assembly factor 1 [Source:HGNC Symbol;Acc:HGNC:30539]
124222	PAQR4	progestin and adipoQ receptor family member 4 [Source:HGNC Symbol;Acc:HGNC:26386]
127253	TYW3	tRNA-yW synthesizing protein 3 homolog [Source:HGNC Symbol;Acc:HGNC:24757]
128061	C1orf131	chromosome 1 open reading frame 131 [Source:HGNC Symbol;Acc:HGNC:25332]
128977	C22orf39	chromosome 22 open reading frame 39 [Source:HGNC Symbol;Acc:HGNC:27012]
128989	TANGO2	transport and golgi organization 2 homolog [Source:HGNC Symbol;Acc:HGNC:25439]
129401	NUP35	nucleoporin 35 [Source:HGNC Symbol;Acc:HGNC:29797]
130574	LYPD6	LY6/PLAUR domain containing 6 [Source:HGNC Symbol;Acc:HGNC:28751]
132001	TAMM41	TAM41 mitochondrial translocator assembly and maintenance homolog [Source:HGNC Symbol;Acc:HGNC:25187]
133619	PRRC1	proline rich coiled-coil 1 [Source:HGNC Symbol;Acc:HGNC:28164]
138639	PTPDC1	protein tyrosine phosphatase domain containing 1 [Source:HGNC Symbol;Acc:HGNC:30184]
139728	PNCK	pregnancy up-regulated nonubiquitous CaM kinase [Source:HGNC Symbol;Acc:HGNC:13415]
140733	MACROD2	mono-ADP ribosylhydrolase 2 [Source:HGNC Symbol;Acc:HGNC:16126]
145173	B3GLCT	beta 3-glucosyltransferase [Source:HGNC Symbol;Acc:HGNC:20207]
145389	SLC38A6	solute carrier family 38 member 6 [Source:HGNC Symbol;Acc:HGNC:19863]
145748	LYSMD4	LysM domain containing 4 [Source:HGNC Symbol;Acc:HGNC:26571]
146198	ZFP90	ZFP90 zinc finger protein [Source:HGNC Symbol;Acc:HGNC:23329]
146923	RUNDC1	RUN domain containing 1 [Source:HGNC Symbol;Acc:HGNC:25418]
147007	TMEM199	transmembrane protein 199 [Source:HGNC Symbol;Acc:HGNC:18085]
1477	CSTF1	cleavage stimulation factor subunit 1 [Source:HGNC Symbol;Acc:HGNC:2483]
147700	KLC3	kinesin light chain 3 [Source:HGNC Symbol;Acc:HGNC:20717]
148223	C19orf25	chromosome 19 open reading frame 25 [Source:HGNC Symbol;Acc:HGNC:26711]
148304	C1orf74	chromosome 1 open reading frame 74 [Source:HGNC Symbol;Acc:HGNC:26319]
148867	SLC30A7	solute carrier family 30 member 7 [Source:HGNC Symbol;Acc:HGNC:19306]
149371	EXOC8	exocyst complex component 8 [Source:HGNC Symbol;Acc:HGNC:24659]
150383	CDPF1	cysteine rich DPF motif domain containing 1 [Source:HGNC Symbol;Acc:HGNC:33710]
150465	TTL	tubulin tyrosine ligase [Source:HGNC Symbol;Acc:HGNC:21586]
152579	SCFD2	sec1 family domain containing 2 [Source:HGNC Symbol;Acc:HGNC:30676]
154807	VKORC1L1	vitamin K epoxide reductase complex subunit 1 like 1 [Source:HGNC Symbol;Acc:HGNC:21492]
155435	RBM33	RNA binding motif protein 33 [Source:HGNC Symbol;Acc:HGNC:27223]
157922	CAMSAP1	calmodulin regulated spectrin associated protein 1 [Source:HGNC Symbol;Acc:HGNC:19946]
158056	MAMDC4	MAM domain containing 4 [Source:HGNC Symbol;Acc:HGNC:24083]
1600	DAB1	DAB adaptor protein 1 [Source:HGNC Symbol;Acc:HGNC:2661]
163732	CITED4	Cbp/p300 interacting transactivator with Glu/Asp rich carboxy-terminal domain 4 [Source:HGNC Symbol;Acc:HGNC:18696]
166378	SPATA5	spermatogenesis associated 5 [Source:HGNC Symbol;Acc:HGNC:18119]
1678	TIMM8A	translocase of inner mitochondrial membrane 8A [Source:HGNC Symbol;Acc:HGNC:11817]
170622	COMMD6	COMM domain containing 6 [Source:HGNC Symbol;Acc:HGNC:24015]
171023	ASXL1	ASXL transcriptional regulator 1 [Source:HGNC Symbol;Acc:HGNC:18318]
1741	DLG3	discs large MAGUK scaffold protein 3 [Source:HGNC Symbol;Acc:HGNC:2902]
1877	E4F1	E4F transcription factor 1 [Source:HGNC Symbol;Acc:HGNC:3121]
1967	EIF2B1	eukaryotic translation initiation factor 2B subunit alpha [Source:HGNC Symbol;Acc:HGNC:3257]
197370	NSMCE1	NSE1 homolog, SMC5-SMC6 complex component [Source:HGNC Symbol;Acc:HGNC:29897]
200014	CC2D1B	coiled-coil and C2 domain containing 1B [Source:HGNC Symbol;Acc:HGNC:29386]
200205	IBA57	iron-sulfur cluster assembly factor IBA57 [Source:HGNC Symbol;Acc:HGNC:27302]
201299	RDM1	RAD52 motif containing 1 [Source:HGNC Symbol;Acc:HGNC:19950]
203260	CCDC107	coiled-coil domain containing 107 [Source:HGNC Symbol;Acc:HGNC:28465]
2098	ESD	esterase D [Source:HGNC Symbol;Acc:HGNC:3465]
2137	EXTL3	exostosin like glycosyltransferase 3 [Source:HGNC Symbol;Acc:HGNC:3518]
219402	MTIF3	mitochondrial translational initiation factor 3 [Source:HGNC Symbol;Acc:HGNC:29788]
219927	MRPL21	mitochondrial ribosomal protein L21 [Source:HGNC Symbol;Acc:HGNC:14479]
221120	ALKBH3	alkB homolog 3, alpha-ketoglutaratedependent dioxygenase [Source:HGNC Symbol;Acc:HGNC:30141]
221443	OARD1	O-acyl-ADP-ribose deacylase 1 [Source:HGNC Symbol;Acc:HGNC:21257]
2245	FGD1	FYVE, RhoGEF and PH domain containing 1 [Source:HGNC Symbol;Acc:HGNC:3663]
2257	FGF12	fibroblast growth factor 12 [Source:HGNC Symbol;Acc:HGNC:3668]
22818	COPZ1	coatomer protein complex subunit zeta 1 [Source:HGNC Symbol;Acc:HGNC:2243]
22873	DZIP1	DAZ interacting zinc finger protein 1 [Source:HGNC Symbol;Acc:HGNC:20908]
22880	MORC2	MORC family CW-type zinc finger 2 [Source:HGNC Symbol;Acc:HGNC:23573]
22883	CLSTN1	calsyntenin 1 [Source:HGNC Symbol;Acc:HGNC:17447]
22902	RUFY3	RUN and FYVE domain containing 3 [Source:HGNC Symbol;Acc:HGNC:30285]
22954	TRIM32	tripartite motif containing 32 [Source:HGNC Symbol;Acc:HGNC:16380]
22978	NT5C2	5'-nucleotidase, cytosolic II [Source:HGNC Symbol;Acc:HGNC:8022]
22980	TCF25	transcription factor 25 [Source:HGNC Symbol;Acc:HGNC:29181]
23020	SNRNP200	small nuclear ribonucleoprotein U5 subunit 200 [Source:HGNC Symbol;Acc:HGNC:30859]
2305	FOXM1	forkhead box M1 [Source:HGNC Symbol;Acc:HGNC:3818]
23059	CLUAP1	clusterin associated protein 1 [Source:HGNC Symbol;Acc:HGNC:19009]
23066	CAND2	cullin associated and neddylation dissociated 2 (putative) [Source:HGNC Symbol;Acc:HGNC:30689]
231	AKR1B1	aldo-keto reductase family 1 member B [Source:HGNC Symbol;Acc:HGNC:381]
23130	ATG2A	autophagy related 2A [Source:HGNC Symbol;Acc:HGNC:29028]
23138	N4BP3	NEDD4 binding protein 3 [Source:HGNC Symbol;Acc:HGNC:29852]
23149	FCHO1	FCH domain only 1 [Source:HGNC Symbol;Acc:HGNC:29002]
23162	MAPK8IP3	mitogen-activated protein kinase 8 interacting protein 3 [Source:HGNC Symbol;Acc:HGNC:6884]
23167	EFR3A	EFR3 homolog A [Source:HGNC Symbol;Acc:HGNC:28970]
23190	UBXN4	UBX domain protein 4 [Source:HGNC Symbol;Acc:HGNC:14860]
23198	PSME4	proteasome activator subunit 4 [Source:HGNC Symbol;Acc:HGNC:20635]
23214	XPO6	exportin 6 [Source:HGNC Symbol;Acc:HGNC:19733]
23234	DNAJC9	DnaJ heat shock protein family (Hsp40) member C9 [Source:HGNC Symbol;Acc:HGNC:19123]
23240	TMEM131L	transmembrane 131 like [Source:HGNC Symbol;Acc:HGNC:29146]
23246	BOP1	BOP1 ribosomal biogenesis factor [Source:HGNC Symbol;Acc:HGNC:15519]
23259	DDHD2	DDHD domain containing 2 [Source:HGNC Symbol;Acc:HGNC:29106]
23264	ZC3H7B	zinc finger CCCH-type containing 7B [Source:HGNC Symbol;Acc:HGNC:30869]
23281	MTUS2	microtubule associated scaffold protein 2 [Source:HGNC Symbol;Acc:HGNC:20595]
23294	ANKS1A	ankyrin repeat and sterile alpha motif domain containing 1A [Source:HGNC Symbol;Acc:HGNC:20961]
23301	EHBP1	EH domain binding protein 1 [Source:HGNC Symbol;Acc:HGNC:29144]
23309	SIN3B	SIN3 transcription regulator family member B [Source:HGNC Symbol;Acc:HGNC:19354]
23334	SZT2	SZT2 subunit of KICSTOR complex [Source:HGNC Symbol;Acc:HGNC:29040]
23335	WDR7	WD repeat domain 7 [Source:HGNC Symbol;Acc:HGNC:13490]
23354	HAUS5	HAUS augmin like complex subunit 5 [Source:HGNC Symbol;Acc:HGNC:29130]
23360	FNBP4	formin binding protein 4 [Source:HGNC Symbol;Acc:HGNC:19752]
23370	ARHGEF18	Rho/Rac guanine nucleotide exchange factor 18 [Source:HGNC Symbol;Acc:HGNC:17090]
23384	SPECC1L	sperm antigen with calponin homology and coiled-coil domains 1 like [Source:HGNC Symbol;Acc:HGNC:29022]
23408	SIRT5	sirtuin 5 [Source:HGNC Symbol;Acc:HGNC:14933]
23410	SIRT3	sirtuin 3 [Source:HGNC Symbol;Acc:HGNC:14931]
23438	HARS2	histidyl-tRNA synthetase 2, mitochondrial [Source:HGNC Symbol;Acc:HGNC:4817]
23549	DNPEP	aspartyl aminopeptidase [Source:HGNC Symbol;Acc:HGNC:2981]
23554	TSPAN12	tetraspanin 12 [Source:HGNC Symbol;Acc:HGNC:21641]
2356	FPGS	folylpolyglutamate synthase [Source:HGNC Symbol;Acc:HGNC:3824]
23598	PATZ1	POZ/BTB and AT hook containing zinc finger 1 [Source:HGNC Symbol;Acc:HGNC:13071]
23603	CORO1C	coronin 1C [Source:HGNC Symbol;Acc:HGNC:2254]
23660	ZKSCAN5	zinc finger with KRAB and SCAN domains 5 [Source:HGNC Symbol;Acc:HGNC:12867]
23677	SH3BP4	SH3 domain binding protein 4 [Source:HGNC Symbol;Acc:HGNC:10826]
245711	SPDYA	speedy/RINGO cell cycle regulator family member A [Source:HGNC Symbol;Acc:HGNC:30613]
246181	AKR7L	aldo-keto reductase family 7 like (gene/pseudogene) [Source:HGNC Symbol;Acc:HGNC:24056]
254042	METAP1D	methionyl aminopeptidase type 1D, mitochondrial [Source:HGNC Symbol;Acc:HGNC:32583]
254122	SNX32	sorting nexin 32 [Source:HGNC Symbol;Acc:HGNC:26423]
254428	SLC41A1	solute carrier family 41 member 1 [Source:HGNC Symbol;Acc:HGNC:19429]
2563	GABRD	gamma-aminobutyric acid type A receptor delta subunit [Source:HGNC Symbol;Acc:HGNC:4084]
256364	EML3	EMAP like 3 [Source:HGNC Symbol;Acc:HGNC:26666]
257160	RNF214	ring finger protein 214 [Source:HGNC Symbol;Acc:HGNC:25335]
25771	TBC1D22A	TBC1 domain family member 22A [Source:HGNC Symbol;Acc:HGNC:1309]
25807	RHBDD3	rhomboid domain containing 3 [Source:HGNC Symbol;Acc:HGNC:1308]
25814	ATXN10	ataxin 10 [Source:HGNC Symbol;Acc:HGNC:10549]
25851	TECPR1	tectonin beta-propeller repeat containing 1 [Source:HGNC Symbol;Acc:HGNC:22214]
25885	POLR1A	RNA polymerase I subunit A [Source:HGNC Symbol;Acc:HGNC:17264]
25900	IFFO1	intermediate filament family orphan 1 [Source:HGNC Symbol;Acc:HGNC:24970]
25906	ANAPC15	anaphase promoting complex subunit 15 [Source:HGNC Symbol;Acc:HGNC:24531]
25929	GEMIN5	gem nuclear organelle associated protein 5 [Source:HGNC Symbol;Acc:HGNC:20043]
25930	PTPN23	protein tyrosine phosphatase non-receptor type 23 [Source:HGNC Symbol;Acc:HGNC:14406]
25940	FAM98A	family with sequence similarity 98 member A [Source:HGNC Symbol;Acc:HGNC:24520]
25980	AAR2	AAR2 splicing factor [Source:HGNC Symbol;Acc:HGNC:15886]
26009	AC118549.1	zinc finger ZZ-type containing 3 [Source:NCBI gene;Acc:26009]
26012	NSMF	NMDA receptor synaptonuclear signaling and neuronal migration factor [Source:HGNC Symbol;Acc:HGNC:29843]
26015	RPAP1	RNA polymerase II associated protein 1 [Source:HGNC Symbol;Acc:HGNC:24567]
26058	GIGYF2	GRB10 interacting GYF protein 2 [Source:HGNC Symbol;Acc:HGNC:11960]
26086	GPSM1	G protein signaling modulator 1 [Source:HGNC Symbol;Acc:HGNC:17858]
26090	ABHD12	abhydrolase domain containing 12 [Source:HGNC Symbol;Acc:HGNC:15868]
26151	NAT9	N-acetyltransferase 9 (putative) [Source:HGNC Symbol;Acc:HGNC:23133]
26155	NOC2L	NOC2 like nucleolar associated transcriptional repressor [Source:HGNC Symbol;Acc:HGNC:24517]
26262	TSPAN17	tetraspanin 17 [Source:HGNC Symbol;Acc:HGNC:13594]
2644	GCHFR	GTP cyclohydrolase I feedback regulator [Source:HGNC Symbol;Acc:HGNC:4194]
2647	BLOC1S1	biogenesis of lysosomal organelles complex 1 subunit 1 [Source:HGNC Symbol;Acc:HGNC:4200]
26750	RPS6KC1	ribosomal protein S6 kinase C1 [Source:HGNC Symbol;Acc:HGNC:10439]
27235	COQ2	coenzyme Q2, polyprenyltransferase [Source:HGNC Symbol;Acc:HGNC:25223]
27254	CSDC2	cold shock domain containing C2 [Source:HGNC Symbol;Acc:HGNC:30359]
27258	LSM3	LSM3 homolog, U6 small nuclear RNA and mRNA degradation associated [Source:HGNC Symbol;Acc:HGNC:17874]
27433	TOR2A	torsin family 2 member A [Source:HGNC Symbol;Acc:HGNC:11996]
2762	GMDS	GDP-mannose 4,6-dehydratase [Source:HGNC Symbol;Acc:HGNC:4369]
2782	GNB1	G protein subunit beta 1 [Source:HGNC Symbol;Acc:HGNC:4396]
283489	CHAMP1	chromosome alignment maintaining phosphoprotein 1 [Source:HGNC Symbol;Acc:HGNC:20311]
283677	REC114	REC114 meiotic recombination protein [Source:HGNC Symbol;Acc:HGNC:25065]
283899	INO80E	INO80 complex subunit E [Source:HGNC Symbol;Acc:HGNC:26905]
283987	HID1	HID1 domain containing [Source:HGNC Symbol;Acc:HGNC:15736]
284346	ZNF575	zinc finger protein 575 [Source:HGNC Symbol;Acc:HGNC:27606]
285148	IAH1	isoamyl acetate hydrolyzing esterase 1 (putative) [Source:HGNC Symbol;Acc:HGNC:27696]
285193	DUSP28	dual specificity phosphatase 28 [Source:HGNC Symbol;Acc:HGNC:33237]
285367	RPUSD3	RNA pseudouridine synthase D3 [Source:HGNC Symbol;Acc:HGNC:28437]
285381	DPH3	diphthamide biosynthesis 3 [Source:HGNC Symbol;Acc:HGNC:27717]
285971	ZNF775	zinc finger protein 775 [Source:HGNC Symbol;Acc:HGNC:28501]
2889	RAPGEF1	Rap guanine nucleotide exchange factor 1 [Source:HGNC Symbol;Acc:HGNC:4568]
28971	AAMDC	adipogenesis associated Mth938 domain containing [Source:HGNC Symbol;Acc:HGNC:30205]
28988	DBNL	drebrin like [Source:HGNC Symbol;Acc:HGNC:2696]
29057	FAM156A	family with sequence similarity 156 member A [Source:HGNC Symbol;Acc:HGNC:30114]
29079	MED4	mediator complex subunit 4 [Source:HGNC Symbol;Acc:HGNC:17903]
29085	PHPT1	phosphohistidine phosphatase 1 [Source:HGNC Symbol;Acc:HGNC:30033]
29086	BABAM1	BRISC and BRCA1 A complex member 1 [Source:HGNC Symbol;Acc:HGNC:25008]
29123	ANKRD11	ankyrin repeat domain 11 [Source:HGNC Symbol;Acc:HGNC:21316]
2950	GSTP1	glutathione S-transferase pi 1 [Source:HGNC Symbol;Acc:HGNC:4638]
29985	SLC39A3	solute carrier family 39 member 3 [Source:HGNC Symbol;Acc:HGNC:17128]
29997	NOP53	NOP53 ribosome biogenesis factor [Source:HGNC Symbol;Acc:HGNC:4333]
3035	HARS	histidyl-tRNA synthetase [Source:HGNC Symbol;Acc:HGNC:4816]
3054	HCFC1	host cell factor C1 [Source:HGNC Symbol;Acc:HGNC:4839]
30850	CDR2L	cerebellar degeneration related protein 2 like [Source:HGNC Symbol;Acc:HGNC:29999]
309	ANXA6	annexin A6 [Source:HGNC Symbol;Acc:HGNC:544]
30968	STOML2	stomatin like 2 [Source:HGNC Symbol;Acc:HGNC:14559]
3119	HLA-DQB1	major histocompatibility complex, class II, DQ beta 1 [Source:HGNC Symbol;Acc:HGNC:4944]
3169	FOXA1	forkhead box A1 [Source:HGNC Symbol;Acc:HGNC:5021]
318	NUDT2	nudix hydrolase 2 [Source:HGNC Symbol;Acc:HGNC:8049]
3239	HOXD13	homeobox D13 [Source:HGNC Symbol;Acc:HGNC:5136]
3241	HPCAL1	hippocalcin like 1 [Source:HGNC Symbol;Acc:HGNC:5145]
327	APEH	acylaminoacyl-peptide hydrolase [Source:HGNC Symbol;Acc:HGNC:586]
338328	GPIHBP1	glycosylphosphatidylinositol anchored high density lipoprotein binding protein 1 [Source:HGNC Symbol;Acc:HGNC:24945]
339123	JMJD8	jumonji domain containing 8 [Source:HGNC Symbol;Acc:HGNC:14148]
339451	KLHL17	kelch like family member 17 [Source:HGNC Symbol;Acc:HGNC:24023]
3396	MRPL58	mitochondrial ribosomal protein L58 [Source:HGNC Symbol;Acc:HGNC:5359]
347240	KIF24	kinesin family member 24 [Source:HGNC Symbol;Acc:HGNC:19916]
3476	IGBP1	immunoglobulin binding protein 1 [Source:HGNC Symbol;Acc:HGNC:5461]
348180	CTU2	cytosolic thiouridylase subunit 2 [Source:HGNC Symbol;Acc:HGNC:28005]
348235	SKA2	spindle and kinetochore associated complex subunit 2 [Source:HGNC Symbol;Acc:HGNC:28006]
348995	NUP43	nucleoporin 43 [Source:HGNC Symbol;Acc:HGNC:21182]
3508	IGHMBP2	immunoglobulin mu DNA binding protein 2 [Source:HGNC Symbol;Acc:HGNC:5542]
3622	ING2	inhibitor of growth family member 2 [Source:HGNC Symbol;Acc:HGNC:6063]
3661	IRF3	interferon regulatory factor 3 [Source:HGNC Symbol;Acc:HGNC:6118]
375287	RBM43	RNA binding motif protein 43 [Source:HGNC Symbol;Acc:HGNC:24790]
375757	SWI5	SWI5 homologous recombination repair protein [Source:HGNC Symbol;Acc:HGNC:31412]
375759	C9orf50	chromosome 9 open reading frame 50 [Source:HGNC Symbol;Acc:HGNC:23677]
3855	KRT7	keratin 7 [Source:HGNC Symbol;Acc:HGNC:6445]
388021	TMEM179	transmembrane protein 179 [Source:HGNC Symbol;Acc:HGNC:20137]
388228	SBK1	SH3 domain binding kinase 1 [Source:HGNC Symbol;Acc:HGNC:17699]
388588	SMIM1	small integral membrane protein 1 (Vel blood group) [Source:HGNC Symbol;Acc:HGNC:44204]
391356	PTRHD1	peptidyl-tRNA hydrolase domain containing 1 [Source:HGNC Symbol;Acc:HGNC:33782]
3916	LAMP1	lysosomal associated membrane protein 1 [Source:HGNC Symbol;Acc:HGNC:6499]
400	ARL1	ADP ribosylation factor like GTPase 1 [Source:HGNC Symbol;Acc:HGNC:692]
402	ARL2	ADP ribosylation factor like GTPase 2 [Source:HGNC Symbol;Acc:HGNC:693]
402055	SRRD	SRR1 domain containing [Source:HGNC Symbol;Acc:HGNC:33910]
404550	C16orf74	chromosome 16 open reading frame 74 [Source:HGNC Symbol;Acc:HGNC:23362]
4054	LTBP3	latent transforming growth factor beta binding protein 3 [Source:HGNC Symbol;Acc:HGNC:6716]
4069	LYZ	lysozyme [Source:HGNC Symbol;Acc:HGNC:6740]
4116	MAGOH	mago homolog, exon junction complex subunit [Source:HGNC Symbol;Acc:HGNC:6815]
4125	MAN2B1	mannosidase alpha class 2B member 1 [Source:HGNC Symbol;Acc:HGNC:6826]
414328	IDNK	IDNK gluconokinase [Source:HGNC Symbol;Acc:HGNC:31367]
4152	MBD1	methyl-CpG binding domain protein 1 [Source:HGNC Symbol;Acc:HGNC:6916]
4194	MDM4	MDM4 regulator of p53 [Source:HGNC Symbol;Acc:HGNC:6974]
4207	BORCS8-MEF2B	BORCS8-MEF2B readthrough [Source:HGNC Symbol;Acc:HGNC:39979]
4357	MPST	mercaptopyruvate sulfurtransferase [Source:HGNC Symbol;Acc:HGNC:7223]
4435	CITED1	Cbp/p300 interacting transactivator with Glu/Asp rich carboxy-terminal domain 1 [Source:HGNC Symbol;Acc:HGNC:1986]
4666	NACA	nascent polypeptide associated complex subunit alpha [Source:HGNC Symbol;Acc:HGNC:7629]
4725	NDUFS5	NADH:ubiquinone oxidoreductase subunit S5 [Source:HGNC Symbol;Acc:HGNC:7712]
4747	NEFL	neurofilament light [Source:HGNC Symbol;Acc:HGNC:7739]
4773	NFATC2	nuclear factor of activated T cells 2 [Source:HGNC Symbol;Acc:HGNC:7776]
4775	NFATC3	nuclear factor of activated T cells 3 [Source:HGNC Symbol;Acc:HGNC:7777]
4798	NFRKB	nuclear factor related to kappaB binding protein [Source:HGNC Symbol;Acc:HGNC:7802]
4809	SNU13	small nuclear ribonucleoprotein 13 [Source:HGNC Symbol;Acc:HGNC:7819]
4820	NKTR	natural killer cell triggering receptor [Source:HGNC Symbol;Acc:HGNC:7833]
4924	NUCB1	nucleobindin 1 [Source:HGNC Symbol;Acc:HGNC:8043]
493856	CISD2	CDGSH iron sulfur domain 2 [Source:HGNC Symbol;Acc:HGNC:24212]
5034	P4HB	prolyl 4-hydroxylase subunit beta [Source:HGNC Symbol;Acc:HGNC:8548]
5050	PAFAH1B3	platelet activating factor acetylhydrolase 1b catalytic subunit 3 [Source:HGNC Symbol;Acc:HGNC:8576]
50511	SYCP3	synaptonemal complex protein 3 [Source:HGNC Symbol;Acc:HGNC:18130]
50626	CYHR1	cysteine and histidine rich 1 [Source:HGNC Symbol;Acc:HGNC:17806]
50807	ASAP1	ArfGAP with SH3 domain, ankyrin repeat and PH domain 1 [Source:HGNC Symbol;Acc:HGNC:2720]
50861	STMN3	stathmin 3 [Source:HGNC Symbol;Acc:HGNC:15926]
51004	COQ6	coenzyme Q6, monooxygenase [Source:HGNC Symbol;Acc:HGNC:20233]
51005	AMDHD2	amidohydrolase domain containing 2 [Source:HGNC Symbol;Acc:HGNC:24262]
51006	SLC35C2	solute carrier family 35 member C2 [Source:HGNC Symbol;Acc:HGNC:17117]
51025	PAM16	presequence translocase associated motor 16 [Source:HGNC Symbol;Acc:HGNC:29679]
51069	MRPL2	mitochondrial ribosomal protein L2 [Source:HGNC Symbol;Acc:HGNC:14056]
51072	MEMO1	mediator of cell motility 1 [Source:HGNC Symbol;Acc:HGNC:14014]
51098	IFT52	intraflagellar transport 52 [Source:HGNC Symbol;Acc:HGNC:15901]
51114	ZDHHC9	zinc finger DHHC-type containing 9 [Source:HGNC Symbol;Acc:HGNC:18475]
51134	CEP83	centrosomal protein 83 [Source:HGNC Symbol;Acc:HGNC:17966]
51138	COPS4	COP9 signalosome subunit 4 [Source:HGNC Symbol;Acc:HGNC:16702]
51144	HSD17B12	hydroxysteroid 17-beta dehydrogenase 12 [Source:HGNC Symbol;Acc:HGNC:18646]
51149	MRNIP	MRN complex interacting protein [Source:HGNC Symbol;Acc:HGNC:30817]
51150	SDF4	stromal cell derived factor 4 [Source:HGNC Symbol;Acc:HGNC:24188]
51222	ZNF219	zinc finger protein 219 [Source:HGNC Symbol;Acc:HGNC:13011]
51227	PIGP	phosphatidylinositol glycan anchor biosynthesis class P [Source:HGNC Symbol;Acc:HGNC:3046]
51230	PHF20	PHD finger protein 20 [Source:HGNC Symbol;Acc:HGNC:16098]
51231	VRK3	VRK serine/threonine kinase 3 [Source:HGNC Symbol;Acc:HGNC:18996]
51234	EMC4	ER membrane protein complex subunit 4 [Source:HGNC Symbol;Acc:HGNC:28032]
51247	PAIP2	poly(A) binding protein interacting protein 2 [Source:HGNC Symbol;Acc:HGNC:17970]
51253	MRPL37	mitochondrial ribosomal protein L37 [Source:HGNC Symbol;Acc:HGNC:14034]
51259	TMEM216	transmembrane protein 216 [Source:HGNC Symbol;Acc:HGNC:25018]
51280	GOLM1	golgi membrane protein 1 [Source:HGNC Symbol;Acc:HGNC:15451]
5129	CDK18	cyclin dependent kinase 18 [Source:HGNC Symbol;Acc:HGNC:8751]
51293	CD320	CD320 molecule [Source:HGNC Symbol;Acc:HGNC:16692]
51304	ZDHHC3	zinc finger DHHC-type containing 3 [Source:HGNC Symbol;Acc:HGNC:18470]
51329	ARL6IP4	ADP ribosylation factor like GTPase 6 interacting protein 4 [Source:HGNC Symbol;Acc:HGNC:18076]
51374	ATRAID	all-trans retinoic acid induced differentiation factor [Source:HGNC Symbol;Acc:HGNC:24090]
51389	RWDD1	RWD domain containing 1 [Source:HGNC Symbol;Acc:HGNC:20993]
51439	FAM8A1	family with sequence similarity 8 member A1 [Source:HGNC Symbol;Acc:HGNC:16372]
51451	LCMT1	leucine carboxyl methyltransferase 1 [Source:HGNC Symbol;Acc:HGNC:17557]
51503	CWC15	CWC15 spliceosome associated protein homolog [Source:HGNC Symbol;Acc:HGNC:26939]
51530	ZC3HC1	zinc finger C3HC-type containing 1 [Source:HGNC Symbol;Acc:HGNC:29913]
51534	VTA1	vesicle trafficking 1 [Source:HGNC Symbol;Acc:HGNC:20954]
51537	MTFP1	mitochondrial fission process 1 [Source:HGNC Symbol;Acc:HGNC:26945]
51560	RAB6B	RAB6B, member RAS oncogene family [Source:HGNC Symbol;Acc:HGNC:14902]
51564	HDAC7	histone deacetylase 7 [Source:HGNC Symbol;Acc:HGNC:14067]
51602	NOP58	NOP58 ribonucleoprotein [Source:HGNC Symbol;Acc:HGNC:29926]
51603	EEF1AKNMT	eEF1A lysine and N-terminal methyltransferase [Source:HGNC Symbol;Acc:HGNC:24248]
51604	PIGT	phosphatidylinositol glycan anchor biosynthesis class T [Source:HGNC Symbol;Acc:HGNC:14938]
51626	DYNC2LI1	dynein cytoplasmic 2 light intermediate chain 1 [Source:HGNC Symbol;Acc:HGNC:24595]
51629	SLC25A39	solute carrier family 25 member 39 [Source:HGNC Symbol;Acc:HGNC:24279]
51639	SF3B6	splicing factor 3b subunit 6 [Source:HGNC Symbol;Acc:HGNC:30096]
51649	MRPS23	mitochondrial ribosomal protein S23 [Source:HGNC Symbol;Acc:HGNC:14509]
51652	CHMP3	charged multivesicular body protein 3 [Source:HGNC Symbol;Acc:HGNC:29865]
51669	SARAF	store-operated calcium entry associated regulatory factor [Source:HGNC Symbol;Acc:HGNC:28789]
51741	WWOX	WW domain containing oxidoreductase [Source:HGNC Symbol;Acc:HGNC:12799]
51808	PHAX	phosphorylated adaptor for RNA export [Source:HGNC Symbol;Acc:HGNC:10241]
5184	PEPD	peptidase D [Source:HGNC Symbol;Acc:HGNC:8840]
5326	PLAGL2	PLAG1 like zinc finger 2 [Source:HGNC Symbol;Acc:HGNC:9047]
5356	PLRG1	pleiotropic regulator 1 [Source:HGNC Symbol;Acc:HGNC:9089]
53917	RAB24	RAB24, member RAS oncogene family [Source:HGNC Symbol;Acc:HGNC:9765]
54103	GSAP	gamma-secretase activating protein [Source:HGNC Symbol;Acc:HGNC:28042]
54187	NANS	N-acetylneuraminate synthase [Source:HGNC Symbol;Acc:HGNC:19237]
5442	POLRMT	RNA polymerase mitochondrial [Source:HGNC Symbol;Acc:HGNC:9200]
54461	FBXW5	F-box and WD repeat domain containing 5 [Source:HGNC Symbol;Acc:HGNC:13613]
54471	MIEF1	mitochondrial elongation factor 1 [Source:HGNC Symbol;Acc:HGNC:25979]
54497	HEATR5B	HEAT repeat containing 5B [Source:HGNC Symbol;Acc:HGNC:29273]
54499	TMCO1	transmembrane and coiled-coil domains 1 [Source:HGNC Symbol;Acc:HGNC:18188]
54529	ASNSD1	asparagine synthetase domain containing 1 [Source:HGNC Symbol;Acc:HGNC:24910]
5459	POU4F3	POU class 4 homeobox 3 [Source:HGNC Symbol;Acc:HGNC:9220]
5476	CTSA	cathepsin A [Source:HGNC Symbol;Acc:HGNC:9251]
54776	PPP1R12C	protein phosphatase 1 regulatory subunit 12C [Source:HGNC Symbol;Acc:HGNC:14947]
54808	DYM	dymeclin [Source:HGNC Symbol;Acc:HGNC:21317]
54838	WBP1L	WW domain binding protein 1 like [Source:HGNC Symbol;Acc:HGNC:23510]
54853	WDR55	WD repeat domain 55 [Source:HGNC Symbol;Acc:HGNC:25971]
54858	PGPEP1	pyroglutamyl-peptidase I [Source:HGNC Symbol;Acc:HGNC:13568]
54862	CC2D1A	coiled-coil and C2 domain containing 1A [Source:HGNC Symbol;Acc:HGNC:30237]
54896	PQLC2	PQ loop repeat containing 2 [Source:HGNC Symbol;Acc:HGNC:26001]
54899	PXK	PX domain containing serine/threonine kinase like [Source:HGNC Symbol;Acc:HGNC:23326]
54927	CHCHD3	coiled-coil-helix-coiled-coil-helix domain containing 3 [Source:HGNC Symbol;Acc:HGNC:21906]
54929	TMEM161A	transmembrane protein 161A [Source:HGNC Symbol;Acc:HGNC:26020]
54949	SDHAF2	succinate dehydrogenase complex assembly factor 2 [Source:HGNC Symbol;Acc:HGNC:26034]
54952	TRNAU1AP	tRNA selenocysteine 1 associated protein 1 [Source:HGNC Symbol;Acc:HGNC:30813]
54960	GEMIN8	gem nuclear organelle associated protein 8 [Source:HGNC Symbol;Acc:HGNC:26044]
54965	PIGX	phosphatidylinositol glycan anchor biosynthesis class X [Source:HGNC Symbol;Acc:HGNC:26046]
54971	BANP	BTG3 associated nuclear protein [Source:HGNC Symbol;Acc:HGNC:13450]
54986	ULK4	unc-51 like kinase 4 [Source:HGNC Symbol;Acc:HGNC:15784]
54997	TESC	tescalcin [Source:HGNC Symbol;Acc:HGNC:26065]
55009	C19orf24	chromosome 19 open reading frame 24 [Source:HGNC Symbol;Acc:HGNC:26073]
55031	USP47	ubiquitin specific peptidase 47 [Source:HGNC Symbol;Acc:HGNC:20076]
55052	MRPL20	mitochondrial ribosomal protein L20 [Source:HGNC Symbol;Acc:HGNC:14478]
55129	ANO10	anoctamin 10 [Source:HGNC Symbol;Acc:HGNC:25519]
55132	LARP1B	La ribonucleoprotein domain family member 1B [Source:HGNC Symbol;Acc:HGNC:24704]
5515	PPP2CA	protein phosphatase 2 catalytic subunit alpha [Source:HGNC Symbol;Acc:HGNC:9299]
55178	MRM3	mitochondrial rRNA methyltransferase 3 [Source:HGNC Symbol;Acc:HGNC:18485]
55205	ZNF532	zinc finger protein 532 [Source:HGNC Symbol;Acc:HGNC:30940]
55210	ATAD3A	ATPase family AAA domain containing 3A [Source:HGNC Symbol;Acc:HGNC:25567]
55225	RAVER2	ribonucleoprotein, PTB binding 2 [Source:HGNC Symbol;Acc:HGNC:25577]
55230	USP40	ubiquitin specific peptidase 40 [Source:HGNC Symbol;Acc:HGNC:20069]
55238	SLC38A7	solute carrier family 38 member 7 [Source:HGNC Symbol;Acc:HGNC:25582]
55248	TMEM206	transmembrane protein 206 [Source:HGNC Symbol;Acc:HGNC:25593]
55250	ELP2	elongator acetyltransferase complex subunit 2 [Source:HGNC Symbol;Acc:HGNC:18248]
55274	PHF10	PHD finger protein 10 [Source:HGNC Symbol;Acc:HGNC:18250]
5528	PPP2R5D	protein phosphatase 2 regulatory subunit B'delta [Source:HGNC Symbol;Acc:HGNC:9312]
55296	TBC1D19	TBC1 domain family member 19 [Source:HGNC Symbol;Acc:HGNC:25624]
55298	RNF121	ring finger protein 121 [Source:HGNC Symbol;Acc:HGNC:21070]
55329	MNS1	meiosis specific nuclear structural 1 [Source:HGNC Symbol;Acc:HGNC:29636]
5537	PPP6C	protein phosphatase 6 catalytic subunit [Source:HGNC Symbol;Acc:HGNC:9323]
55486	PARL	presenilin associated rhomboid like [Source:HGNC Symbol;Acc:HGNC:18253]
55565	ZNF821	zinc finger protein 821 [Source:HGNC Symbol;Acc:HGNC:28043]
55573	CDV3	CDV3 homolog [Source:HGNC Symbol;Acc:HGNC:26928]
55621	TRMT1	tRNA methyltransferase 1 [Source:HGNC Symbol;Acc:HGNC:25980]
55633	TBC1D22B	TBC1 domain family member 22B [Source:HGNC Symbol;Acc:HGNC:21602]
5565	PRKAB2	protein kinase AMP-activated non-catalytic subunit beta 2 [Source:HGNC Symbol;Acc:HGNC:9379]
55652	SLC48A1	solute carrier family 48 member 1 [Source:HGNC Symbol;Acc:HGNC:26035]
55660	PRPF40A	pre-mRNA processing factor 40 homolog A [Source:HGNC Symbol;Acc:HGNC:16463]
55665	URGCP	upregulator of cell proliferation [Source:HGNC Symbol;Acc:HGNC:30890]
55683	KANSL3	KAT8 regulatory NSL complex subunit 3 [Source:HGNC Symbol;Acc:HGNC:25473]
55703	POLR3B	RNA polymerase III subunit B [Source:HGNC Symbol;Acc:HGNC:30348]
55707	NECAP2	NECAP endocytosis associated 2 [Source:HGNC Symbol;Acc:HGNC:25528]
55711	FAR2	fatty acyl-CoA reductase 2 [Source:HGNC Symbol;Acc:HGNC:25531]
55720	TSR1	TSR1 ribosome maturation factor [Source:HGNC Symbol;Acc:HGNC:25542]
55739	NAXD	NAD(P)HX dehydratase [Source:HGNC Symbol;Acc:HGNC:25576]
55746	NUP133	nucleoporin 133 [Source:HGNC Symbol;Acc:HGNC:18016]
55759	WDR12	WD repeat domain 12 [Source:HGNC Symbol;Acc:HGNC:14098]
55763	EXOC1	exocyst complex component 1 [Source:HGNC Symbol;Acc:HGNC:30380]
55812	AL049834.1	spermatogenesis associated 7 [Source:NCBI gene;Acc:55812]
55830	GLT8D1	glycosyltransferase 8 domain containing 1 [Source:HGNC Symbol;Acc:HGNC:24870]
55832	CAND1	cullin associated and neddylation dissociated 1 [Source:HGNC Symbol;Acc:HGNC:30688]
55850	USE1	unconventional SNARE in the ER 1 [Source:HGNC Symbol;Acc:HGNC:30882]
55905	RNF114	ring finger protein 114 [Source:HGNC Symbol;Acc:HGNC:13094]
55909	BIN3	bridging integrator 3 [Source:HGNC Symbol;Acc:HGNC:1054]
55954	ZMAT5	zinc finger matrin-type 5 [Source:HGNC Symbol;Acc:HGNC:28046]
55974	SLC50A1	solute carrier family 50 member 1 [Source:HGNC Symbol;Acc:HGNC:30657]
56006	SMG9	SMG9 nonsense mediated mRNA decay factor [Source:HGNC Symbol;Acc:HGNC:25763]
5612	THAP12	THAP domain containing 12 [Source:HGNC Symbol;Acc:HGNC:9440]
56257	MEPCE	methylphosphate capping enzyme [Source:HGNC Symbol;Acc:HGNC:20247]
5630	PRPH	peripherin [Source:HGNC Symbol;Acc:HGNC:9461]
56474	CTPS2	CTP synthase 2 [Source:HGNC Symbol;Acc:HGNC:2520]
56478	EIF4ENIF1	eukaryotic translation initiation factor 4E nuclear import factor 1 [Source:HGNC Symbol;Acc:HGNC:16687]
56882	CDC42SE1	CDC42 small effector 1 [Source:HGNC Symbol;Acc:HGNC:17719]
56904	SH3GLB2	SH3 domain containing GRB2 like, endophilin B2 [Source:HGNC Symbol;Acc:HGNC:10834]
56941	HMCES	5-hydroxymethylcytosine binding, ES cell specific [Source:HGNC Symbol;Acc:HGNC:24446]
56942	CMC2	C-X9-C motif containing 2 [Source:HGNC Symbol;Acc:HGNC:24447]
56949	XAB2	XPA binding protein 2 [Source:HGNC Symbol;Acc:HGNC:14089]
56965	PARP6	poly(ADP-ribose) polymerase family member 6 [Source:HGNC Symbol;Acc:HGNC:26921]
56984	PSMG2	proteasome assembly chaperone 2 [Source:HGNC Symbol;Acc:HGNC:24929]
57019	CIAPIN1	cytokine induced apoptosis inhibitor 1 [Source:HGNC Symbol;Acc:HGNC:28050]
57038	RARS2	arginyl-tRNA synthetase 2, mitochondrial [Source:HGNC Symbol;Acc:HGNC:21406]
57048	PLSCR3	phospholipid scramblase 3 [Source:HGNC Symbol;Acc:HGNC:16495]
57060	PCBP4	poly(rC) binding protein 4 [Source:HGNC Symbol;Acc:HGNC:8652]
57107	PDSS2	decaprenyl diphosphate synthase subunit 2 [Source:HGNC Symbol;Acc:HGNC:23041]
57124	CD248	CD248 molecule [Source:HGNC Symbol;Acc:HGNC:18219]
57187	THOC2	THO complex 2 [Source:HGNC Symbol;Acc:HGNC:19073]
57192	MCOLN1	mucolipin 1 [Source:HGNC Symbol;Acc:HGNC:13356]
572	BAD	BCL2 associated agonist of cell death [Source:HGNC Symbol;Acc:HGNC:936]
57335	ZNF286A	zinc finger protein 286A [Source:HGNC Symbol;Acc:HGNC:13501]
57407	NMRAL1	NmrA like redox sensor 1 [Source:HGNC Symbol;Acc:HGNC:24987]
57446	NDRG3	NDRG family member 3 [Source:HGNC Symbol;Acc:HGNC:14462]
57461	ISY1	ISY1 splicing factor homolog [Source:HGNC Symbol;Acc:HGNC:29201]
57469	PNMA8B	PNMA family member 8B [Source:HGNC Symbol;Acc:HGNC:29206]
57505	AARS2	alanyl-tRNA synthetase 2, mitochondrial [Source:HGNC Symbol;Acc:HGNC:21022]
57510	XPO5	exportin 5 [Source:HGNC Symbol;Acc:HGNC:17675]
57655	GRAMD1A	GRAM domain containing 1A [Source:HGNC Symbol;Acc:HGNC:29305]
57703	CWC22	CWC22 spliceosome associated protein homolog [Source:HGNC Symbol;Acc:HGNC:29322]
57862	ZNF410	zinc finger protein 410 [Source:HGNC Symbol;Acc:HGNC:20144]
5822	PWP2	PWP2 small subunit processome component [Source:HGNC Symbol;Acc:HGNC:9711]
58508	KMT2C	lysine methyltransferase 2C [Source:HGNC Symbol;Acc:HGNC:13726]
59343	SENP2	SUMO specific peptidase 2 [Source:HGNC Symbol;Acc:HGNC:23116]
5987	TRIM27	tripartite motif containing 27 [Source:HGNC Symbol;Acc:HGNC:9975]
6001	RGS10	regulator of G protein signaling 10 [Source:HGNC Symbol;Acc:HGNC:9992]
60490	PPCDC	phosphopantothenoylcysteine decarboxylase [Source:HGNC Symbol;Acc:HGNC:28107]
60528	ELAC2	elaC ribonuclease Z 2 [Source:HGNC Symbol;Acc:HGNC:14198]
6144	RPL21	ribosomal protein L21 [Source:HGNC Symbol;Acc:HGNC:10313]
6158	RPL28	ribosomal protein L28 [Source:HGNC Symbol;Acc:HGNC:10330]
6168	RPL37A	ribosomal protein L37a [Source:HGNC Symbol;Acc:HGNC:10348]
6181	RPLP2	ribosomal protein lateral stalk subunit P2 [Source:HGNC Symbol;Acc:HGNC:10377]
6210	RPS15A	ribosomal protein S15a [Source:HGNC Symbol;Acc:HGNC:10389]
6227	RPS21	ribosomal protein S21 [Source:HGNC Symbol;Acc:HGNC:10409]
6229	RPS24	ribosomal protein S24 [Source:HGNC Symbol;Acc:HGNC:10411]
6253	RTN2	reticulon 2 [Source:HGNC Symbol;Acc:HGNC:10468]
63906	GPATCH3	G-patch domain containing 3 [Source:HGNC Symbol;Acc:HGNC:25720]
63915	BLOC1S5	biogenesis of lysosomal organelles complex 1 subunit 5 [Source:HGNC Symbol;Acc:HGNC:18561]
63925	ZNF335	zinc finger protein 335 [Source:HGNC Symbol;Acc:HGNC:15807]
64096	GFRA4	GDNF family receptor alpha 4 [Source:HGNC Symbol;Acc:HGNC:13821]
64146	PDF	peptide deformylase, mitochondrial [Source:HGNC Symbol;Acc:HGNC:30012]
64151	NCAPG	non-SMC condensin I complex subunit G [Source:HGNC Symbol;Acc:HGNC:24304]
64223	MLST8	MTOR associated protein, LST8 homolog [Source:HGNC Symbol;Acc:HGNC:24825]
64319	FBRS	fibrosin [Source:HGNC Symbol;Acc:HGNC:20442]
64409	GALNT17	polypeptide N-acetylgalactosaminyltransferase 17 [Source:HGNC Symbol;Acc:HGNC:16347]
644096	SDHAF1	succinate dehydrogenase complex assembly factor 1 [Source:HGNC Symbol;Acc:HGNC:33867]
64412	GZF1	GDNF inducible zinc finger protein 1 [Source:HGNC Symbol;Acc:HGNC:15808]
64426	SUDS3	SDS3 homolog, SIN3A corepressor complex component [Source:HGNC Symbol;Acc:HGNC:29545]
64428	CIAO3	cytosolic iron-sulfur assembly component 3 [Source:HGNC Symbol;Acc:HGNC:14179]
64429	ZDHHC6	zinc finger DHHC-type containing 6 [Source:HGNC Symbol;Acc:HGNC:19160]
64432	MRPS25	mitochondrial ribosomal protein S25 [Source:HGNC Symbol;Acc:HGNC:14511]
6449	SGTA	small glutamine rich tetratricopeptide repeat containing alpha [Source:HGNC Symbol;Acc:HGNC:10819]
64755	C16orf58	chromosome 16 open reading frame 58 [Source:HGNC Symbol;Acc:HGNC:25848]
64792	IFT22	intraflagellar transport 22 [Source:HGNC Symbol;Acc:HGNC:21895]
64852	TUT1	terminal uridylyl transferase 1, U6 snRNA-specific [Source:HGNC Symbol;Acc:HGNC:26184]
64968	MRPS6	mitochondrial ribosomal protein S6 [Source:HGNC Symbol;Acc:HGNC:14051]
65263	PYCR3	pyrroline-5-carboxylate reductase 3 [Source:HGNC Symbol;Acc:HGNC:25846]
65265	C8orf33	chromosome 8 open reading frame 33 [Source:HGNC Symbol;Acc:HGNC:26104]
653319	KIAA0895L	KIAA0895 like [Source:HGNC Symbol;Acc:HGNC:34408]
654364	NME1-NME2	NME1-NME2 readthrough [Source:HGNC Symbol;Acc:HGNC:33531]
65990	FAM173A	family with sequence similarity 173 member A [Source:HGNC Symbol;Acc:HGNC:14152]
65992	DDRGK1	DDRGK domain containing 1 [Source:HGNC Symbol;Acc:HGNC:16110]
6603	SMARCD2	SWI/SNF related, matrix associated, actin dependent regulator of chromatin, subfamily d, member 2 [Source:HGNC Symbol;Acc:HGNC:11107]
6604	SMARCD3	SWI/SNF related, matrix associated, actin dependent regulator of chromatin, subfamily d, member 3 [Source:HGNC Symbol;Acc:HGNC:11108]
6609	SMPD1	sphingomyelin phosphodiesterase 1 [Source:HGNC Symbol;Acc:HGNC:11120]
6610	SMPD2	sphingomyelin phosphodiesterase 2 [Source:HGNC Symbol;Acc:HGNC:11121]
6729	SRP54	signal recognition particle 54 [Source:HGNC Symbol;Acc:HGNC:11301]
6778	STAT6	signal transducer and activator of transcription 6 [Source:HGNC Symbol;Acc:HGNC:11368]
6813	STXBP2	syntaxin binding protein 2 [Source:HGNC Symbol;Acc:HGNC:11445]
6830	SUPT6H	SPT6 homolog, histone chaperone and transcription elongation factor [Source:HGNC Symbol;Acc:HGNC:11470]
6854	SYN2	synapsin II [Source:HGNC Symbol;Acc:HGNC:11495]
6857	SYT1	synaptotagmin 1 [Source:HGNC Symbol;Acc:HGNC:11509]
6877	TAF5	TATA-box binding protein associated factor 5 [Source:HGNC Symbol;Acc:HGNC:11539]
6901	TAZ	tafazzin [Source:HGNC Symbol;Acc:HGNC:11577]
6905	TBCE	tubulin folding cofactor E [Source:HGNC Symbol;Acc:HGNC:11582]
6993	DYNLT1	dynein light chain Tctex-type 1 [Source:HGNC Symbol;Acc:HGNC:11697]
7011	TEP1	telomerase associated protein 1 [Source:HGNC Symbol;Acc:HGNC:11726]
7260	EIPR1	EARP complex and GARP complex interacting protein 1 [Source:HGNC Symbol;Acc:HGNC:12383]
7286	TUFT1	tuftelin 1 [Source:HGNC Symbol;Acc:HGNC:12422]
729515	TMEM242	transmembrane protein 242 [Source:HGNC Symbol;Acc:HGNC:17206]
729967	MORN2	MORN repeat containing 2 [Source:HGNC Symbol;Acc:HGNC:30166]
7305	TYROBP	TYRO protein tyrosine kinase binding protein [Source:HGNC Symbol;Acc:HGNC:12449]
7341	SUMO1	small ubiquitin like modifier 1 [Source:HGNC Symbol;Acc:HGNC:12502]
7375	USP4	ubiquitin specific peptidase 4 [Source:HGNC Symbol;Acc:HGNC:12627]
738	VPS51	VPS51 subunit of GARP complex [Source:HGNC Symbol;Acc:HGNC:1172]
7515	XRCC1	X-ray repair cross complementing 1 [Source:HGNC Symbol;Acc:HGNC:12828]
7559	ZNF12	zinc finger protein 12 [Source:HGNC Symbol;Acc:HGNC:12902]
757	TMEM50B	transmembrane protein 50B [Source:HGNC Symbol;Acc:HGNC:1280]
7733	ZNF180	zinc finger protein 180 [Source:HGNC Symbol;Acc:HGNC:12970]
7763	ZFAND5	zinc finger AN1-type containing 5 [Source:HGNC Symbol;Acc:HGNC:13008]
7837	PXDN	peroxidasin [Source:HGNC Symbol;Acc:HGNC:14966]
784	CACNB3	calcium voltage-gated channel auxiliary subunit beta 3 [Source:HGNC Symbol;Acc:HGNC:1403]
79005	SCNM1	sodium channel modifier 1 [Source:HGNC Symbol;Acc:HGNC:23136]
79038	ZFYVE21	zinc finger FYVE-type containing 21 [Source:HGNC Symbol;Acc:HGNC:20760]
79095	C9orf16	chromosome 9 open reading frame 16 [Source:HGNC Symbol;Acc:HGNC:17823]
790955	UQCC3	ubiquinol-cytochrome c reductase complex assembly factor 3 [Source:HGNC Symbol;Acc:HGNC:34399]
79137	RETREG2	reticulophagy regulator family member 2 [Source:HGNC Symbol;Acc:HGNC:28450]
79139	DERL1	derlin 1 [Source:HGNC Symbol;Acc:HGNC:28454]
79140	CCDC28B	coiled-coil domain containing 28B [Source:HGNC Symbol;Acc:HGNC:28163]
79159	NOL12	nucleolar protein 12 [Source:HGNC Symbol;Acc:HGNC:28585]
79171	RBM42	RNA binding motif protein 42 [Source:HGNC Symbol;Acc:HGNC:28117]
79188	TMEM43	transmembrane protein 43 [Source:HGNC Symbol;Acc:HGNC:28472]
79447	PAGR1	PAXIP1 associated glutamate rich protein 1 [Source:HGNC Symbol;Acc:HGNC:28707]
79603	CERS4	ceramide synthase 4 [Source:HGNC Symbol;Acc:HGNC:23747]
79607	FAM118B	family with sequence similarity 118 member B [Source:HGNC Symbol;Acc:HGNC:26110]
79622	SNRNP25	small nuclear ribonucleoprotein U11/U12 subunit 25 [Source:HGNC Symbol;Acc:HGNC:14161]
79631	EFL1	elongation factor like GTPase 1 [Source:HGNC Symbol;Acc:HGNC:25789]
79648	MCPH1	microcephalin 1 [Source:HGNC Symbol;Acc:HGNC:6954]
79665	DHX40	DEAH-box helicase 40 [Source:HGNC Symbol;Acc:HGNC:18018]
79682	CENPU	centromere protein U [Source:HGNC Symbol;Acc:HGNC:21348]
79695	GALNT12	polypeptide N-acetylgalactosaminyltransferase 12 [Source:HGNC Symbol;Acc:HGNC:19877]
79778	MICALL2	MICAL like 2 [Source:HGNC Symbol;Acc:HGNC:29672]
79796	ALG9	ALG9 alpha-1,2-mannosyltransferase [Source:HGNC Symbol;Acc:HGNC:15672]
79833	GEMIN6	gem nuclear organelle associated protein 6 [Source:HGNC Symbol;Acc:HGNC:20044]
79840	NHEJ1	non-homologous end joining factor 1 [Source:HGNC Symbol;Acc:HGNC:25737]
79850	FAM57A	family with sequence similarity 57 member A [Source:HGNC Symbol;Acc:HGNC:29646]
79871	RPAP2	RNA polymerase II associated protein 2 [Source:HGNC Symbol;Acc:HGNC:25791]
79879	CCDC134	coiled-coil domain containing 134 [Source:HGNC Symbol;Acc:HGNC:26185]
79890	RIN3	Ras and Rab interactor 3 [Source:HGNC Symbol;Acc:HGNC:18751]
79903	NAA60	N(alpha)-acetyltransferase 60, NatF catalytic subunit [Source:HGNC Symbol;Acc:HGNC:25875]
79922	MRM1	mitochondrial rRNA methyltransferase 1 [Source:HGNC Symbol;Acc:HGNC:26202]
79934	COQ8B	coenzyme Q8B [Source:HGNC Symbol;Acc:HGNC:19041]
79991	STN1	STN1 subunit of CST complex [Source:HGNC Symbol;Acc:HGNC:26200]
80114	BICC1	BicC family RNA binding protein 1 [Source:HGNC Symbol;Acc:HGNC:19351]
80184	CEP290	centrosomal protein 290 [Source:HGNC Symbol;Acc:HGNC:29021]
80195	TMEM254	transmembrane protein 254 [Source:HGNC Symbol;Acc:HGNC:25804]
80230	RUFY1	RUN and FYVE domain containing 1 [Source:HGNC Symbol;Acc:HGNC:19760]
80254	CEP63	centrosomal protein 63 [Source:HGNC Symbol;Acc:HGNC:25815]
80349	WDR61	WD repeat domain 61 [Source:HGNC Symbol;Acc:HGNC:30300]
8073	PTP4A2	protein tyrosine phosphatase 4A2 [Source:HGNC Symbol;Acc:HGNC:9635]
80746	TSEN2	tRNA splicing endonuclease subunit 2 [Source:HGNC Symbol;Acc:HGNC:28422]
80775	TMEM177	transmembrane protein 177 [Source:HGNC Symbol;Acc:HGNC:28143]
80789	INTS5	integrator complex subunit 5 [Source:HGNC Symbol;Acc:HGNC:29352]
81037	CLPTM1L	CLPTM1 like [Source:HGNC Symbol;Acc:HGNC:24308]
8120	AP3B2	adaptor related protein complex 3 subunit beta 2 [Source:HGNC Symbol;Acc:HGNC:567]
81490	PTDSS2	phosphatidylserine synthase 2 [Source:HGNC Symbol;Acc:HGNC:15463]
81533	ITFG1	integrin alpha FG-GAP repeat containing 1 [Source:HGNC Symbol;Acc:HGNC:30697]
81551	STMN4	stathmin 4 [Source:HGNC Symbol;Acc:HGNC:16078]
81559	TRIM11	tripartite motif containing 11 [Source:HGNC Symbol;Acc:HGNC:16281]
81562	LMAN2L	lectin, mannose binding 2 like [Source:HGNC Symbol;Acc:HGNC:19263]
81572	PDRG1	p53 and DNA damage regulated 1 [Source:HGNC Symbol;Acc:HGNC:16119]
81575	APOLD1	apolipoprotein L domain containing 1 [Source:HGNC Symbol;Acc:HGNC:25268]
81631	MAP1LC3B	microtubule associated protein 1 light chain 3 beta [Source:HGNC Symbol;Acc:HGNC:13352]
8192	CLPP	caseinolytic mitochondrial matrix peptidase proteolytic subunit [Source:HGNC Symbol;Acc:HGNC:2084]
81926	ABHD17A	abhydrolase domain containing 17A [Source:HGNC Symbol;Acc:HGNC:28756]
826	CAPNS1	calpain small subunit 1 [Source:HGNC Symbol;Acc:HGNC:1481]
8266	UBL4A	ubiquitin like 4A [Source:HGNC Symbol;Acc:HGNC:12505]
8314	BAP1	BRCA1 associated protein 1 [Source:HGNC Symbol;Acc:HGNC:950]
83541	FAM110A	family with sequence similarity 110 member A [Source:HGNC Symbol;Acc:HGNC:16188]
83605	CCM2	CCM2 scaffold protein [Source:HGNC Symbol;Acc:HGNC:21708]
83608	C18orf21	chromosome 18 open reading frame 21 [Source:HGNC Symbol;Acc:HGNC:28802]
83637	ZMIZ2	zinc finger MIZ-type containing 2 [Source:HGNC Symbol;Acc:HGNC:22229]
83641	FAM107B	family with sequence similarity 107 member B [Source:HGNC Symbol;Acc:HGNC:23726]
83693	HSDL1	hydroxysteroid dehydrogenase like 1 [Source:HGNC Symbol;Acc:HGNC:16475]
83696	TRAPPC9	trafficking protein particle complex 9 [Source:HGNC Symbol;Acc:HGNC:30832]
8394	PIP5K1A	phosphatidylinositol-4-phosphate 5-kinase type 1 alpha [Source:HGNC Symbol;Acc:HGNC:8994]
83982	IFI27L2	interferon alpha inducible protein 27 like 2 [Source:HGNC Symbol;Acc:HGNC:19753]
83986	FAM234A	family with sequence similarity 234 member A [Source:HGNC Symbol;Acc:HGNC:14163]
84062	DTNBP1	dystrobrevin binding protein 1 [Source:HGNC Symbol;Acc:HGNC:17328]
84126	ATRIP	ATR interacting protein [Source:HGNC Symbol;Acc:HGNC:33499]
84134	TOMM40L	translocase of outer mitochondrial membrane 40 like [Source:HGNC Symbol;Acc:HGNC:25756]
84245	MRI1	methylthioribose-1-phosphate isomerase 1 [Source:HGNC Symbol;Acc:HGNC:28469]
84259	DCUN1D5	defective in cullin neddylation 1 domain containing 5 [Source:HGNC Symbol;Acc:HGNC:28409]
84279	PRADC1	protease associated domain containing 1 [Source:HGNC Symbol;Acc:HGNC:16047]
84285	EIF1AD	eukaryotic translation initiation factor 1A domain containing [Source:HGNC Symbol;Acc:HGNC:28147]
84299	MIEN1	migration and invasion enhancer 1 [Source:HGNC Symbol;Acc:HGNC:28230]
84303	CHCHD6	coiled-coil-helix-coiled-coil-helix domain containing 6 [Source:HGNC Symbol;Acc:HGNC:28184]
84311	MRPL45	mitochondrial ribosomal protein L45 [Source:HGNC Symbol;Acc:HGNC:16651]
84313	VPS25	vacuolar protein sorting 25 homolog [Source:HGNC Symbol;Acc:HGNC:28122]
84321	THOC3	THO complex 3 [Source:HGNC Symbol;Acc:HGNC:19072]
8433	UTF1	undifferentiated embryonic cell transcription factor 1 [Source:HGNC Symbol;Acc:HGNC:12634]
84461	NEURL4	neuralized E3 ubiquitin protein ligase 4 [Source:HGNC Symbol;Acc:HGNC:34410]
8450	CUL4B	cullin 4B [Source:HGNC Symbol;Acc:HGNC:2555]
84514	GHDC	GH3 domain containing [Source:HGNC Symbol;Acc:HGNC:24438]
84524	ZC3H8	zinc finger CCCH-type containing 8 [Source:HGNC Symbol;Acc:HGNC:30941]
84541	KBTBD8	kelch repeat and BTB domain containing 8 [Source:HGNC Symbol;Acc:HGNC:30691]
84549	MAK16	MAK16 homolog [Source:HGNC Symbol;Acc:HGNC:13703]
84626	KRBA1	KRAB-A domain containing 1 [Source:HGNC Symbol;Acc:HGNC:22228]
84749	USP30	ubiquitin specific peptidase 30 [Source:HGNC Symbol;Acc:HGNC:20065]
84816	RTN4IP1	reticulon 4 interacting protein 1 [Source:HGNC Symbol;Acc:HGNC:18647]
84836	ABHD14B	abhydrolase domain containing 14B [Source:HGNC Symbol;Acc:HGNC:28235]
84838	ZNF496	zinc finger protein 496 [Source:HGNC Symbol;Acc:HGNC:23713]
84883	AIFM2	apoptosis inducing factor mitochondria associated 2 [Source:HGNC Symbol;Acc:HGNC:21411]
84936	ZFYVE19	zinc finger FYVE-type containing 19 [Source:HGNC Symbol;Acc:HGNC:20758]
84955	NUDCD1	NudC domain containing 1 [Source:HGNC Symbol;Acc:HGNC:24306]
8498	RANBP3	RAN binding protein 3 [Source:HGNC Symbol;Acc:HGNC:9850]
84984	CEP19	centrosomal protein 19 [Source:HGNC Symbol;Acc:HGNC:28209]
85025	TMEM60	transmembrane protein 60 [Source:HGNC Symbol;Acc:HGNC:21754]
85302	FBF1	Fas binding factor 1 [Source:HGNC Symbol;Acc:HGNC:24674]
85313	PPIL4	peptidylprolyl isomerase like 4 [Source:HGNC Symbol;Acc:HGNC:15702]
8533	COPS3	COP9 signalosome subunit 3 [Source:HGNC Symbol;Acc:HGNC:2239]
8536	CAMK1	calcium/calmodulin dependent protein kinase I [Source:HGNC Symbol;Acc:HGNC:1459]
8539	API5	apoptosis inhibitor 5 [Source:HGNC Symbol;Acc:HGNC:594]
85395	FAM207A	family with sequence similarity 207 member A [Source:HGNC Symbol;Acc:HGNC:15811]
85476	GFM1	G elongation factor mitochondrial 1 [Source:HGNC Symbol;Acc:HGNC:13780]
8562	DENR	density regulated re-initiation and release factor [Source:HGNC Symbol;Acc:HGNC:2769]
8565	YARS	tyrosyl-tRNA synthetase [Source:HGNC Symbol;Acc:HGNC:12840]
8566	PDXK	pyridoxal kinase [Source:HGNC Symbol;Acc:HGNC:8819]
8612	PLPP2	phospholipid phosphatase 2 [Source:HGNC Symbol;Acc:HGNC:9230]
8666	EIF3G	eukaryotic translation initiation factor 3 subunit G [Source:NCBI gene;Acc:8666]
8733	GPAA1	glycosylphosphatidylinositol anchor attachment 1 [Source:HGNC Symbol;Acc:HGNC:4446]
8794	TNFRSF10C	TNF receptor superfamily member 10c [Source:HGNC Symbol;Acc:HGNC:11906]
8818	DPM2	dolichyl-phosphate mannosyltransferase subunit 2, regulatory [Source:HGNC Symbol;Acc:HGNC:3006]
8826	IQGAP1	IQ motif containing GTPase activating protein 1 [Source:HGNC Symbol;Acc:HGNC:6110]
88745	RRP36	ribosomal RNA processing 36 [Source:HGNC Symbol;Acc:HGNC:21374]
8891	EIF2B3	eukaryotic translation initiation factor 2B subunit gamma [Source:HGNC Symbol;Acc:HGNC:3259]
8897	MTMR3	myotubularin related protein 3 [Source:HGNC Symbol;Acc:HGNC:7451]
891	CCNB1	cyclin B1 [Source:HGNC Symbol;Acc:HGNC:1579]
8933	RTL8C	retrotransposon Gag like 8C [Source:HGNC Symbol;Acc:HGNC:2569]
89765	RSPH1	radial spoke head component 1 [Source:HGNC Symbol;Acc:HGNC:12371]
8986	RPS6KA4	ribosomal protein S6 kinase A4 [Source:HGNC Symbol;Acc:HGNC:10433]
89910	UBE3B	ubiquitin protein ligase E3B [Source:HGNC Symbol;Acc:HGNC:13478]
90025	UBE3D	ubiquitin protein ligase E3D [Source:HGNC Symbol;Acc:HGNC:21381]
9015	TAF1A	TATA-box binding protein associated factor, RNA polymerase I subunit A [Source:HGNC Symbol;Acc:HGNC:11532]
90204	ZSWIM1	zinc finger SWIM-type containing 1 [Source:HGNC Symbol;Acc:HGNC:16155]
9025	RNF8	ring finger protein 8 [Source:HGNC Symbol;Acc:HGNC:10071]
90268	OTULIN	OTU deubiquitinase with linear linkage specificity [Source:HGNC Symbol;Acc:HGNC:25118]
90324	CCDC97	coiled-coil domain containing 97 [Source:HGNC Symbol;Acc:HGNC:28289]
90381	TICRR	TOPBP1 interacting checkpoint and replication regulator [Source:HGNC Symbol;Acc:HGNC:28704]
9049	AIP	aryl hydrocarbon receptor interacting protein [Source:HGNC Symbol;Acc:HGNC:358]
90522	YIF1B	Yip1 interacting factor homolog B, membrane trafficking protein [Source:HGNC Symbol;Acc:HGNC:30511]
9066	SYT7	synaptotagmin 7 [Source:HGNC Symbol;Acc:HGNC:11514]
90668	CARMIL3	capping protein regulator and myosin 1 linker 3 [Source:HGNC Symbol;Acc:HGNC:20272]
90799	CEP95	centrosomal protein 95 [Source:HGNC Symbol;Acc:HGNC:25141]
90864	SPSB3	splA/ryanodine receptor domain and SOCS box containing 3 [Source:HGNC Symbol;Acc:HGNC:30629]
9088	PKMYT1	protein kinase, membrane associated tyrosine/threonine 1 [Source:HGNC Symbol;Acc:HGNC:29650]
91010	FMNL3	formin like 3 [Source:HGNC Symbol;Acc:HGNC:23698]
91012	CERS5	ceramide synthase 5 [Source:HGNC Symbol;Acc:HGNC:23749]
9117	SEC22C	SEC22 homolog C, vesicle trafficking protein [Source:HGNC Symbol;Acc:HGNC:16828]
9128	PRPF4	pre-mRNA processing factor 4 [Source:HGNC Symbol;Acc:HGNC:17349]
9141	PDCD5	programmed cell death 5 [Source:HGNC Symbol;Acc:HGNC:8764]
91445	RNF185	ring finger protein 185 [Source:HGNC Symbol;Acc:HGNC:26783]
9148	NEURL1	neuralized E3 ubiquitin protein ligase 1 [Source:HGNC Symbol;Acc:HGNC:7761]
9158	FIBP	FGF1 intracellular binding protein [Source:HGNC Symbol;Acc:HGNC:3705]
91875	TTC5	tetratricopeptide repeat domain 5 [Source:HGNC Symbol;Acc:HGNC:19274]
9203	ZMYM3	zinc finger MYM-type containing 3 [Source:HGNC Symbol;Acc:HGNC:13054]
9211	LGI1	leucine rich glioma inactivated 1 [Source:HGNC Symbol;Acc:HGNC:6572]
9213	XPR1	xenotropic and polytropic retrovirus receptor 1 [Source:HGNC Symbol;Acc:HGNC:12827]
92140	MTDH	metadherin [Source:HGNC Symbol;Acc:HGNC:29608]
92399	MRRF	mitochondrial ribosome recycling factor [Source:HGNC Symbol;Acc:HGNC:7234]
9283	GPR37L1	G protein-coupled receptor 37 like 1 [Source:HGNC Symbol;Acc:HGNC:14923]
9294	S1PR2	sphingosine-1-phosphate receptor 2 [Source:HGNC Symbol;Acc:HGNC:3169]
93058	COQ10A	coenzyme Q10A [Source:HGNC Symbol;Acc:HGNC:26515]
9349	RPL23	ribosomal protein L23 [Source:HGNC Symbol;Acc:HGNC:10316]
9397	NMT2	N-myristoyltransferase 2 [Source:HGNC Symbol;Acc:HGNC:7858]
93974	ATP5IF1	ATP synthase inhibitory factor subunit 1 [Source:HGNC Symbol;Acc:HGNC:871]
9399	STOML1	stomatin like 1 [Source:HGNC Symbol;Acc:HGNC:14560]
9403	SELENOF	selenoprotein F [Source:HGNC Symbol;Acc:HGNC:17705]
9445	ITM2B	integral membrane protein 2B [Source:HGNC Symbol;Acc:HGNC:6174]
9481	SLC25A27	solute carrier family 25 member 27 [Source:HGNC Symbol;Acc:HGNC:21065]
95	ACY1	aminoacylase 1 [Source:HGNC Symbol;Acc:HGNC:177]
9552	SPAG7	sperm associated antigen 7 [Source:HGNC Symbol;Acc:HGNC:11216]
9577	BABAM2	BRISC and BRCA1 A complex member 2 [Source:HGNC Symbol;Acc:HGNC:1106]
9611	NCOR1	nuclear receptor corepressor 1 [Source:HGNC Symbol;Acc:HGNC:7672]
9640	ZNF592	zinc finger protein 592 [Source:HGNC Symbol;Acc:HGNC:28986]
9667	SAFB2	scaffold attachment factor B2 [Source:HGNC Symbol;Acc:HGNC:21605]
9673	SLC25A44	solute carrier family 25 member 44 [Source:HGNC Symbol;Acc:HGNC:29036]
9706	ULK2	unc-51 like autophagy activating kinase 2 [Source:HGNC Symbol;Acc:HGNC:13480]
9718	ECE2	endothelin converting enzyme 2 [Source:HGNC Symbol;Acc:HGNC:13275]
9719	ADAMTSL2	ADAMTS like 2 [Source:HGNC Symbol;Acc:HGNC:14631]
9726	ZNF646	zinc finger protein 646 [Source:HGNC Symbol;Acc:HGNC:29004]
9733	SART3	spliceosome associated factor 3, U4/U6 recycling protein [Source:HGNC Symbol;Acc:HGNC:16860]
9776	ATG13	autophagy related 13 [Source:HGNC Symbol;Acc:HGNC:29091]
9823	ARMCX2	armadillo repeat containing X-linked 2 [Source:HGNC Symbol;Acc:HGNC:16869]
9860	LRIG2	leucine rich repeats and immunoglobulin like domains 2 [Source:HGNC Symbol;Acc:HGNC:20889]
9878	TOX4	TOX high mobility group box family member 4 [Source:HGNC Symbol;Acc:HGNC:20161]
9882	TBC1D4	TBC1 domain family member 4 [Source:HGNC Symbol;Acc:HGNC:19165]
9885	OSBPL2	oxysterol binding protein like 2 [Source:HGNC Symbol;Acc:HGNC:15761]
9896	FIG4	FIG4 phosphoinositide 5-phosphatase [Source:HGNC Symbol;Acc:HGNC:16873]
9904	RBM19	RNA binding motif protein 19 [Source:HGNC Symbol;Acc:HGNC:29098]
9929	JOSD1	Josephin domain containing 1 [Source:HGNC Symbol;Acc:HGNC:28953]
9941	EXOG	exo/endonuclease G [Source:HGNC Symbol;Acc:HGNC:3347]
995	CDC25C	cell division cycle 25C [Source:HGNC Symbol;Acc:HGNC:1727]
